# Supplementary material for: Oncopeptide MBOP Encoded by LINC01234 Promotes Colorectal Cancer through MAPK Signaling Pathway
Source: MDPI journal article supplement (doi:10.3390/cancers14092338), 2022-05-09

**Oncopeptide MBOP encoded by *LINC01234* Promotes Colorectal Cancer through MAPK Signaling Pathway**

Fig. 1A

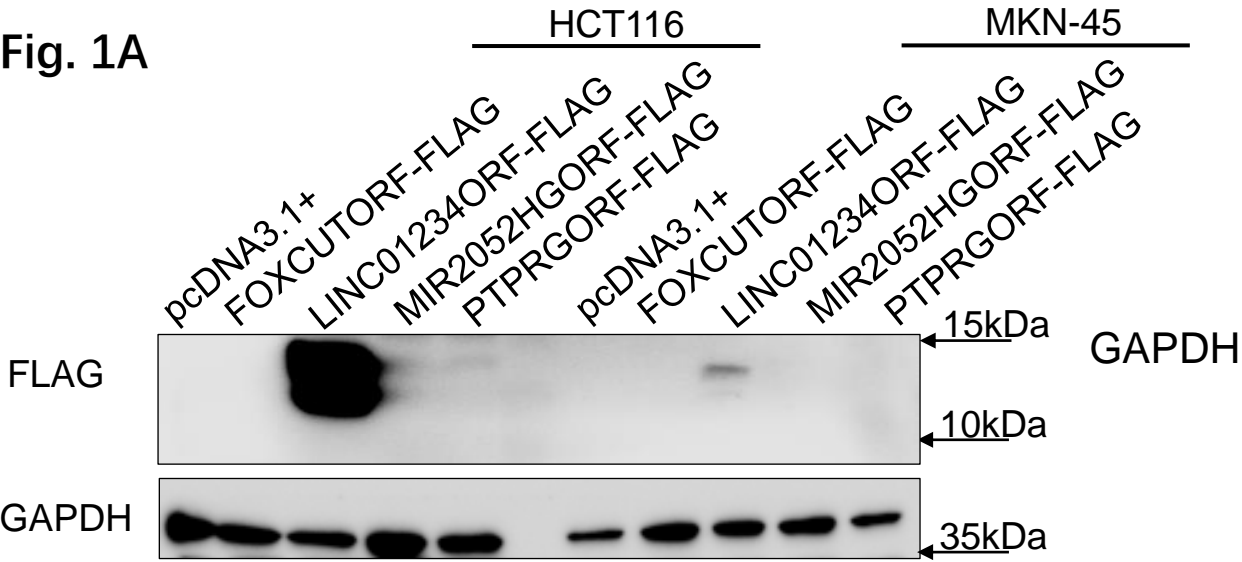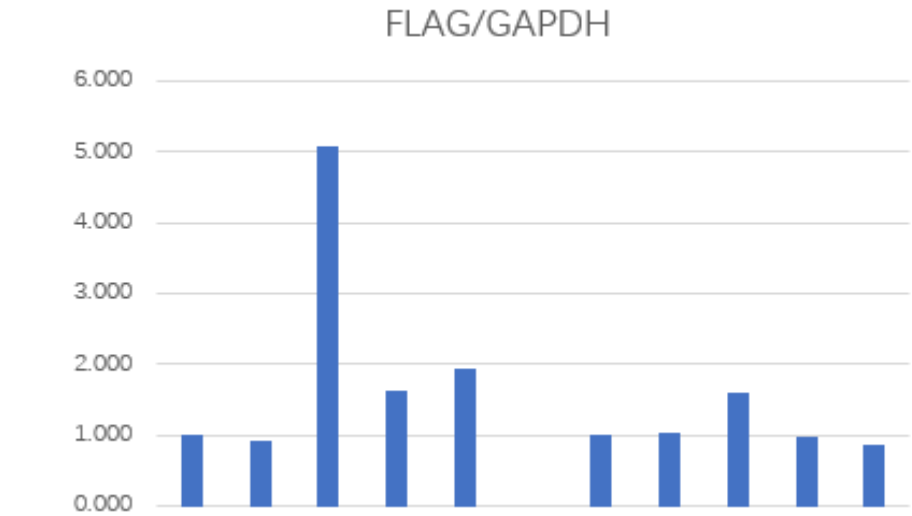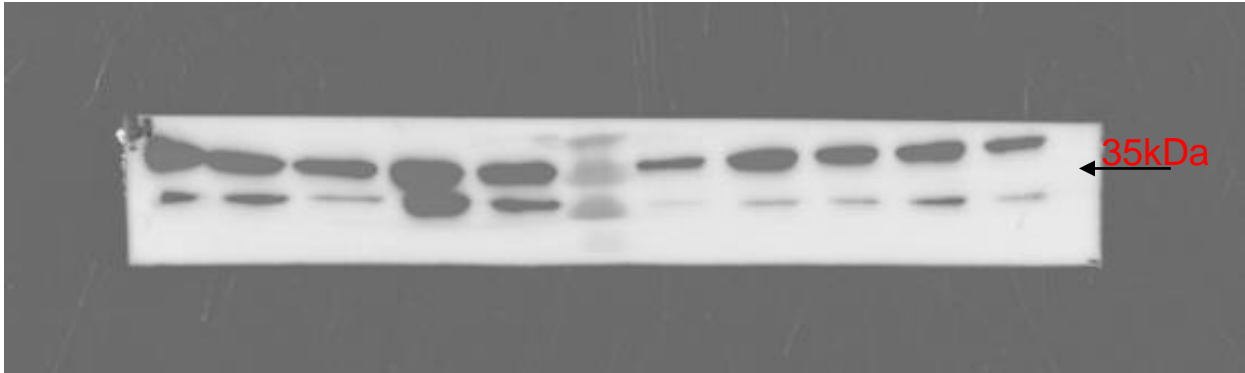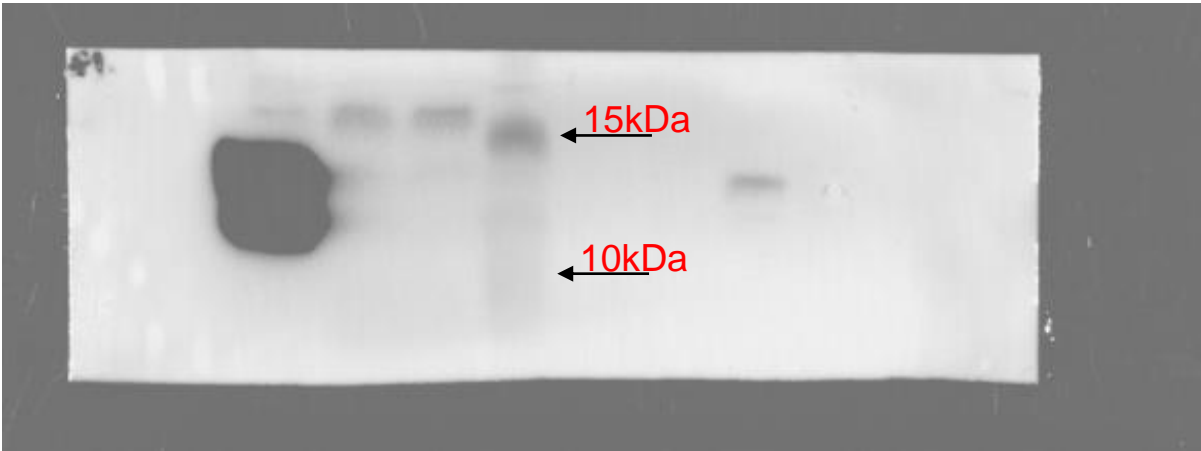

|            | pcDNA3.1+  | FOXCUTORF-  | LINC01234O | MIR2052H | PTPRGORF-FLAG |  | pcDNA3.1 | FOXCUTOF | LINC01234 | MIR2052H | PTPRGORF-FLAG |  |
|------------|------------|-------------|------------|----------|---------------|--|----------|----------|-----------|----------|---------------|--|
| FLAG       | 98856      | 96260       | 546581     | 175307   | 222393        |  | 96128    | 103346   | 165955    | 112638   | 101128        |  |
| GAPDH      | 362742     | 383855      | 394200     | 396569   | 418736        |  | 428167   | 439842   | 459723    | 514436   | 519912        |  |
| FLAG/GAPDH | 0.27252427 | 0.250771776 | 1.38655758 | 0.442059 | 0.531106      |  | 0.224511 | 0.234962 | 0.360989  | 0.218954 | 0.19451       |  |
| Ratio      | 1.000      | 0.920       | 5.088      | 1.622    | 1.949         |  | 1.000    | 1.047    | 1.608     | 0.975    | 0.866         |  |

Fig. 2A upper panel

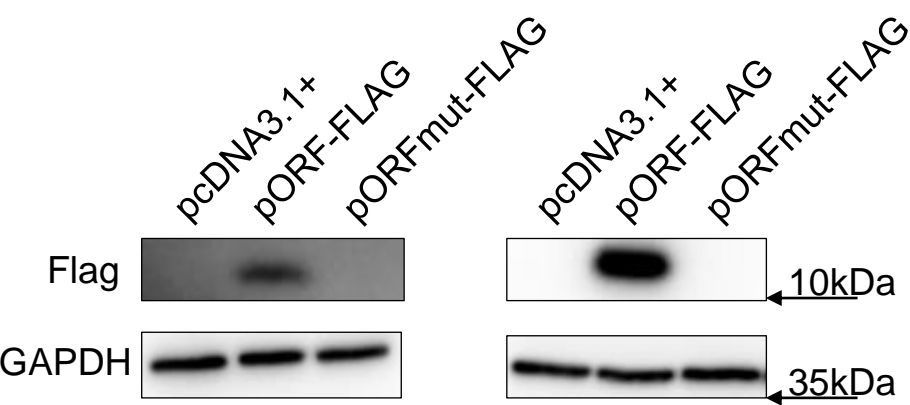

MBOP/GAPDH

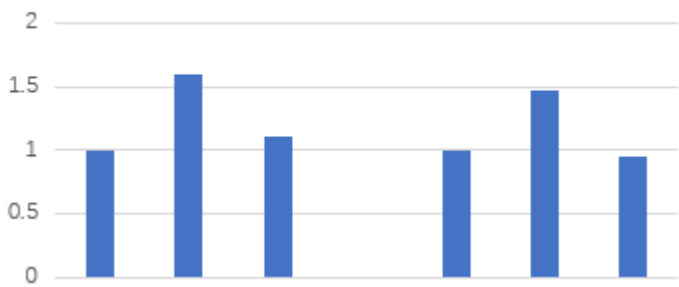

|            | pcDNA3.1 | pORF-FLA | pORFmut-FLAG | pcDNA3.1 | pORF-FLA | pORFmut-FLAG |
|------------|----------|----------|--------------|----------|----------|--------------|
| FLAG       | 585223   | 842038   | 559618       | 985246   | 1493131  | 1013376      |
| GAPDH      | 1716514  | 1545913  | 1487922      | 1086317  | 1122778  | 1177070      |
| FLAG/GAPDH | 0.340937 | 0.544687 | 0.376107     | 0.90696  | 1.329854 | 0.860931     |
| ratio      | 1        | 1.597617 | 1.103157     | 1        | 1.466277 | 0.949249     |

GAPDH

FLAG

GAPDH

FLAG

GAPDH

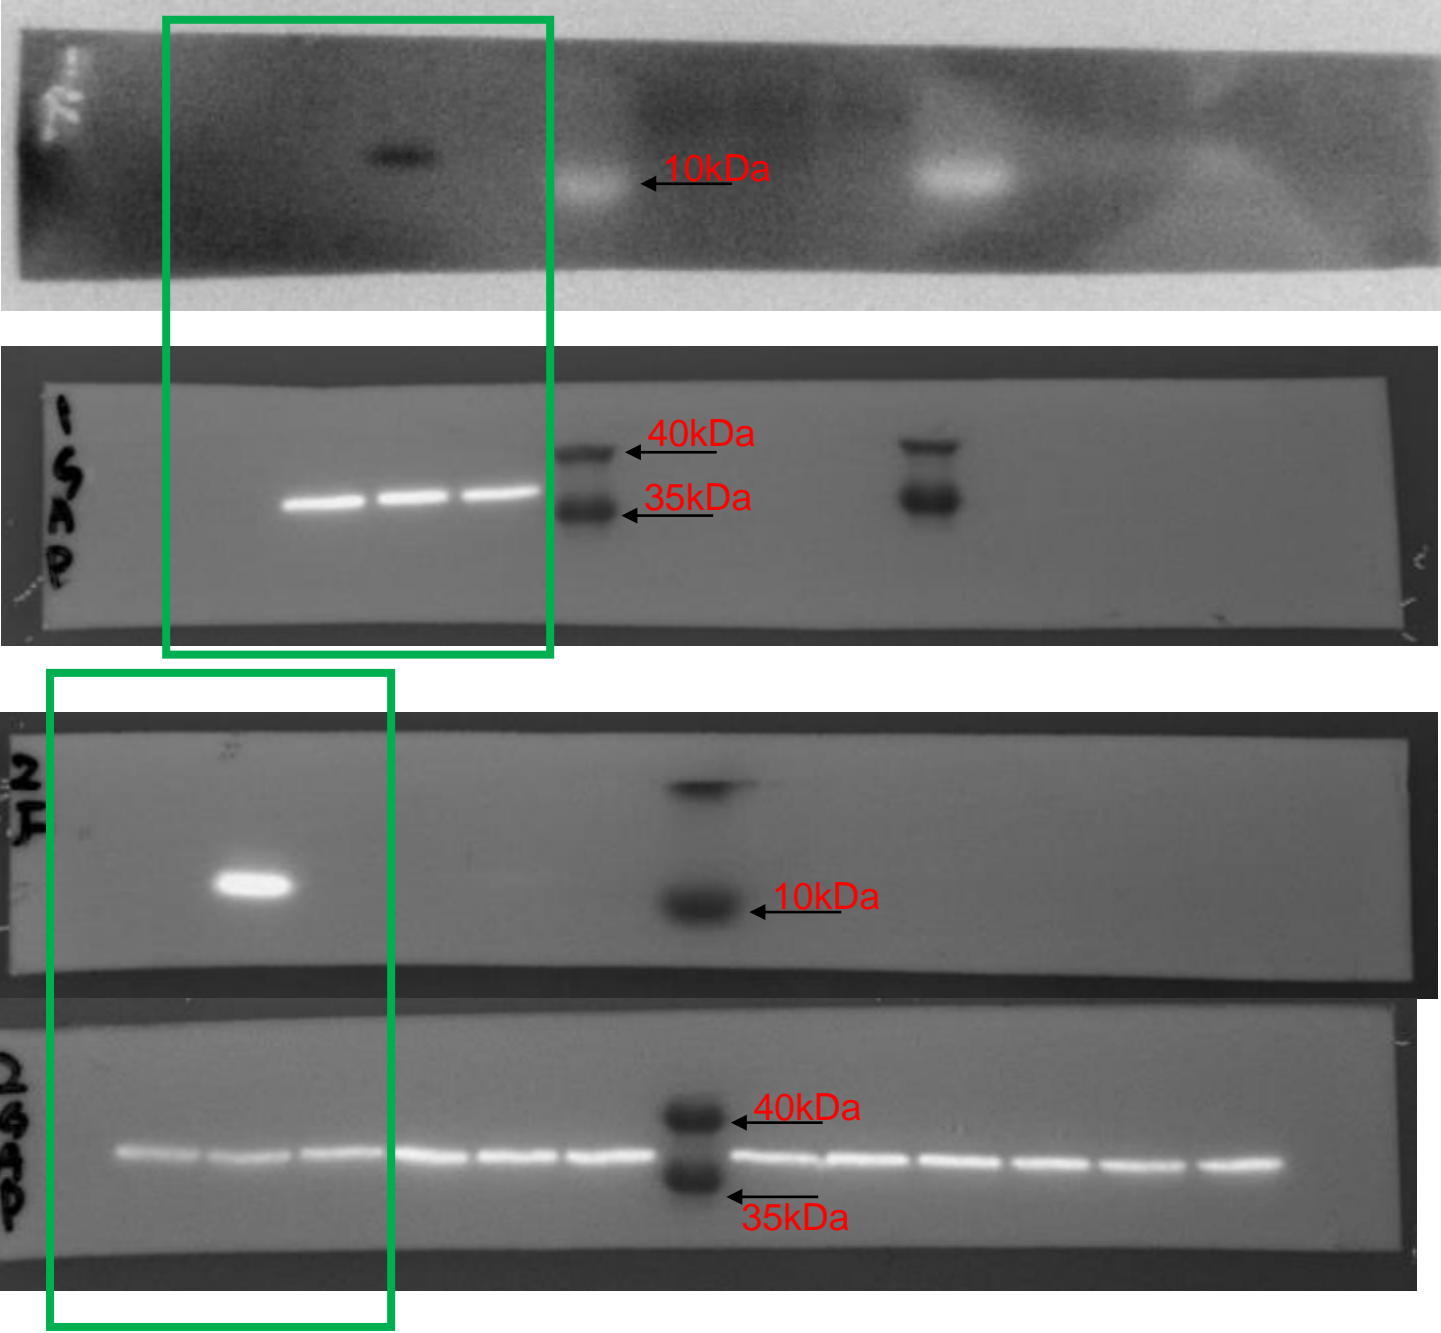

Fig. 2A lower panel

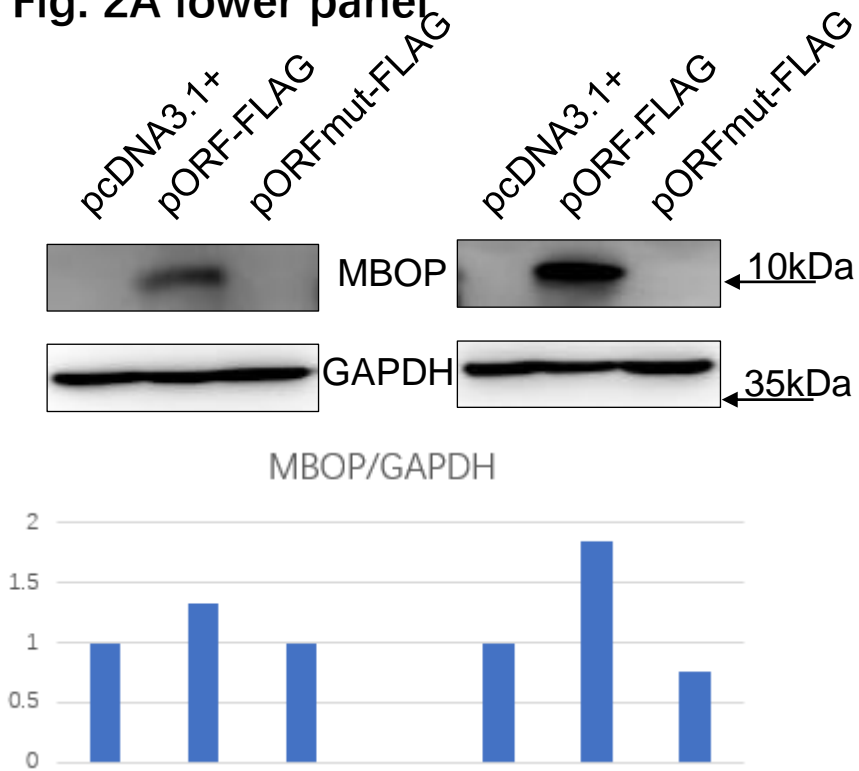

|            | pcDNA3.1 | pORF-FLA | pORFmut-FLAG |  | pcDNA3.1 | pORF-FLA | pORFmut-FLAG |
|------------|----------|----------|--------------|--|----------|----------|--------------|
| MBOP       | 78134    | 102537   | 75134        |  | 95245    | 177011   | 70041        |
| GAPDH      | 259671   | 256551   | 249463       |  | 264251   | 265873   | 258238       |
| MBOP/GAPDH | 0.300896 | 0.399675 | 0.301183     |  | 0.360434 | 0.665773 | 0.271227     |
| ratio      | 1        | 1.328282 | 1.000953     |  | 1        | 1.847143 | 0.7525       |

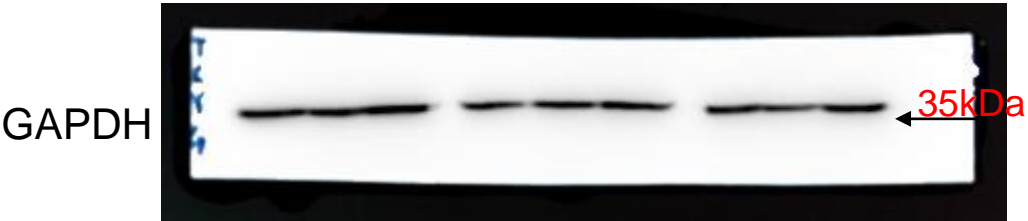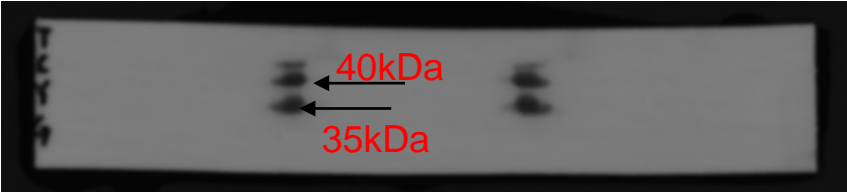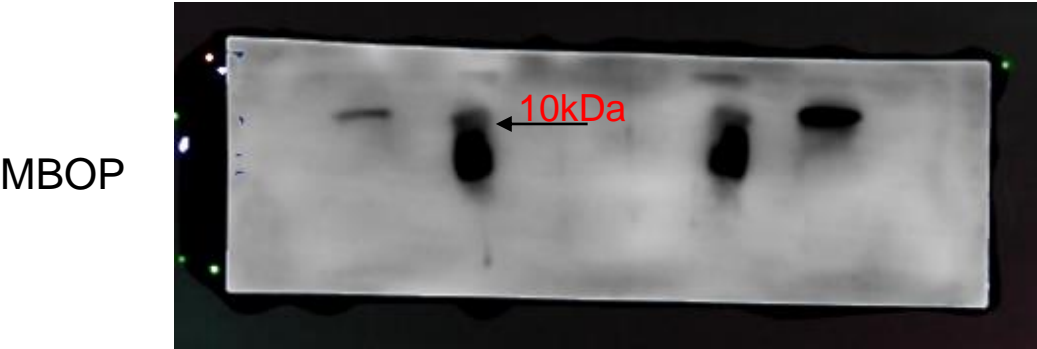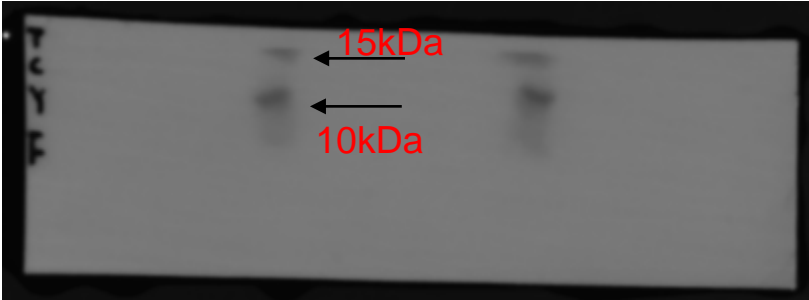

Fig. 2C left panel

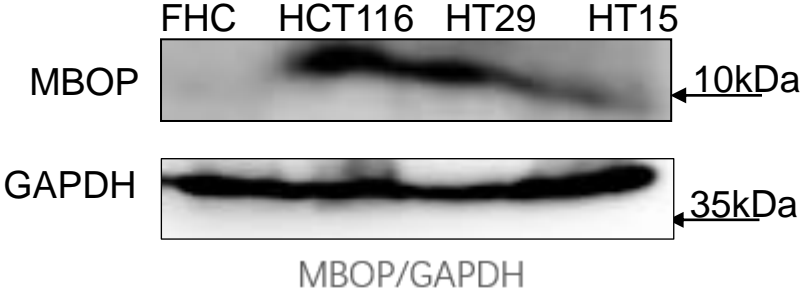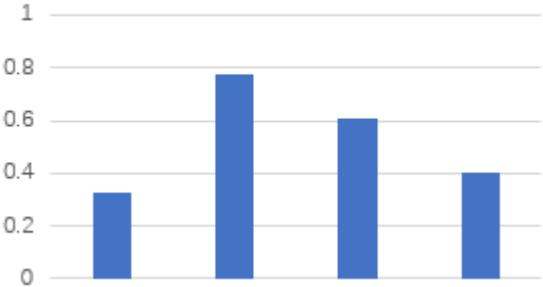

|            | FHC      | HCT116   | HCT15    | HT29     |
|------------|----------|----------|----------|----------|
| MBOP       | 48884    | 93936    | 69580    | 58981    |
| GAPDH      | 150049   | 121609   | 114339   | 146237   |
| MBOP/GAPDH | 0.325787 | 0.772443 | 0.608541 | 0.403325 |

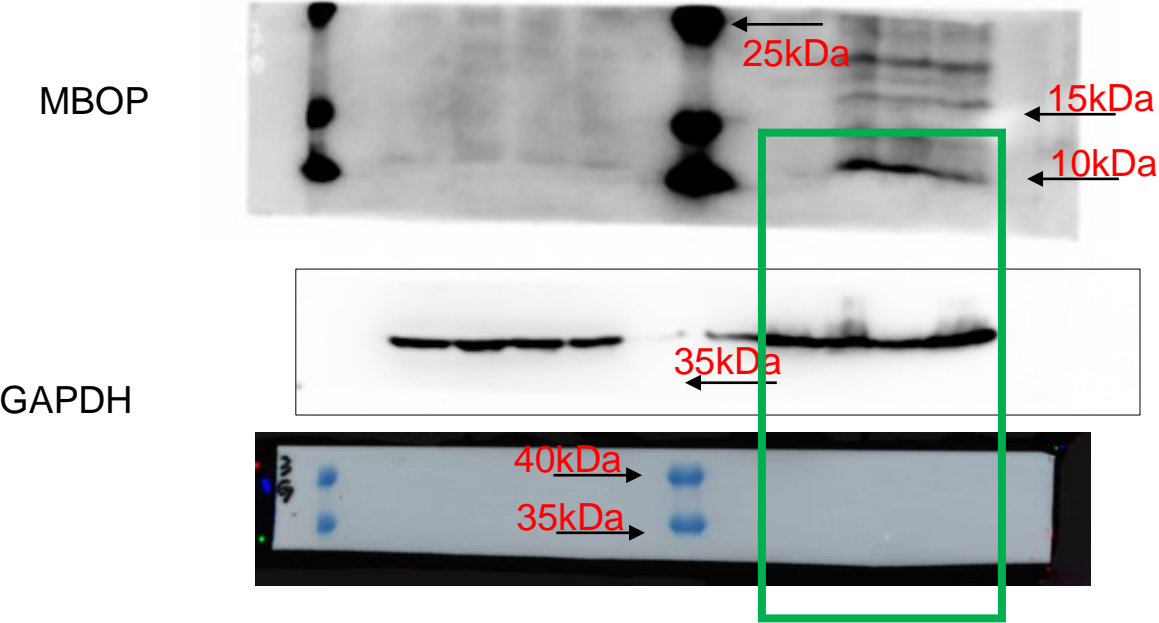

Fig. 2C upper and right panel

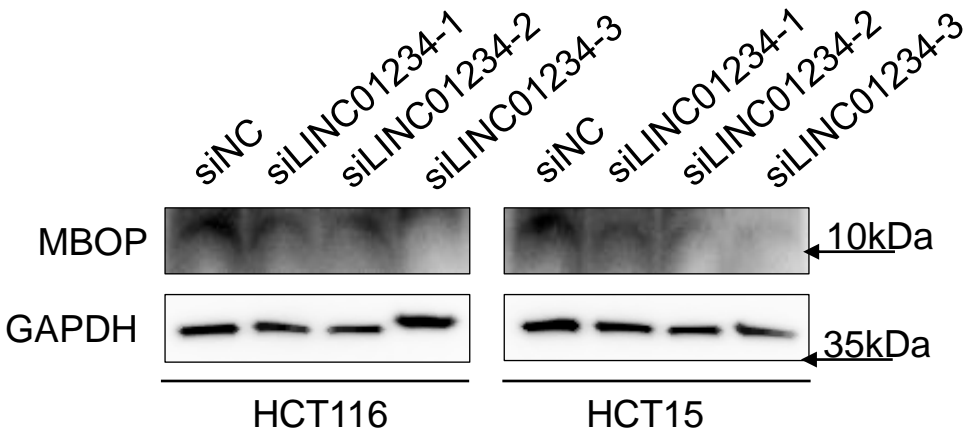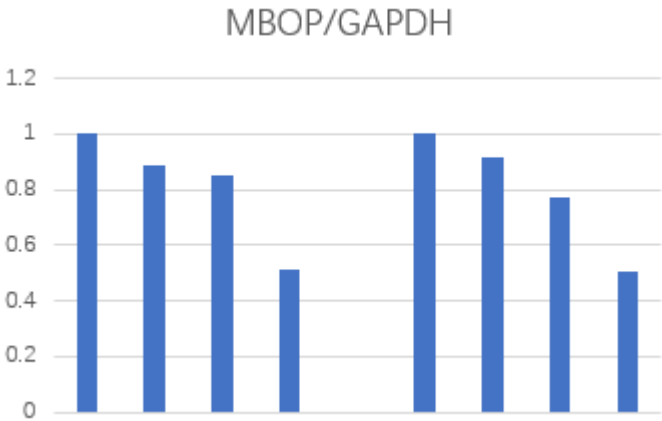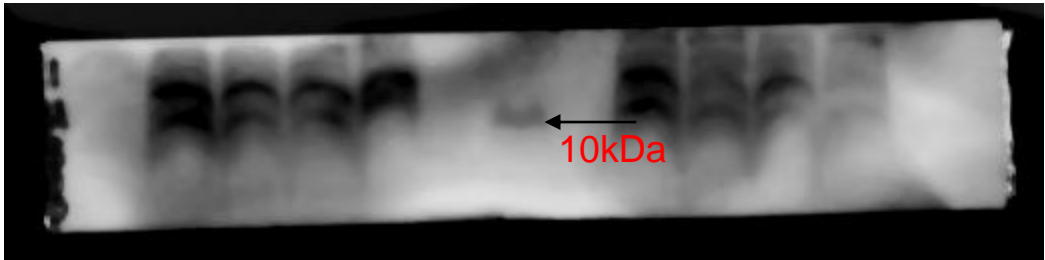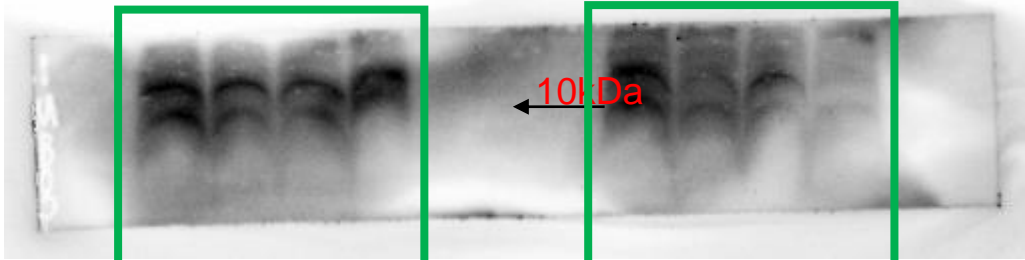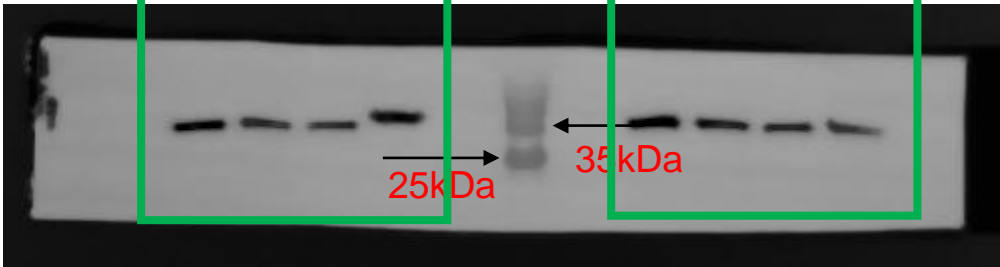

|            | siNC     | siLINC01234-1 | siLINC01234-2 | siLINC01234-3 | siNC     | siLINC01234-1 | siLINC01234-2 | siLINC01234-3 |
|------------|----------|---------------|---------------|---------------|----------|---------------|---------------|---------------|
| MBOP       | 148609   | 113823        | 98009         | 86266         | 133730   | 106938        | 82750         | 57146         |
| GAPDH      | 45307    | 39118         | 35208         | 51327         | 53753    | 47020         | 43222         | 45725         |
| MBOP/GAPDH | 3.280045 | 2.909735      | 2.783714      | 1.680714      | 2.487861 | 2.274309      | 1.914534      | 1.249776      |
| ratio      | 1        | 0.887102      | 0.848682      | 0.512406      | 1        | 0.914162      | 0.76955       | 0.50235       |

Fig. 2C lower panel

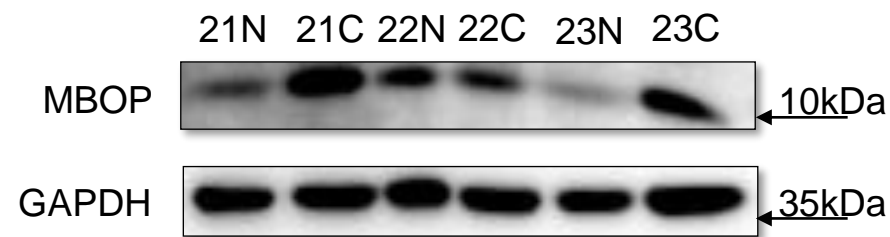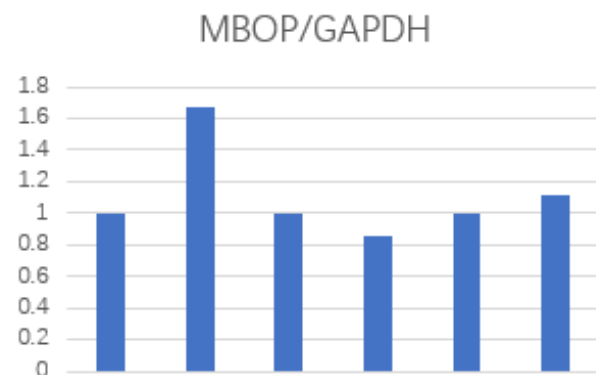

|            | 21N      | 21C      | 22N      | 22C      | 23N      | 23C      |
|------------|----------|----------|----------|----------|----------|----------|
| MBOP       | 129285   | 222500   | 136363   | 132425   | 119320   | 156912   |
| GAPDH      | 103575   | 106686   | 73807    | 83892    | 79823    | 93943    |
| MBOP/GAPDH | 1.248226 | 2.085559 | 1.847562 | 1.578518 | 1.494807 | 1.670289 |
| ratio      | 1        | 1.670819 | 1        | 0.854379 | 1        | 1.117395 |

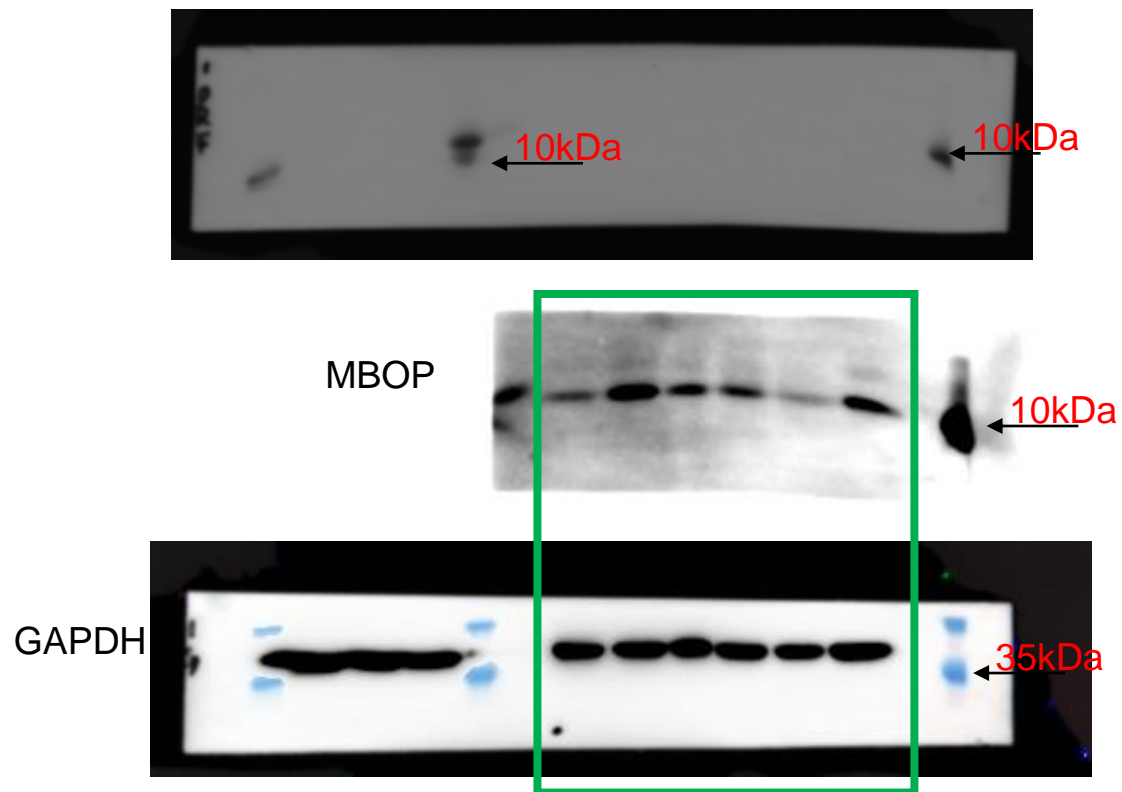

Fig. 2C lower panel

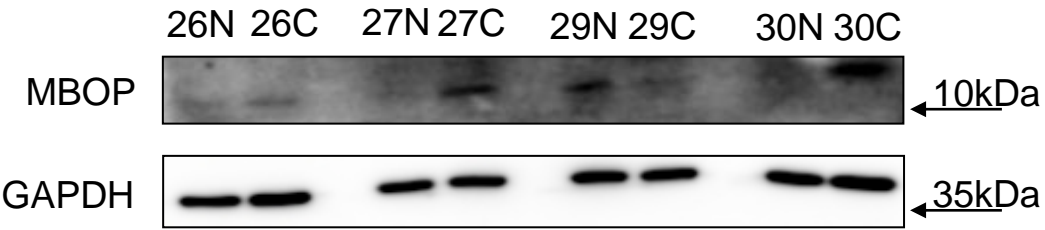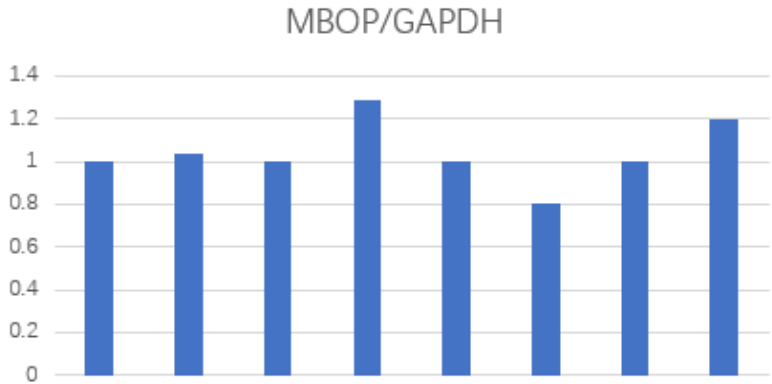

|            | 26N      | 26C      | 27N      | 27C      | 29N      | 29C      | 30N      | 30C      |
|------------|----------|----------|----------|----------|----------|----------|----------|----------|
| MBOP       | 69012    | 85432    | 84964    | 129827   | 139820   | 101080   | 137254   | 190549   |
| GAPDH      | 96671    | 115140   | 95454    | 113149   | 124458   | 111445   | 103041   | 119678   |
| MBOP/GAPDH | 0.713885 | 0.741984 | 0.890104 | 1.147399 | 1.123431 | 0.906994 | 1.332033 | 1.592181 |
| ratio      | 1        | 1.03936  | 1        | 1.289061 | 1        | 0.807343 | 1        | 1.195301 |

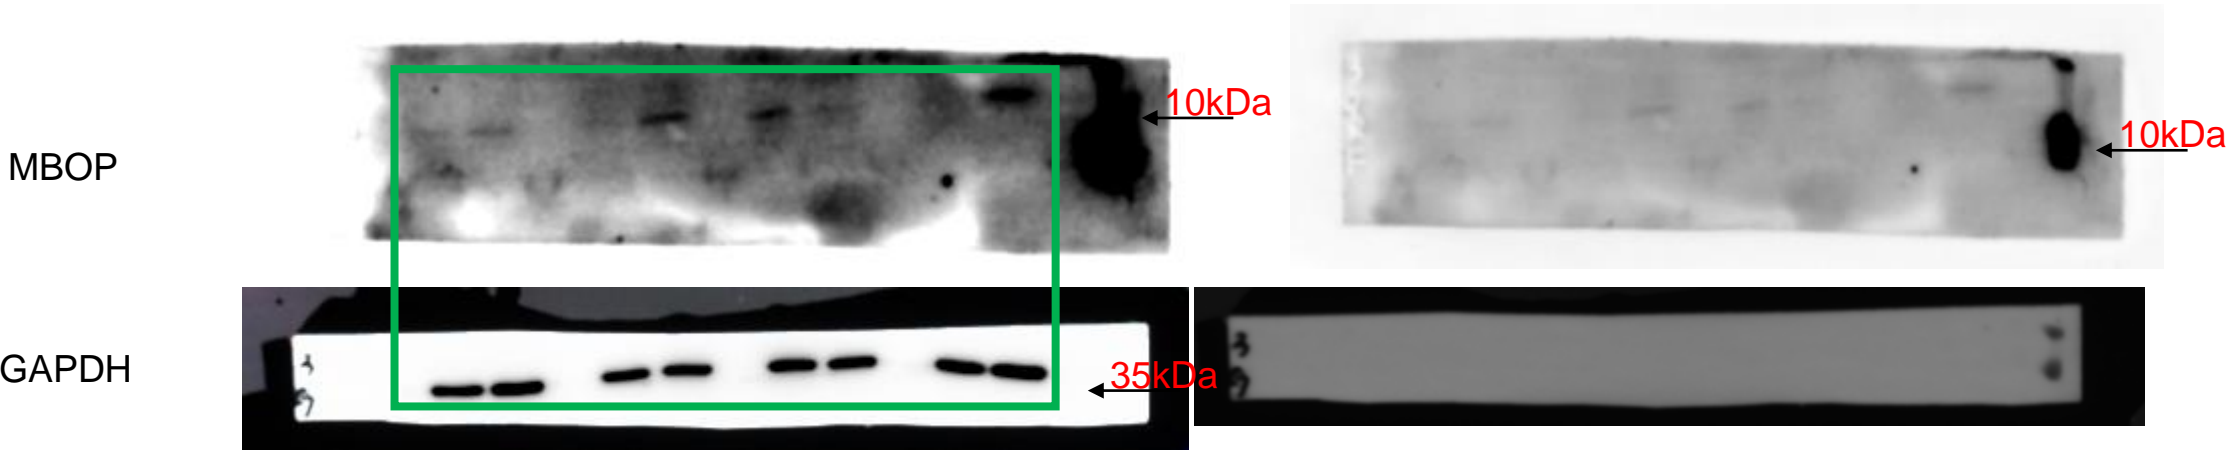



Fig. 2C lower panel

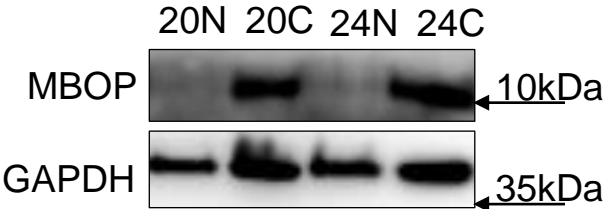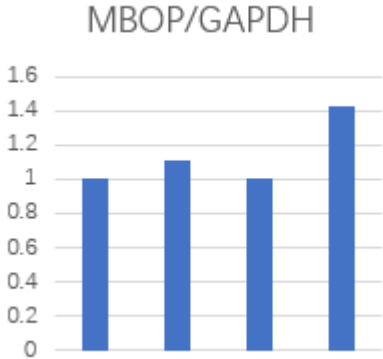

|            | 20N      | 20C      | 24N      | 24C      |
|------------|----------|----------|----------|----------|
| MBOP       | 108790   | 147033   | 100445   | 152537   |
| GAPDH      | 57975    | 70761    | 57301    | 61195    |
| MBOP/GAPDH | 1.876498 | 2.077882 | 1.752936 | 2.492638 |
| ratio      | 1        | 1.107319 | 1        | 1.421979 |

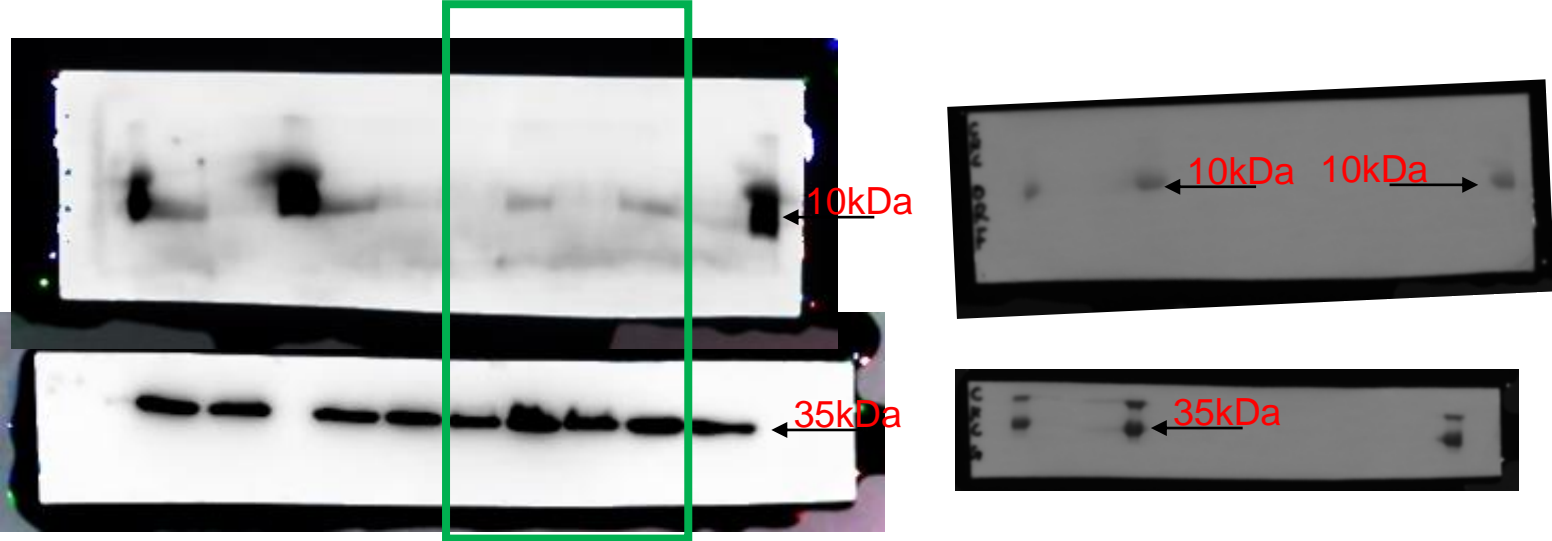

Fig. 2E

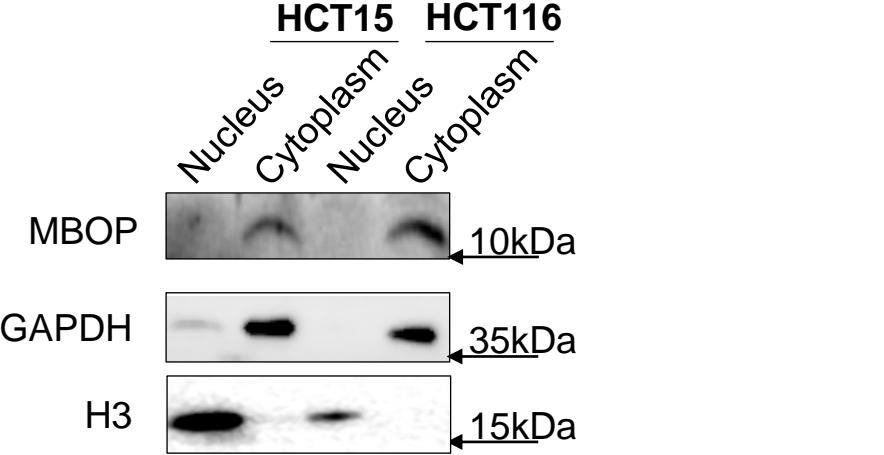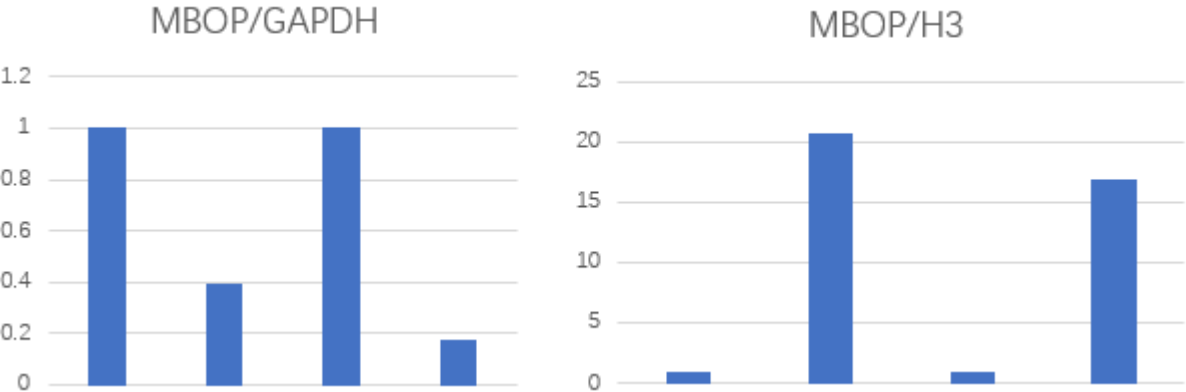

|            | Nucleus   | Cytoplasm  | Nucleus   | Cytoplasm |
|------------|-----------|------------|-----------|-----------|
| MBOP       | 48032     | 74174      | 46029     | 65731     |
| H3         | 136445    | 10201      | 36060     | 3038      |
| GAPDH      | 17843     | 69381      | 5982      | 49490     |
| MBOP/GAPDH | 2.691924  | 1.06908231 | 7.6945838 | 1.328167  |
| ratio      | 1         | 0.39714431 | 1         | 0.172611  |
| MBOP/H3    | 0.3520246 | 7.27124792 | 1.2764559 | 21.63627  |
| ratio2     | 1         | 20.6555093 | 1         | 16.95027  |

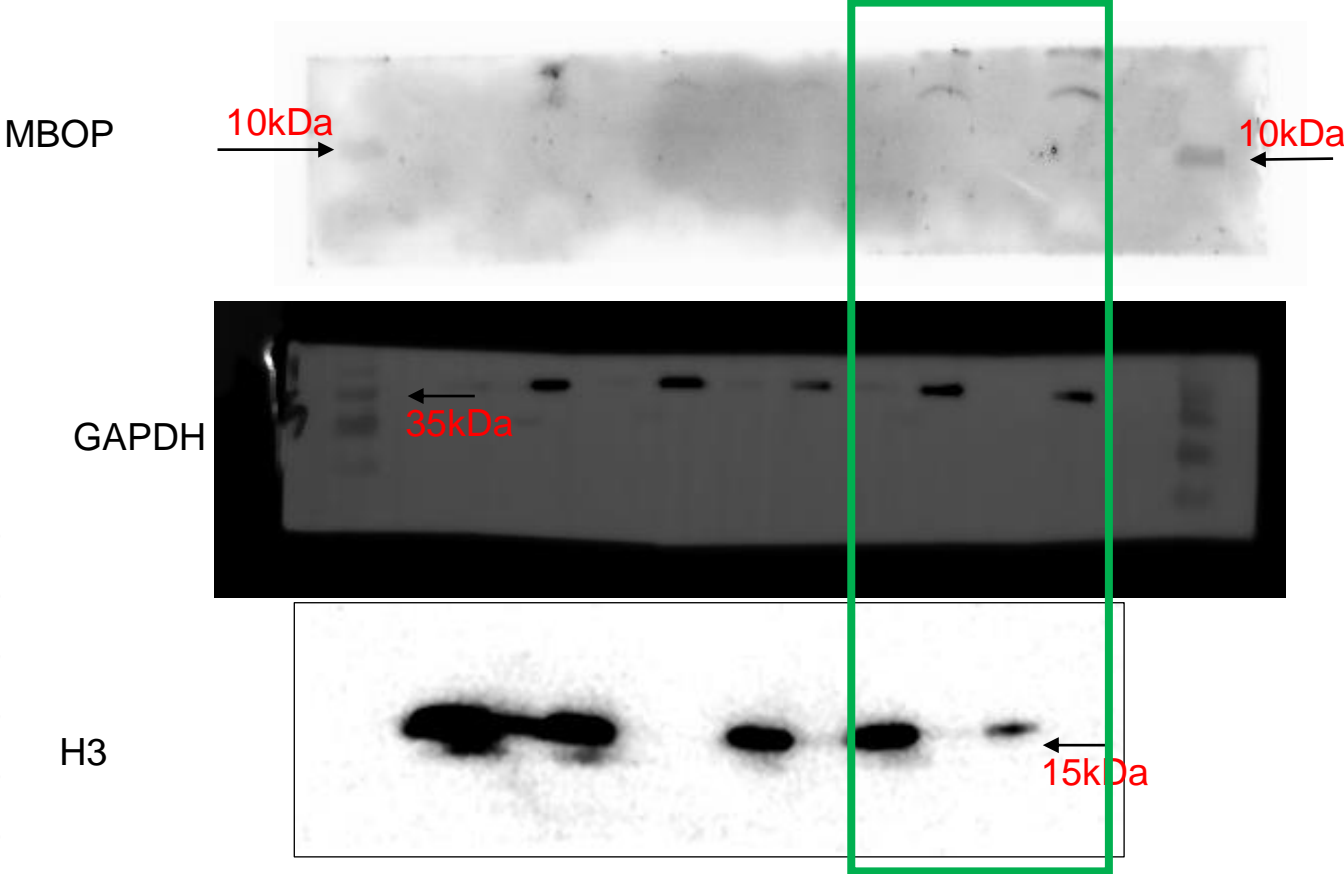

Fig. S2A

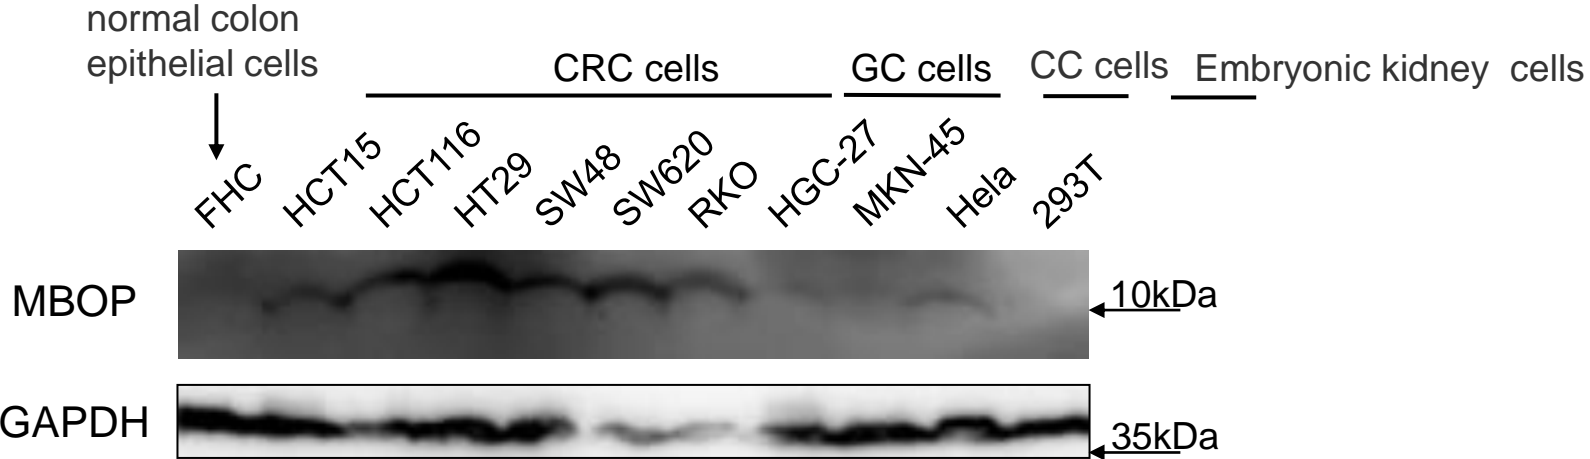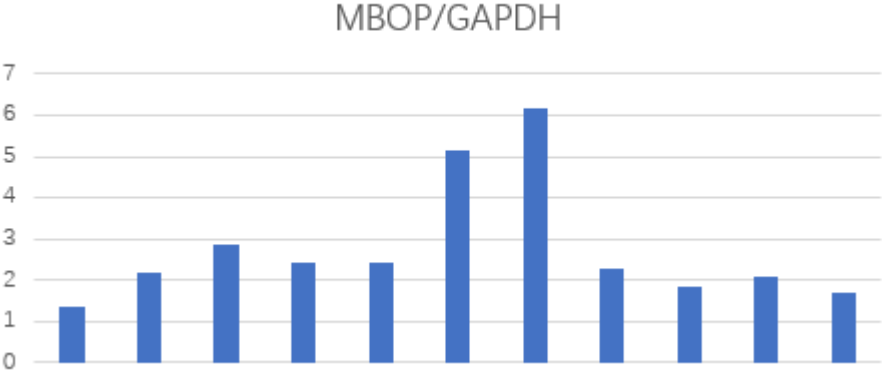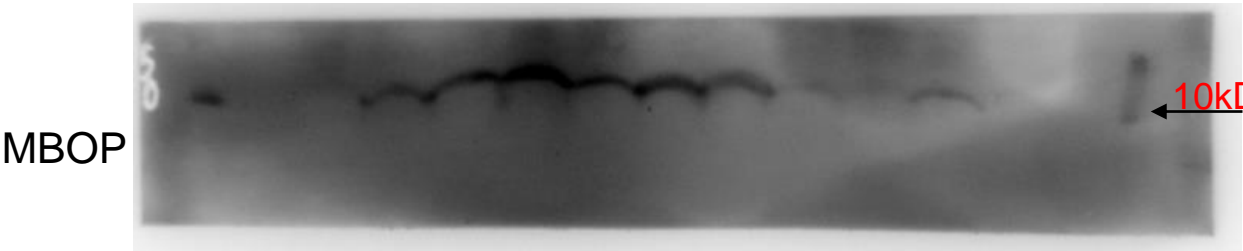

|            | FHC      | HCT15    | HCT116   | HT29     | SW48     | SW620    | RKO      | HGC-27   | MKN-45   | Hela    | 293T     |
|------------|----------|----------|----------|----------|----------|----------|----------|----------|----------|---------|----------|
| MBOP       | 1286339  | 2062766  | 2161783  | 2414520  | 2146712  | 2213243  | 1977691  | 1684676  | 1666453  | 1792625 | 1286339  |
| GAPDH      | 939337   | 937202   | 757387   | 1001258  | 879142   | 429030   | 321753   | 735173   | 898572   | 855701  | 759519   |
| MBOP/GAPDH | 1.369412 | 2.200983 | 2.854265 | 2.411486 | 2.441826 | 5.158714 | 6.146612 | 2.291537 | 1.854557 | 2.09492 | 1.693623 |

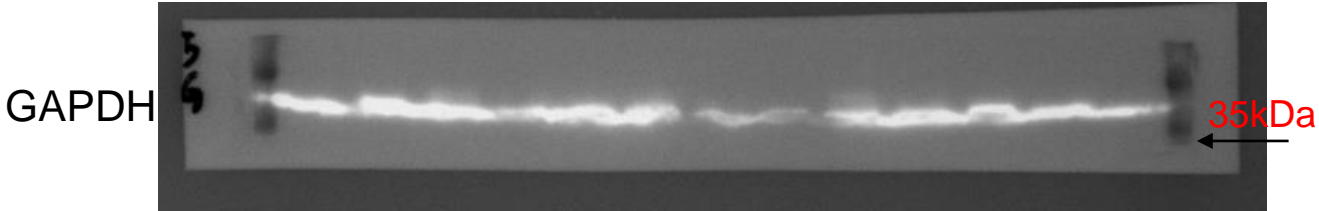

Fig. S2C

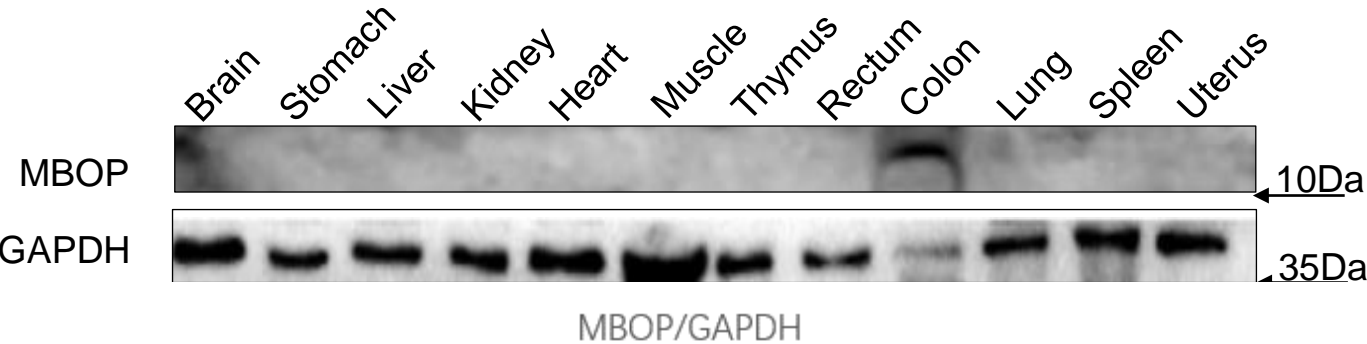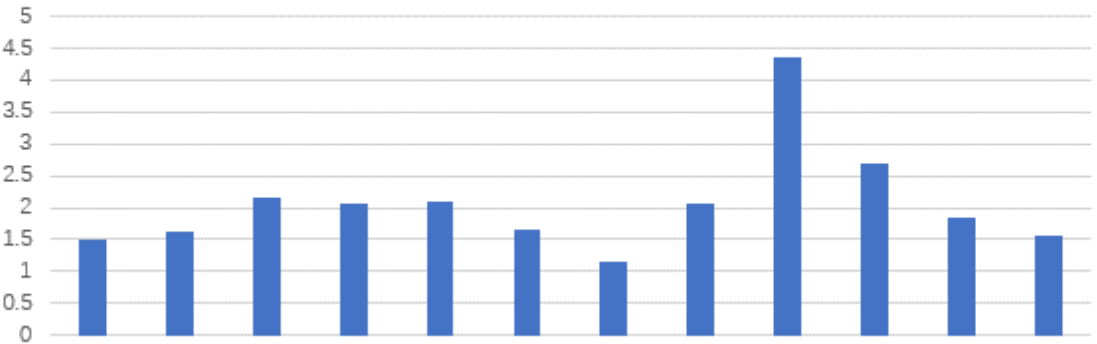

|            | Brain    | Stomach  | Liver    | Kidney  | Heart    | Muscle   | Thymus   | Rectum   | Colon    | Lung     | Spleen   | Uterus   |
|------------|----------|----------|----------|---------|----------|----------|----------|----------|----------|----------|----------|----------|
| MBOP       | 81021    | 93829    | 96236    | 103366  | 104337   | 97536    | 96793    | 97248    | 176664   | 107344   | 103570   | 98961    |
| GAPDH      | 54109    | 57182    | 44703    | 49694   | 49467    | 59156    | 83186    | 47085    | 40569    | 40044    | 55679    | 62848    |
| MBOP/GAPDH | 1.497366 | 1.640883 | 2.152786 | 2.08005 | 2.109224 | 1.648793 | 1.163573 | 2.065371 | 4.354655 | 2.680651 | 1.860127 | 1.574609 |

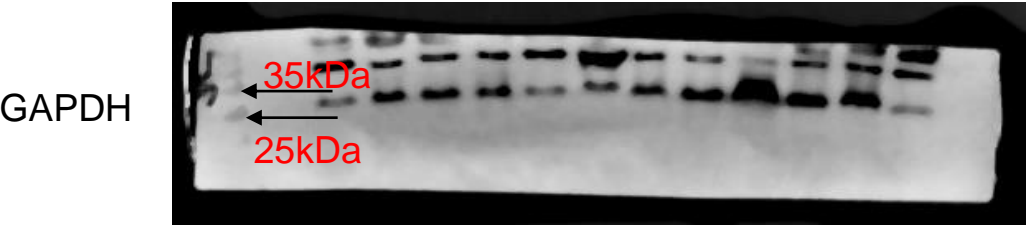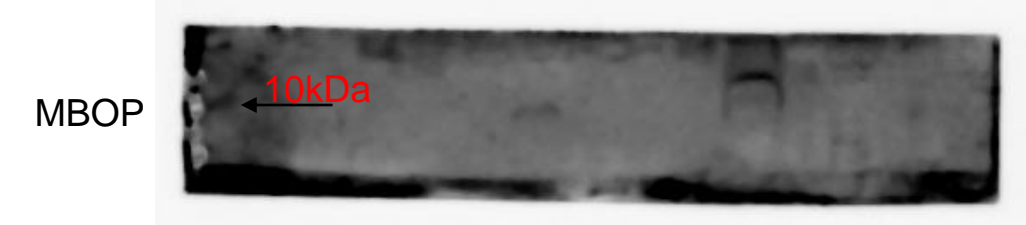

ImageJ straightened the GAPDH band

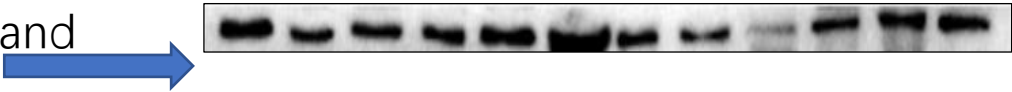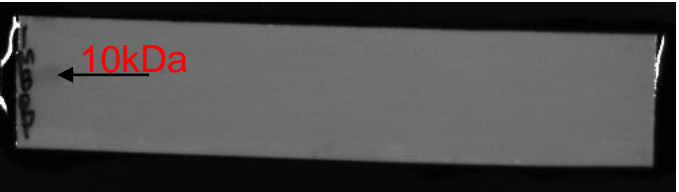

Fig. 3A

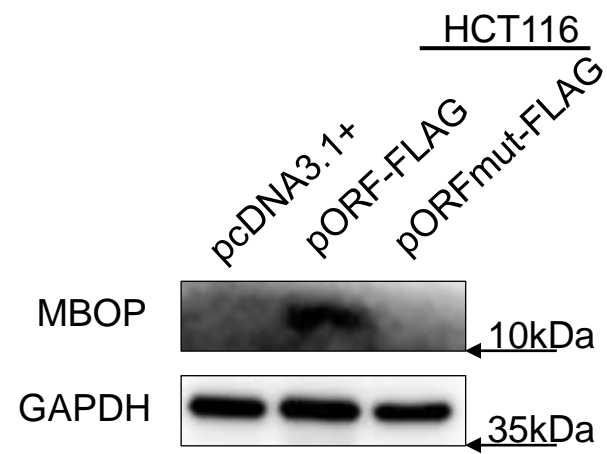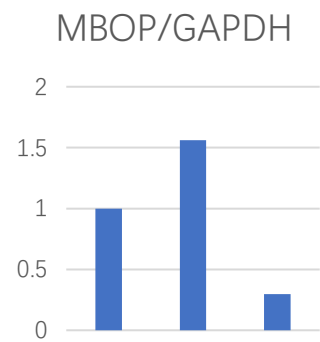

|            | pcDNA3.1 | pORF-FLA | pORFmut-FLAG |
|------------|----------|----------|--------------|
| MBOP       | 48086    | 86164    | 13039        |
| GAPDH      | 63226    | 72513    | 58021        |
| MBOP/GAPDH | 0.760542 | 1.188256 | 0.224729     |
| Ratio      | 1        | 1.562381 | 0.295485     |

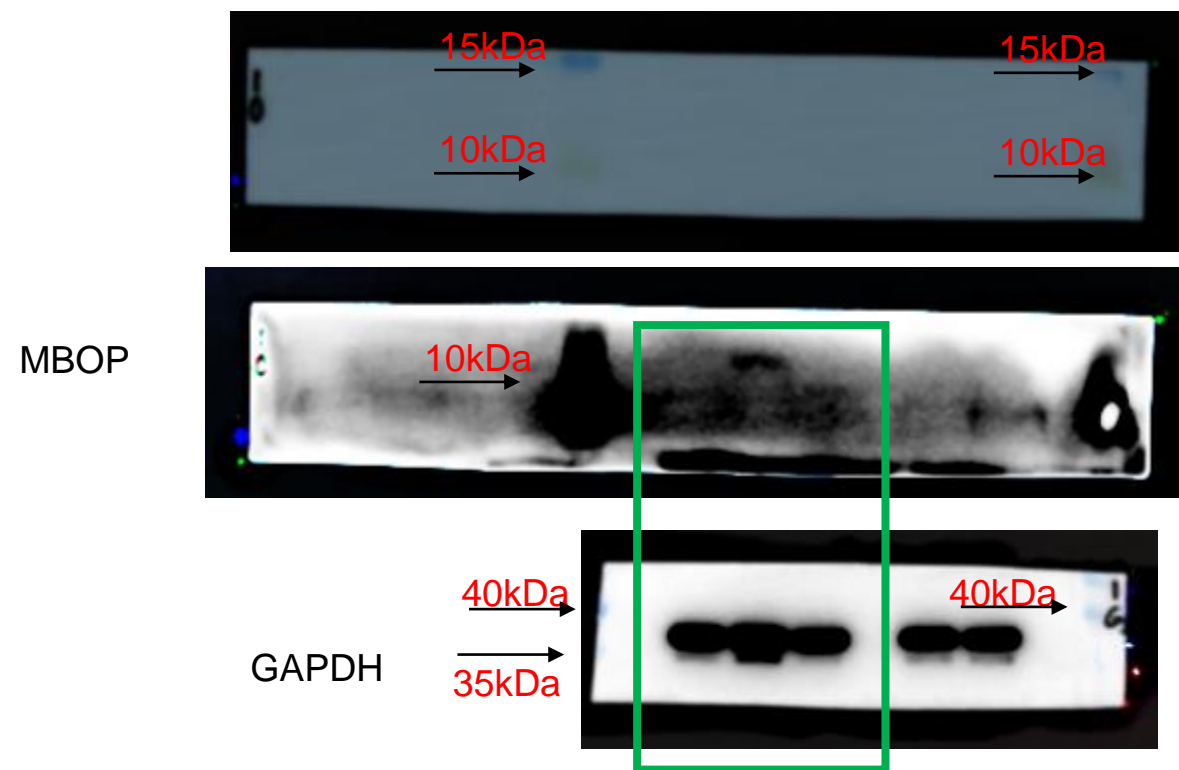

Fig. 3A

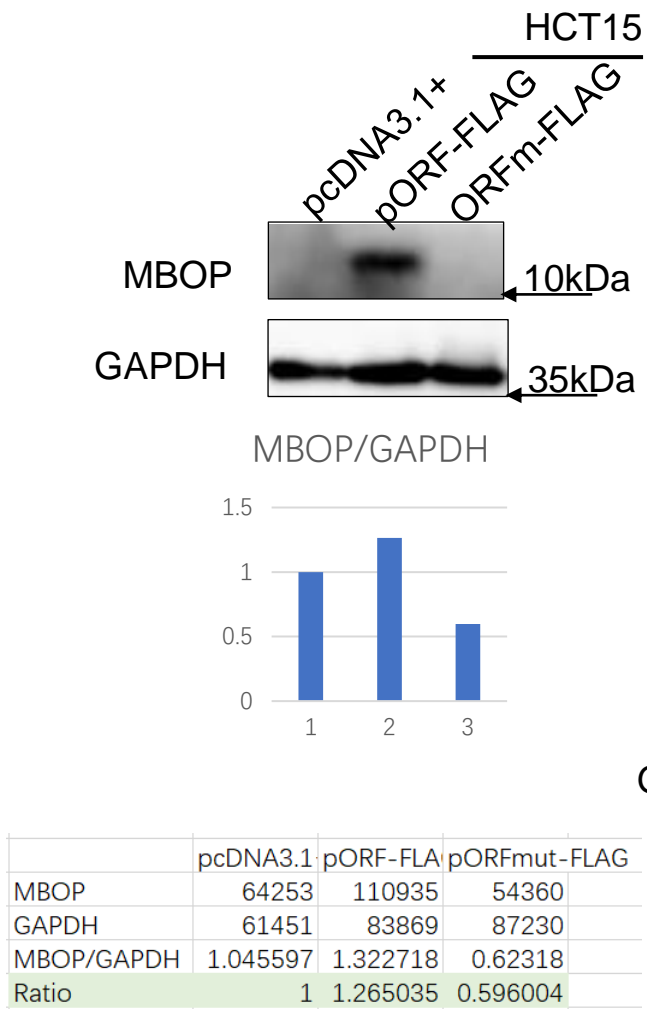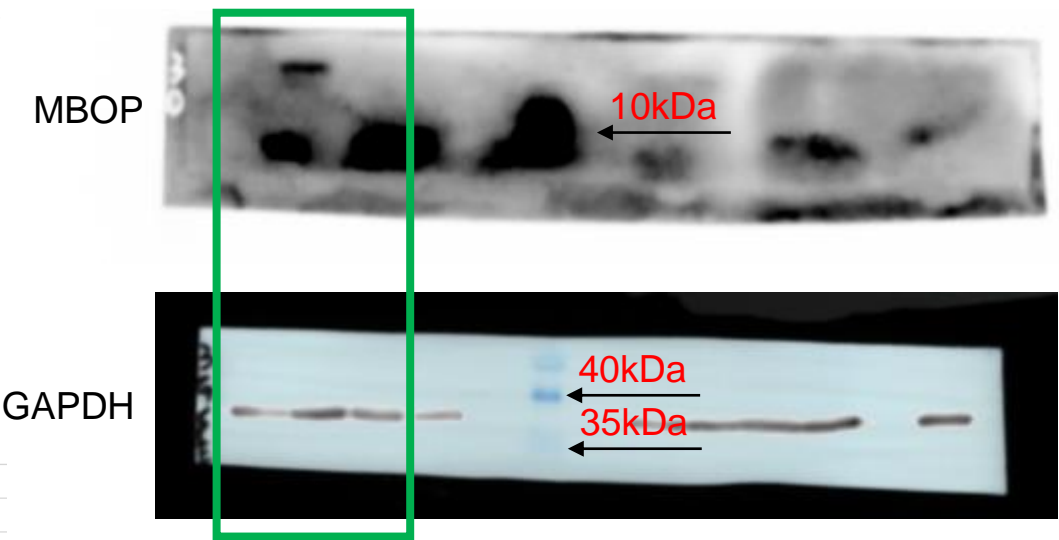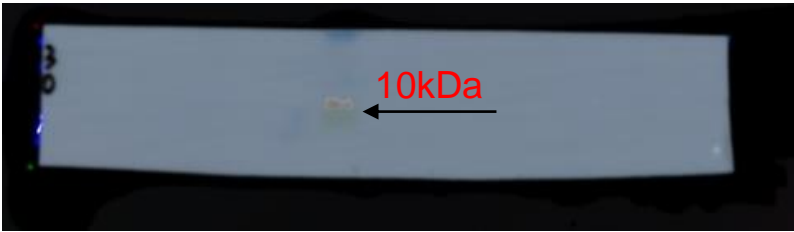

Fig. 3E

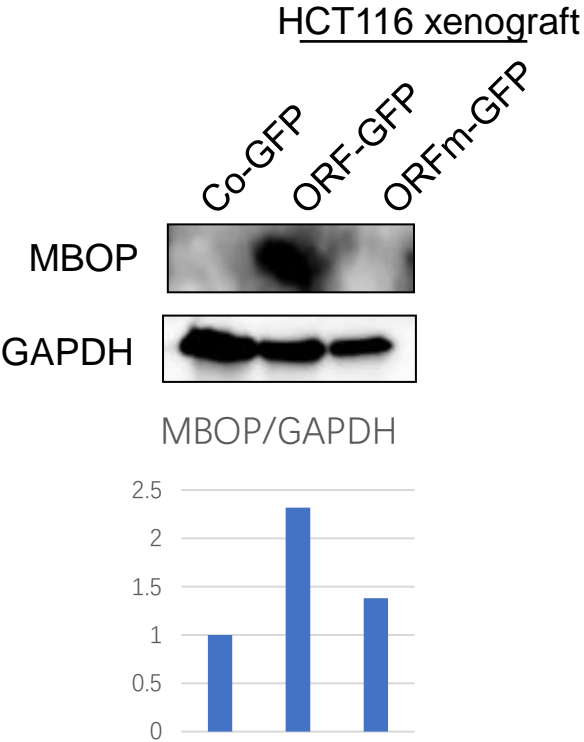

| HCT116 xenograft | co-GFP   | ORF-GFP  | ORFm-GFP |
|------------------|----------|----------|----------|
| MBOP             | 114523   | 214995   | 100451   |
| GAPDH            | 141061   | 114226   | 89567    |
| MBOP/GAPDH       | 0.811869 | 1.88219  | 1.121518 |
| Ratio            | 1        | 2.318343 | 1.381403 |

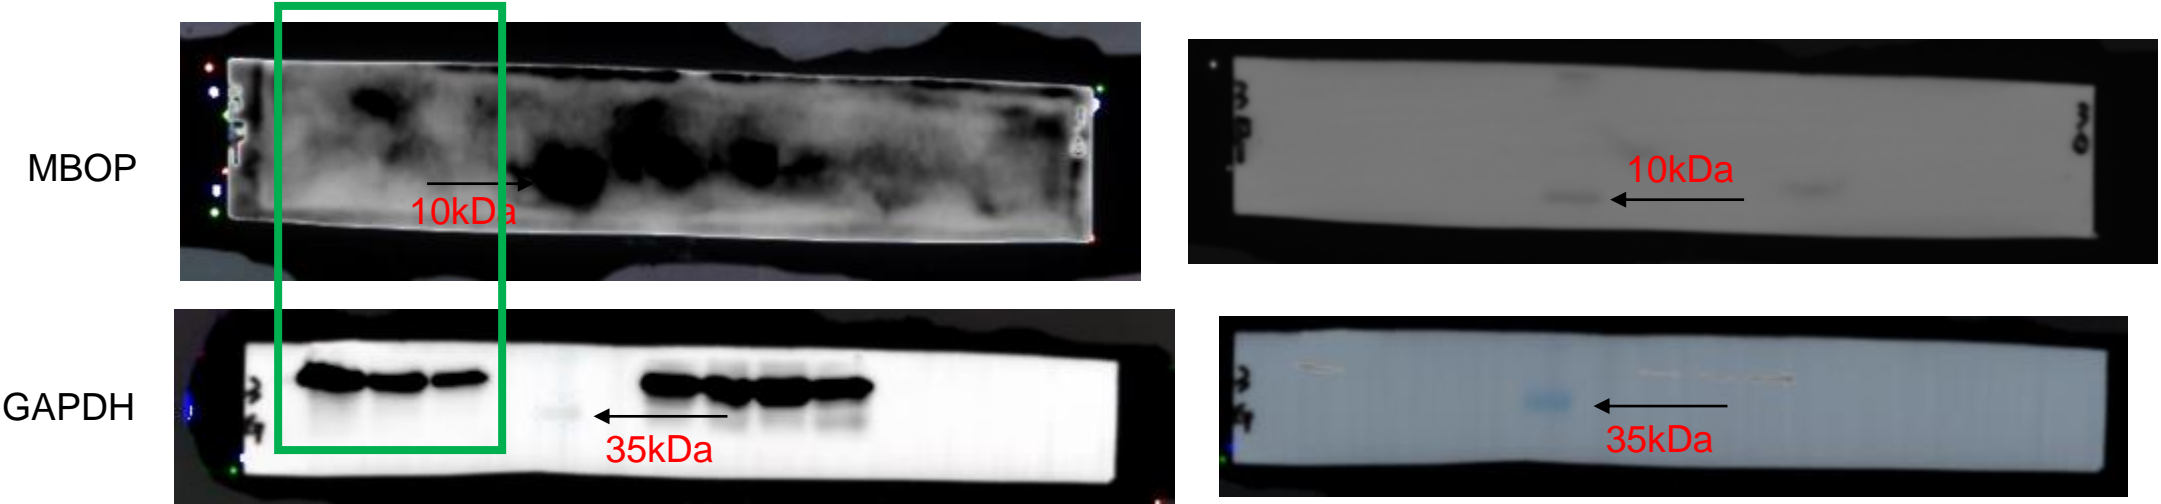



Fig. 4A

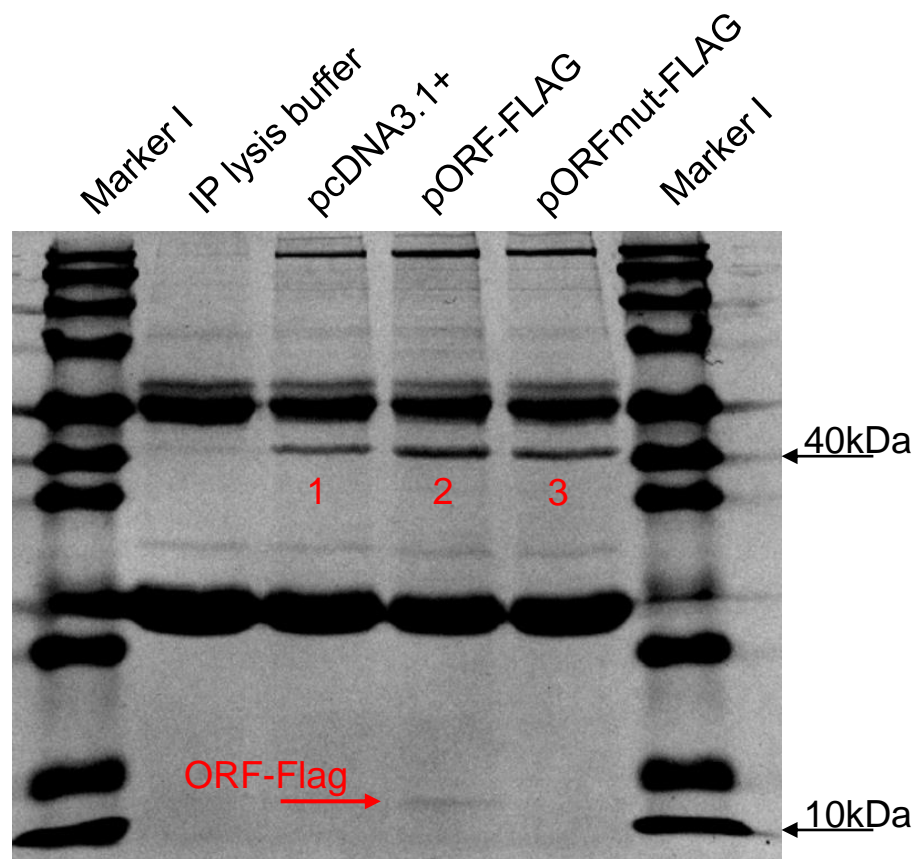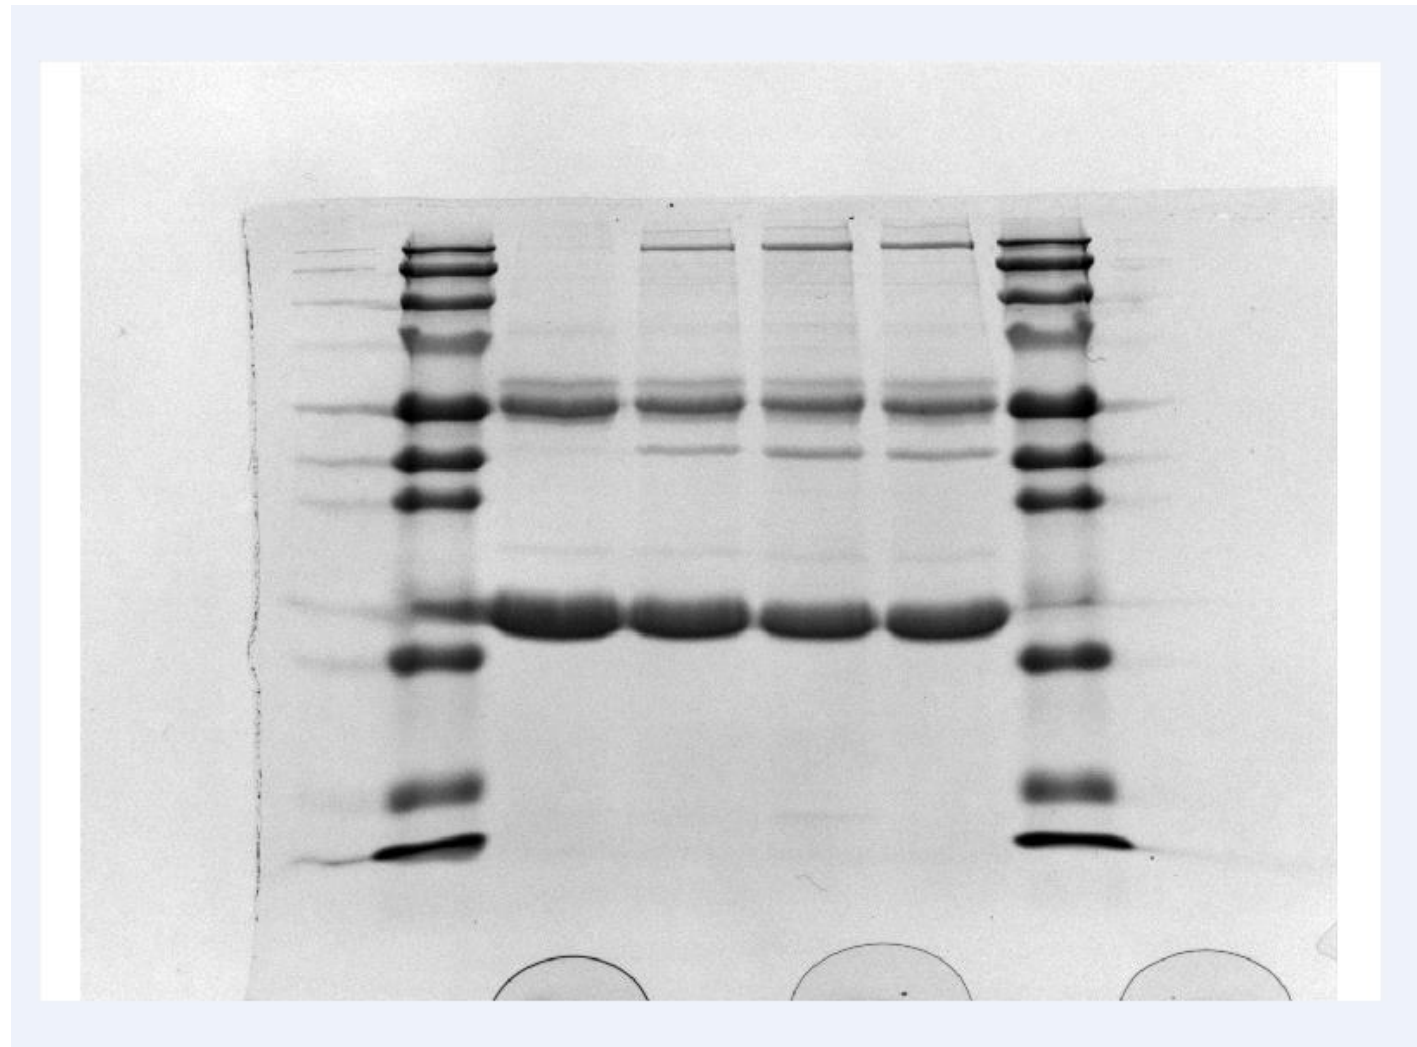



Fig. 4E upper panel

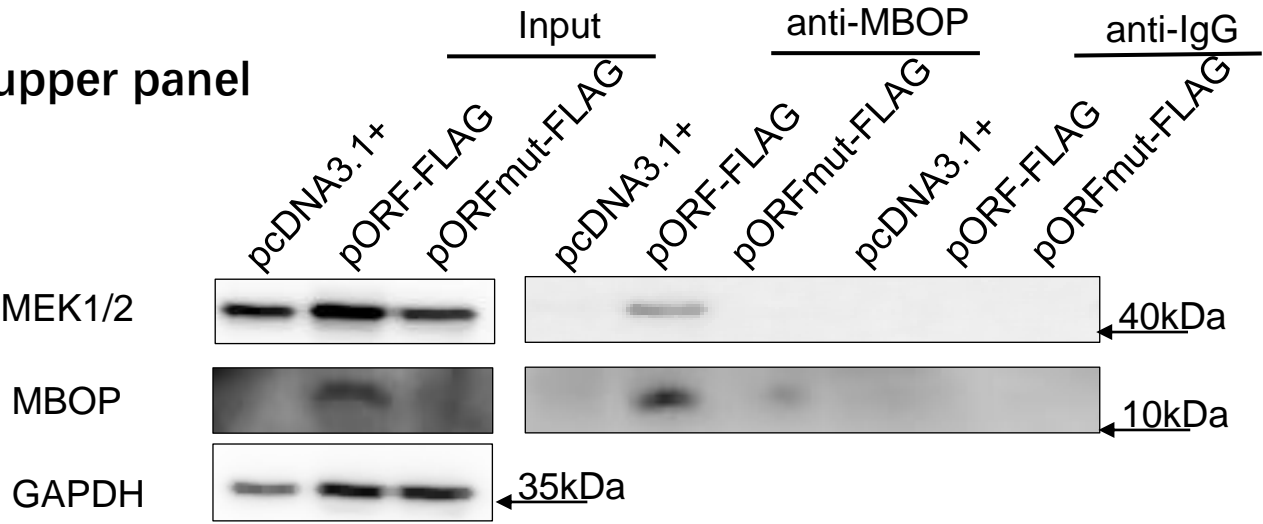

|                | pcDNA3.1 | pORF-FLAG | pORFm-FLAG |
|----------------|----------|-----------|------------|
| MEK1/2         | 40466    | 72761     | 49445      |
| MBOP           | 2816     | 6321      | 3312       |
| GAPDH          | 22592    | 34760     | 35716      |
| MEK1/2 / GAPDH | 1.791165 | 2.093239  | 1.384394   |
| RATIO1         | 1        | 1.168647  | 0.772901   |
| MBOP/GAPDH     | 0.124646 | 0.181847  | 0.092732   |
| Ratio2         | 1        | 1.458908  | 0.74396    |

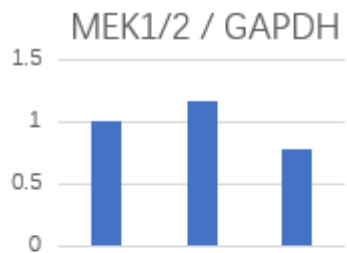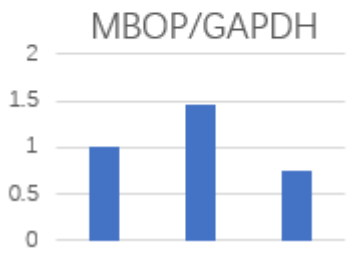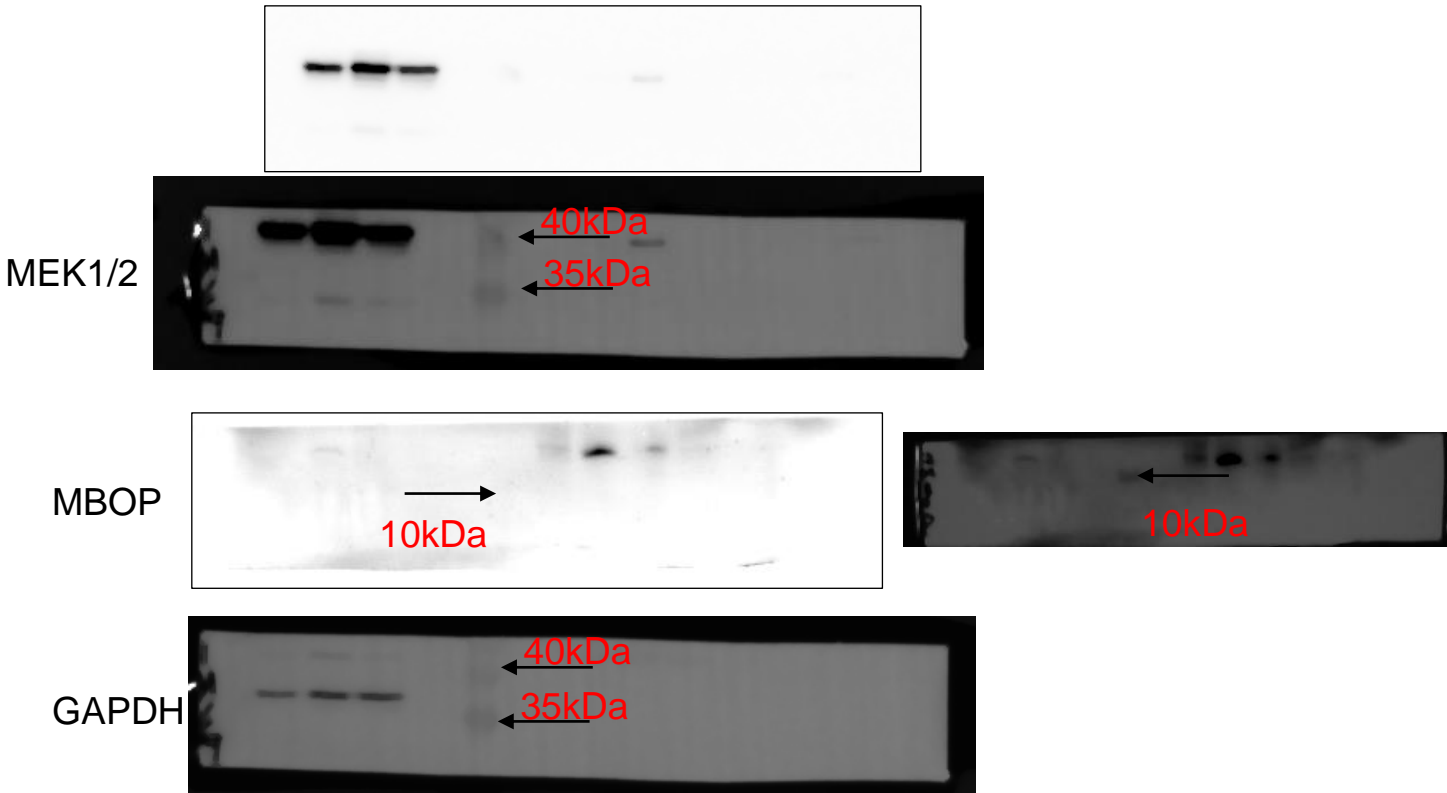

Fig. 4E lower panel

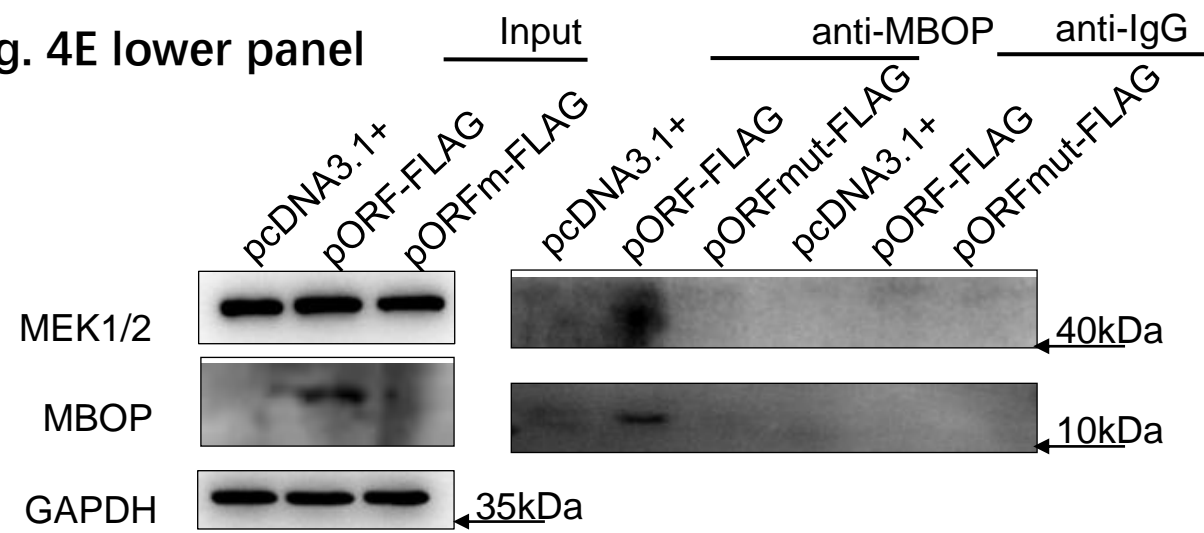

|                | pcDNA3.1 | pORF-FLA | pORFm-FLAG |
|----------------|----------|----------|------------|
| MEK1/2         | 1852834  | 2356890  | 1518417    |
| MBOP           | 857482   | 1175259  | 687920     |
| GAPDH          | 1524697  | 1565606  | 1457194    |
| MEK1/2 / GAPDH | 1.215215 | 1.505417 | 1.042014   |
| RATIO1         | 1        | 1.238808 | 0.857474   |
| MBOP/GAPDH     | 0.562395 | 0.750674 | 0.472085   |
| Ratio2         | 1        | 1.33478  | 0.83942    |

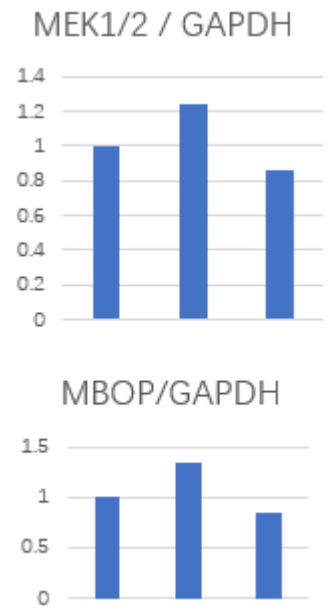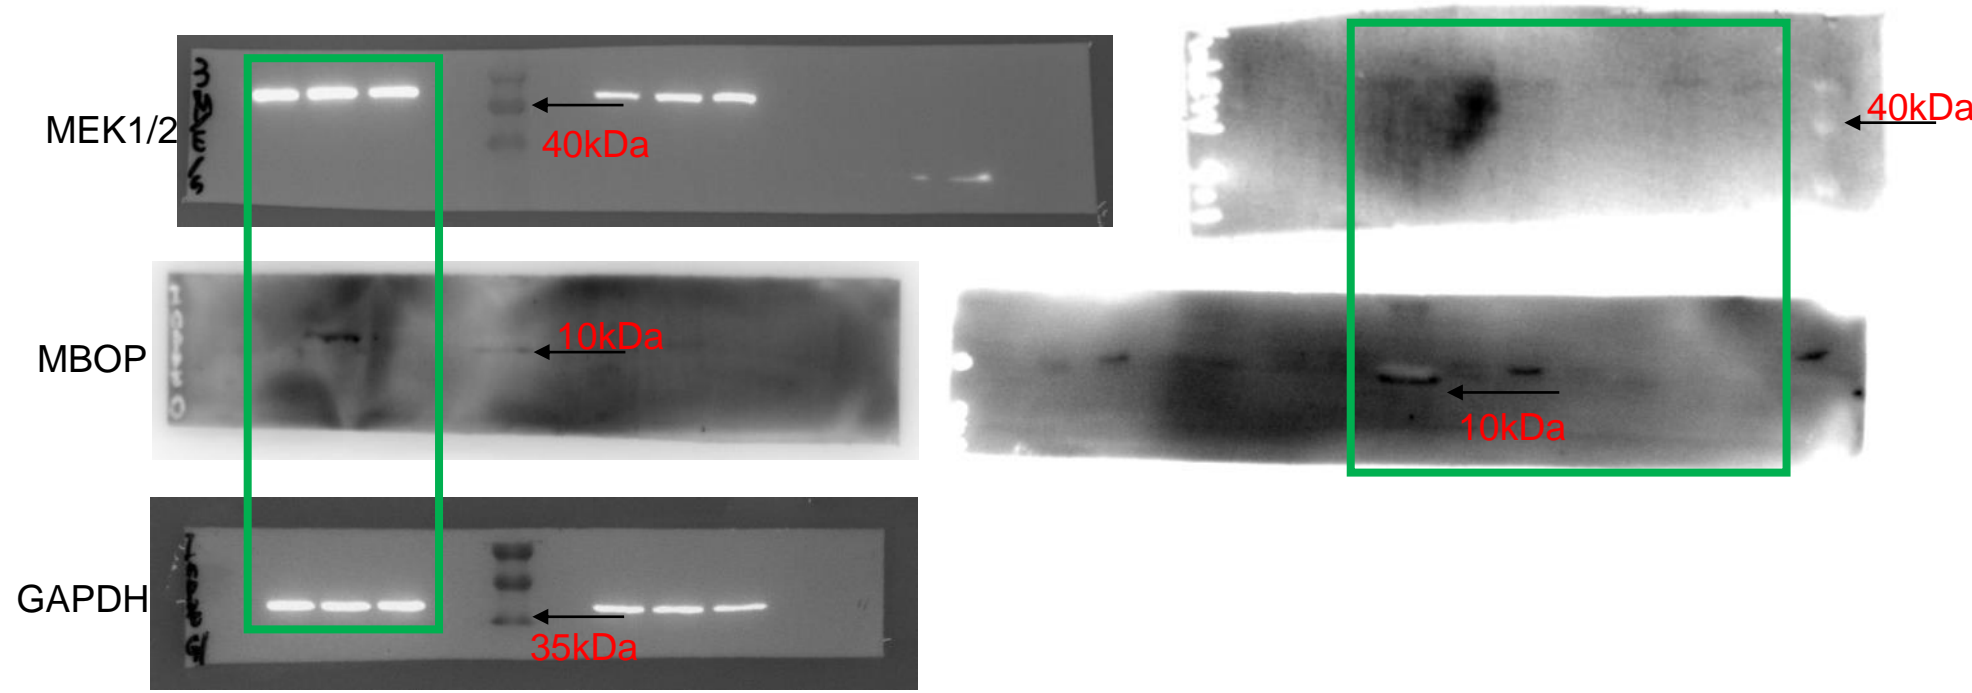

Fig. 4F upper panel

HCT116

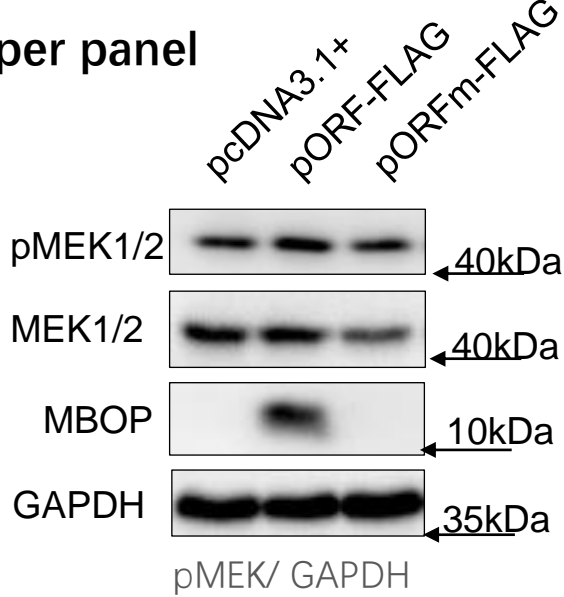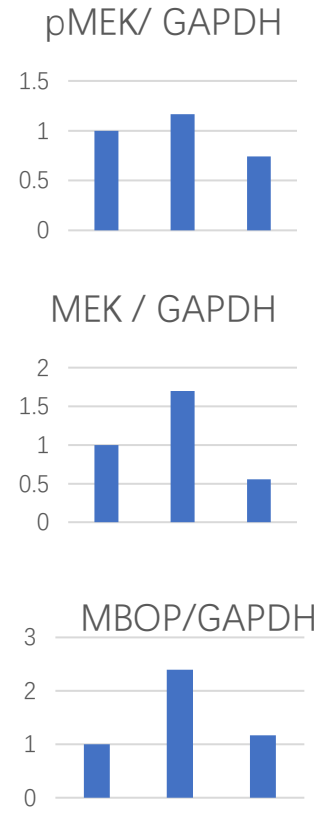

|                 | pcDNA3.1 | pORF-FLA | pORFm-FLAG |
|-----------------|----------|----------|------------|
| pMEK1/2         | 89599    | 89978    | 75321      |
| MEK1/2          | 119814   | 175177   | 75334      |
| MBOP            | 51023    | 105244   | 67504      |
| GAPDH           | 157932   | 135946   | 179041     |
| MBOP/GAPDH      | 0.323069 | 0.77416  | 0.377031   |
| Ratio 1         | 1        | 2.396266 | 1.167028   |
| pMEK1/2 / GAPDH | 0.567326 | 0.661866 | 0.420691   |
| Ratio 2         | 1        | 1.16664  | 0.741533   |
| MEK1/2 / GAPDH  | 0.758643 | 1.288578 | 0.420764   |
| Ratio 3         | 1        | 1.69853  | 0.554627   |

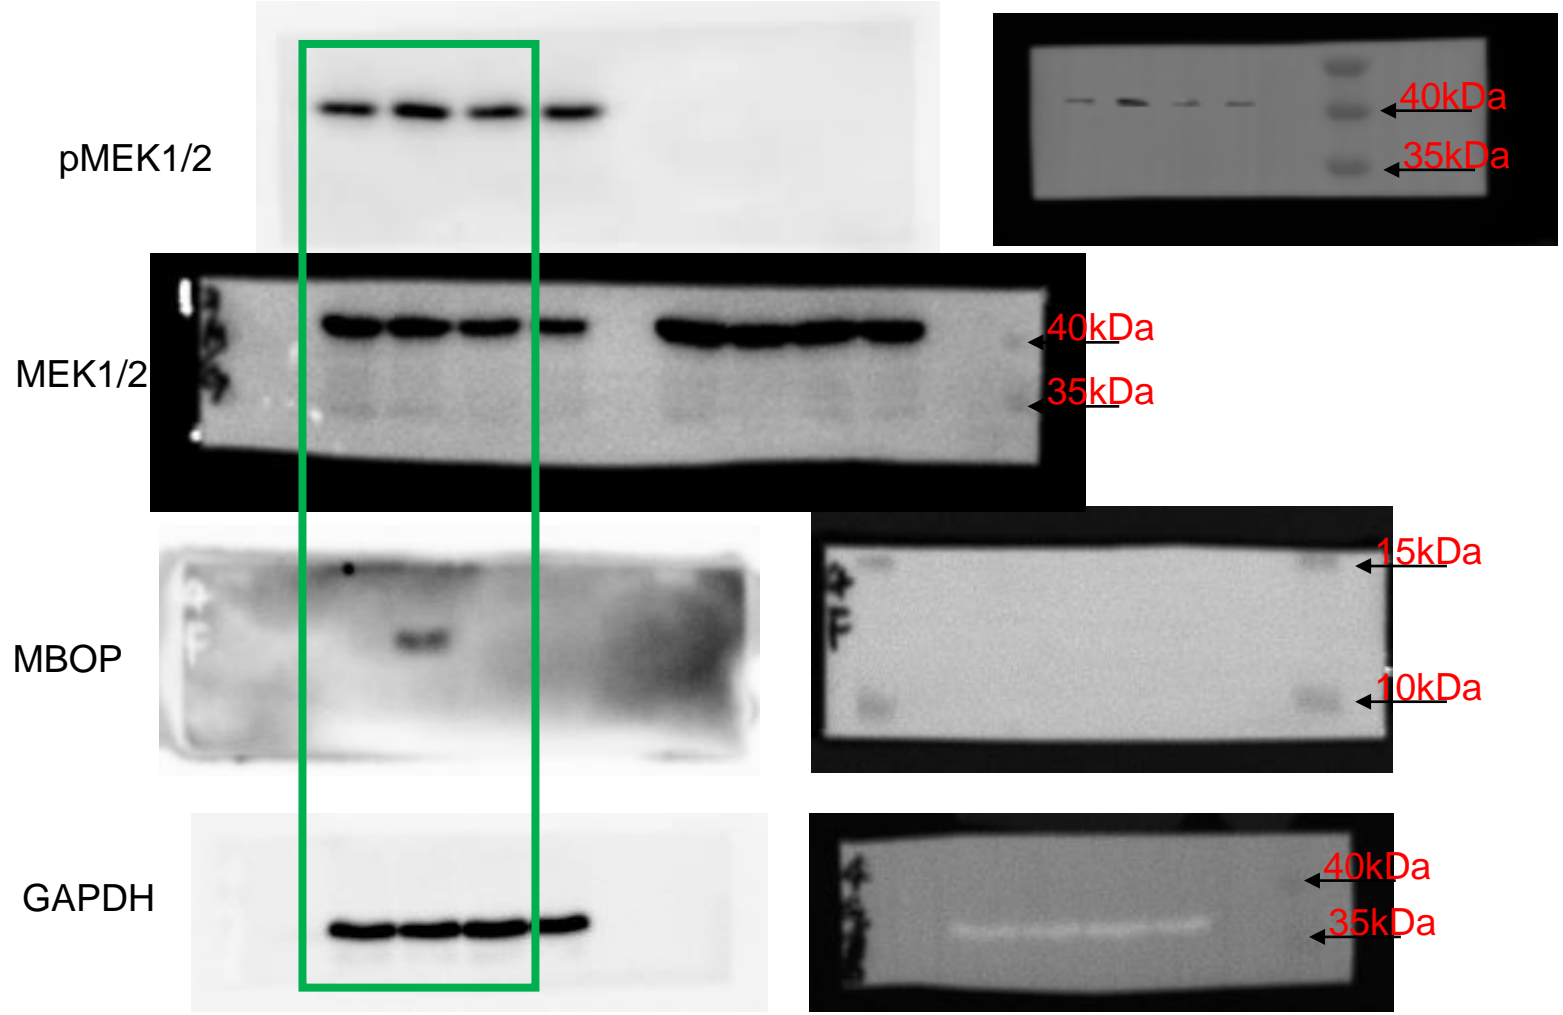

Fig. 4F lower panel

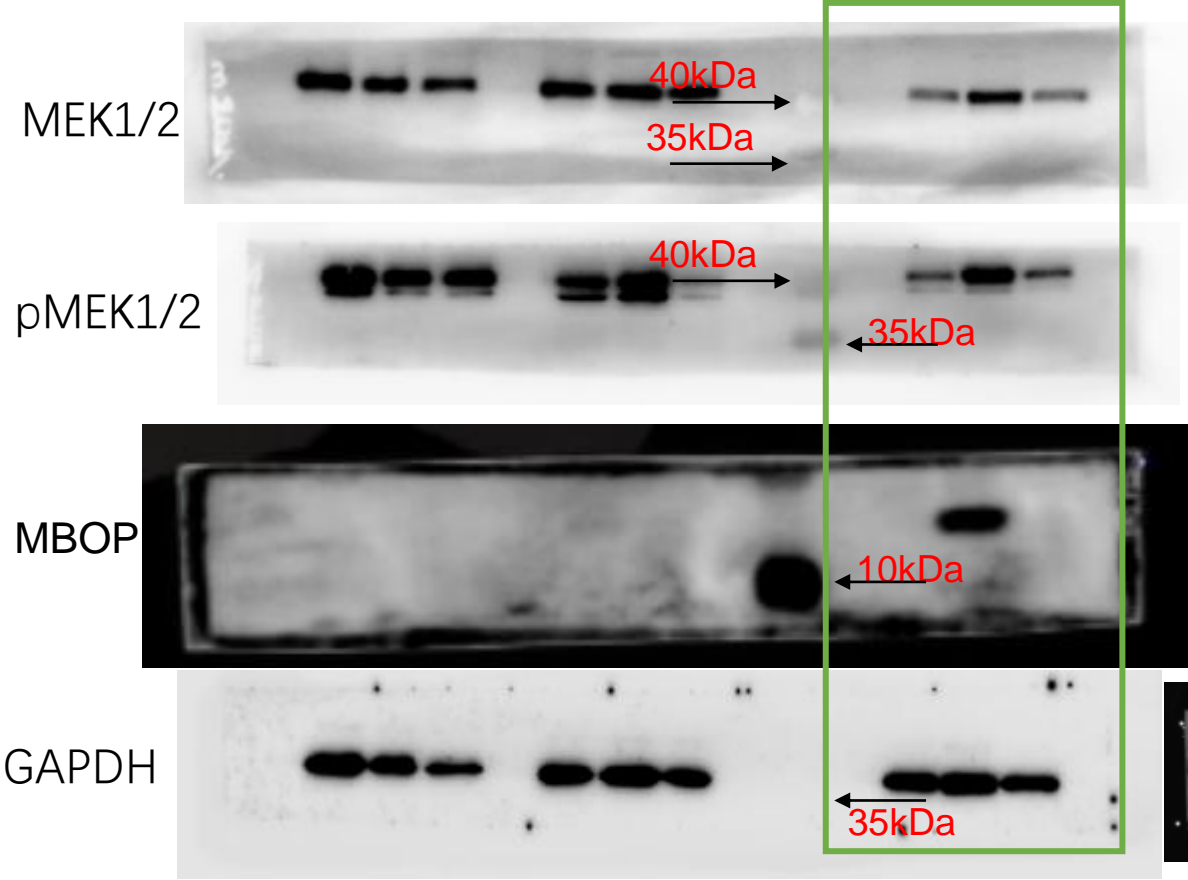

|                 | pcDNA3.1 | pORF-FLA | pORFm-FLAG |
|-----------------|----------|----------|------------|
| pMEK1/2         | 150238   | 288385   | 147839     |
| MEK1/2          | 37281    | 59978    | 25644      |
| MBOP            | 57120    | 147328   | 60979      |
| GAPDH           | 667673   | 606084   | 697396     |
| MBOP/GAPDH      | 0.085551 | 0.243082 | 0.087438   |
| Ratio 1         | 1        | 2.841372 | 1.02206    |
| pMEK1/2 / GAPDH | 0.225017 | 0.475817 | 0.211987   |
| Ratio 2         | 1        | 2.114579 | 0.942093   |
| MEK1/2 / GAPDH  | 0.055837 | 0.09896  | 0.036771   |
| Ratio 3         | 1        | 1.772293 | 0.658541   |

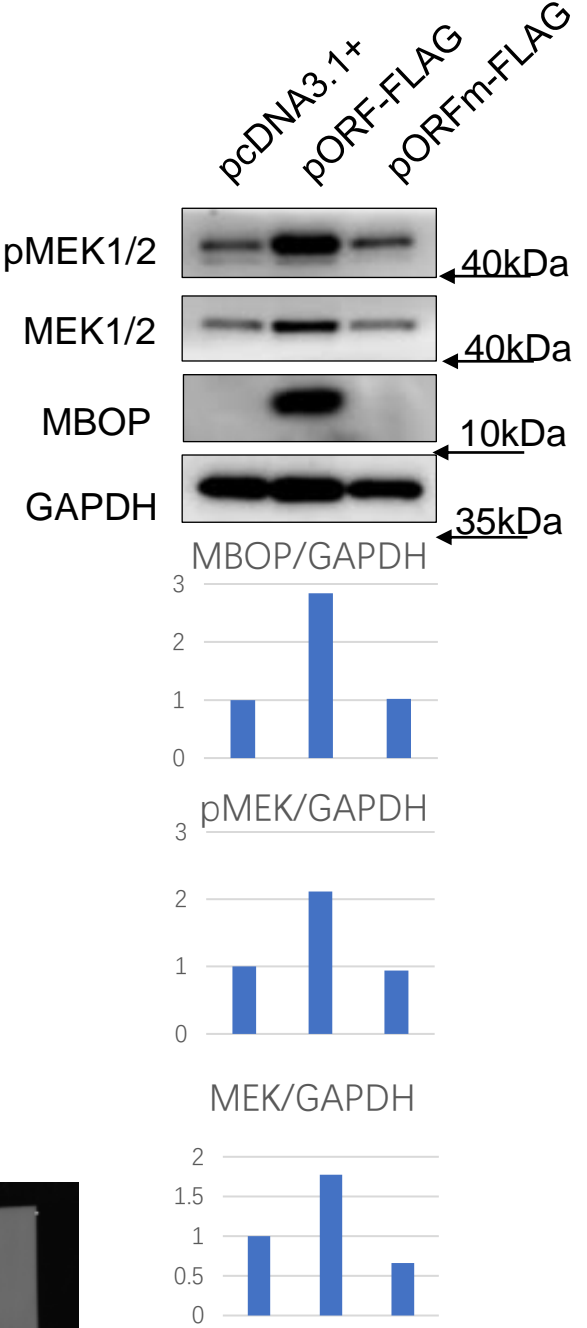

Fig. 5A LETF panel

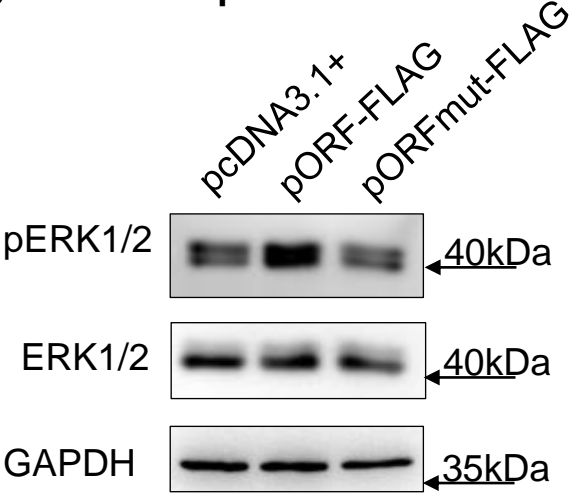

|                 | pcDNA3.1 | pORF-FLA | pORFm-FLAG |
|-----------------|----------|----------|------------|
| pERK1/2         | 55923    | 68138    | 53691      |
| ERK1/2          | 43578    | 46991    | 45522      |
| GAPDH           | 432256   | 442802   | 415193     |
| pERK1/2 to GAPD | 0.129375 | 0.153879 | 0.129316   |
| Ratio1          | 1        | 1.189407 | 0.999544   |
| ERK1/2 to GAPDH | 0.100815 | 0.106122 | 0.109641   |
| Ratio2          | 1        | 1.052638 | 1.08754    |

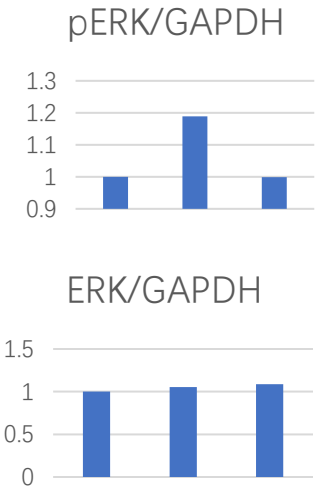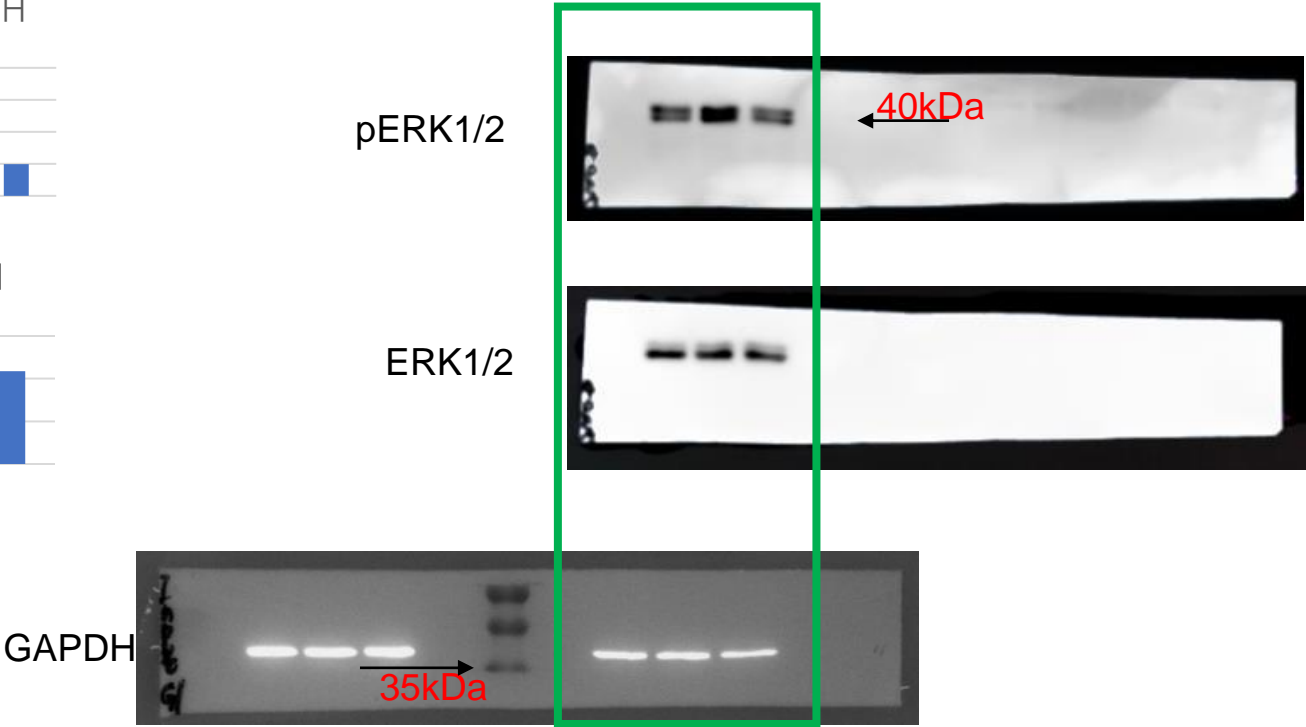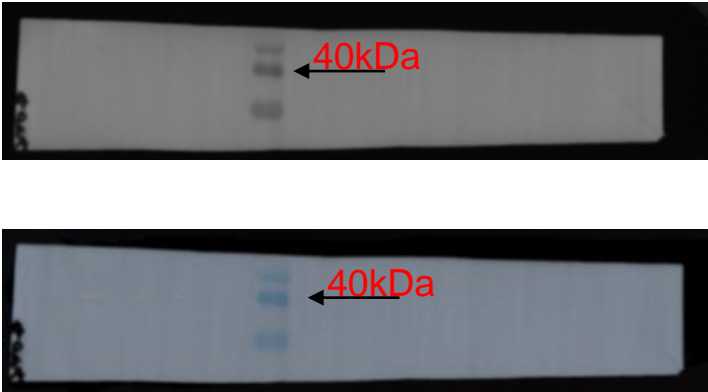

Fig. 5A RIGHT panel

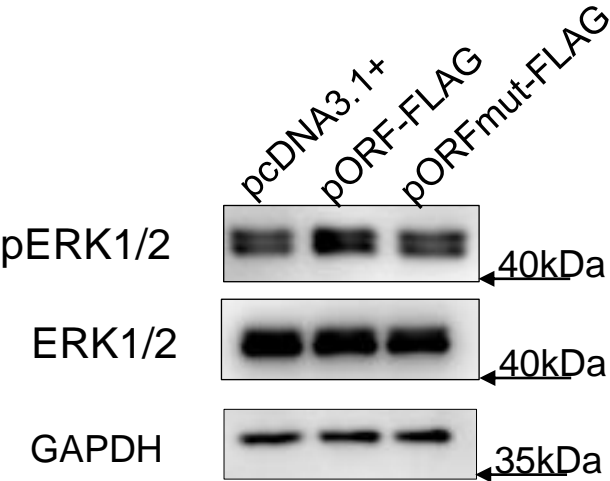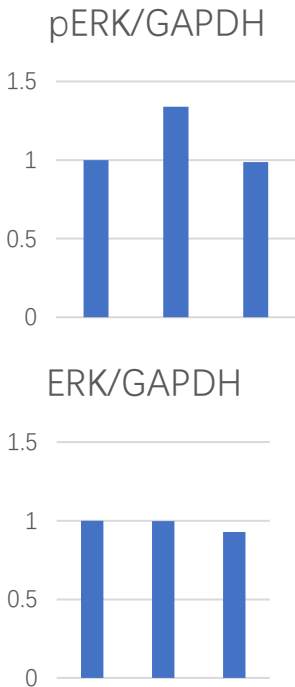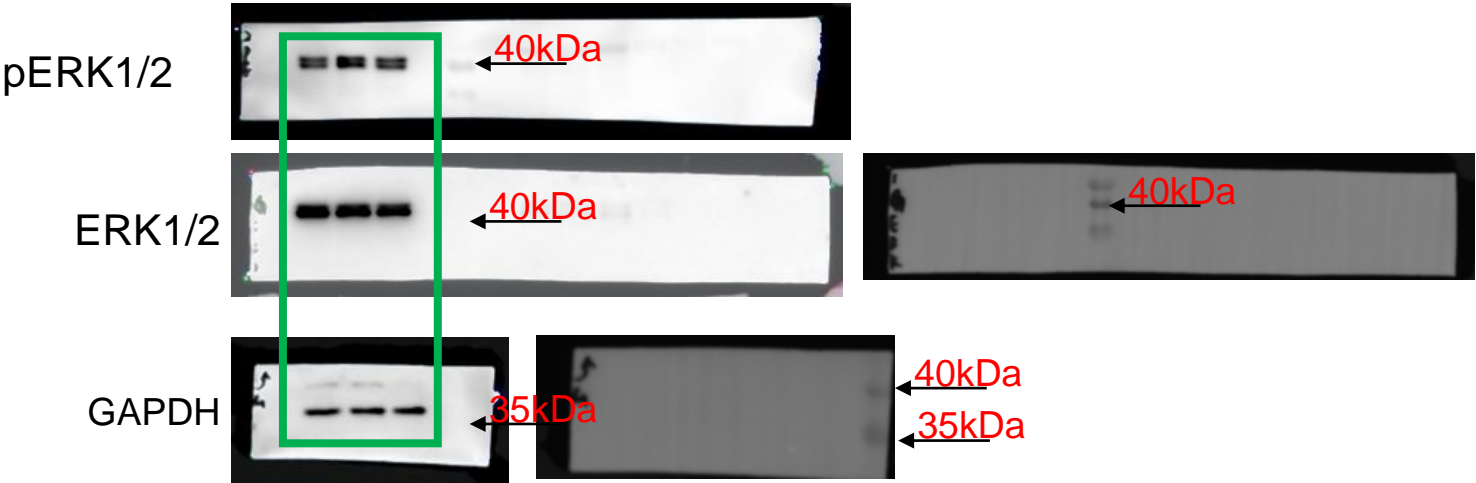

|                 | pcDNA3.1 | pORF-FLA | pORFm-FLAG |
|-----------------|----------|----------|------------|
| pERK1/2         | 55300    | 74662    | 54046      |
| ERK1/2          | 64535    | 64996    | 59350      |
| GAPDH           | 207750   | 209700   | 205711     |
| pERK1/2 to GAPD | 0.266185 | 0.356042 | 0.262728   |
| Ratio1          | 1        | 1.337572 | 0.987011   |
| ERK1/2 to GAPDH | 0.310638 | 0.309948 | 0.288512   |
| Ratio2          | 1        | 0.997778 | 0.928772   |

Fig. 5B LETF panel

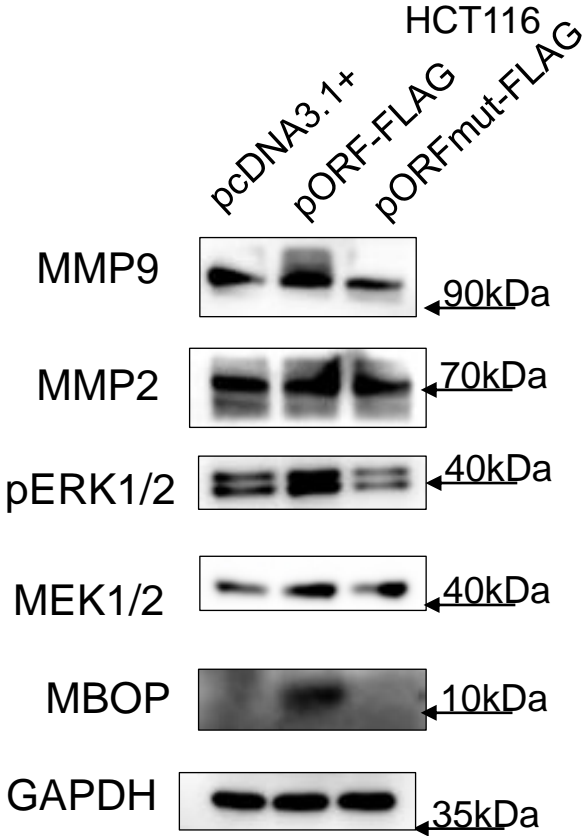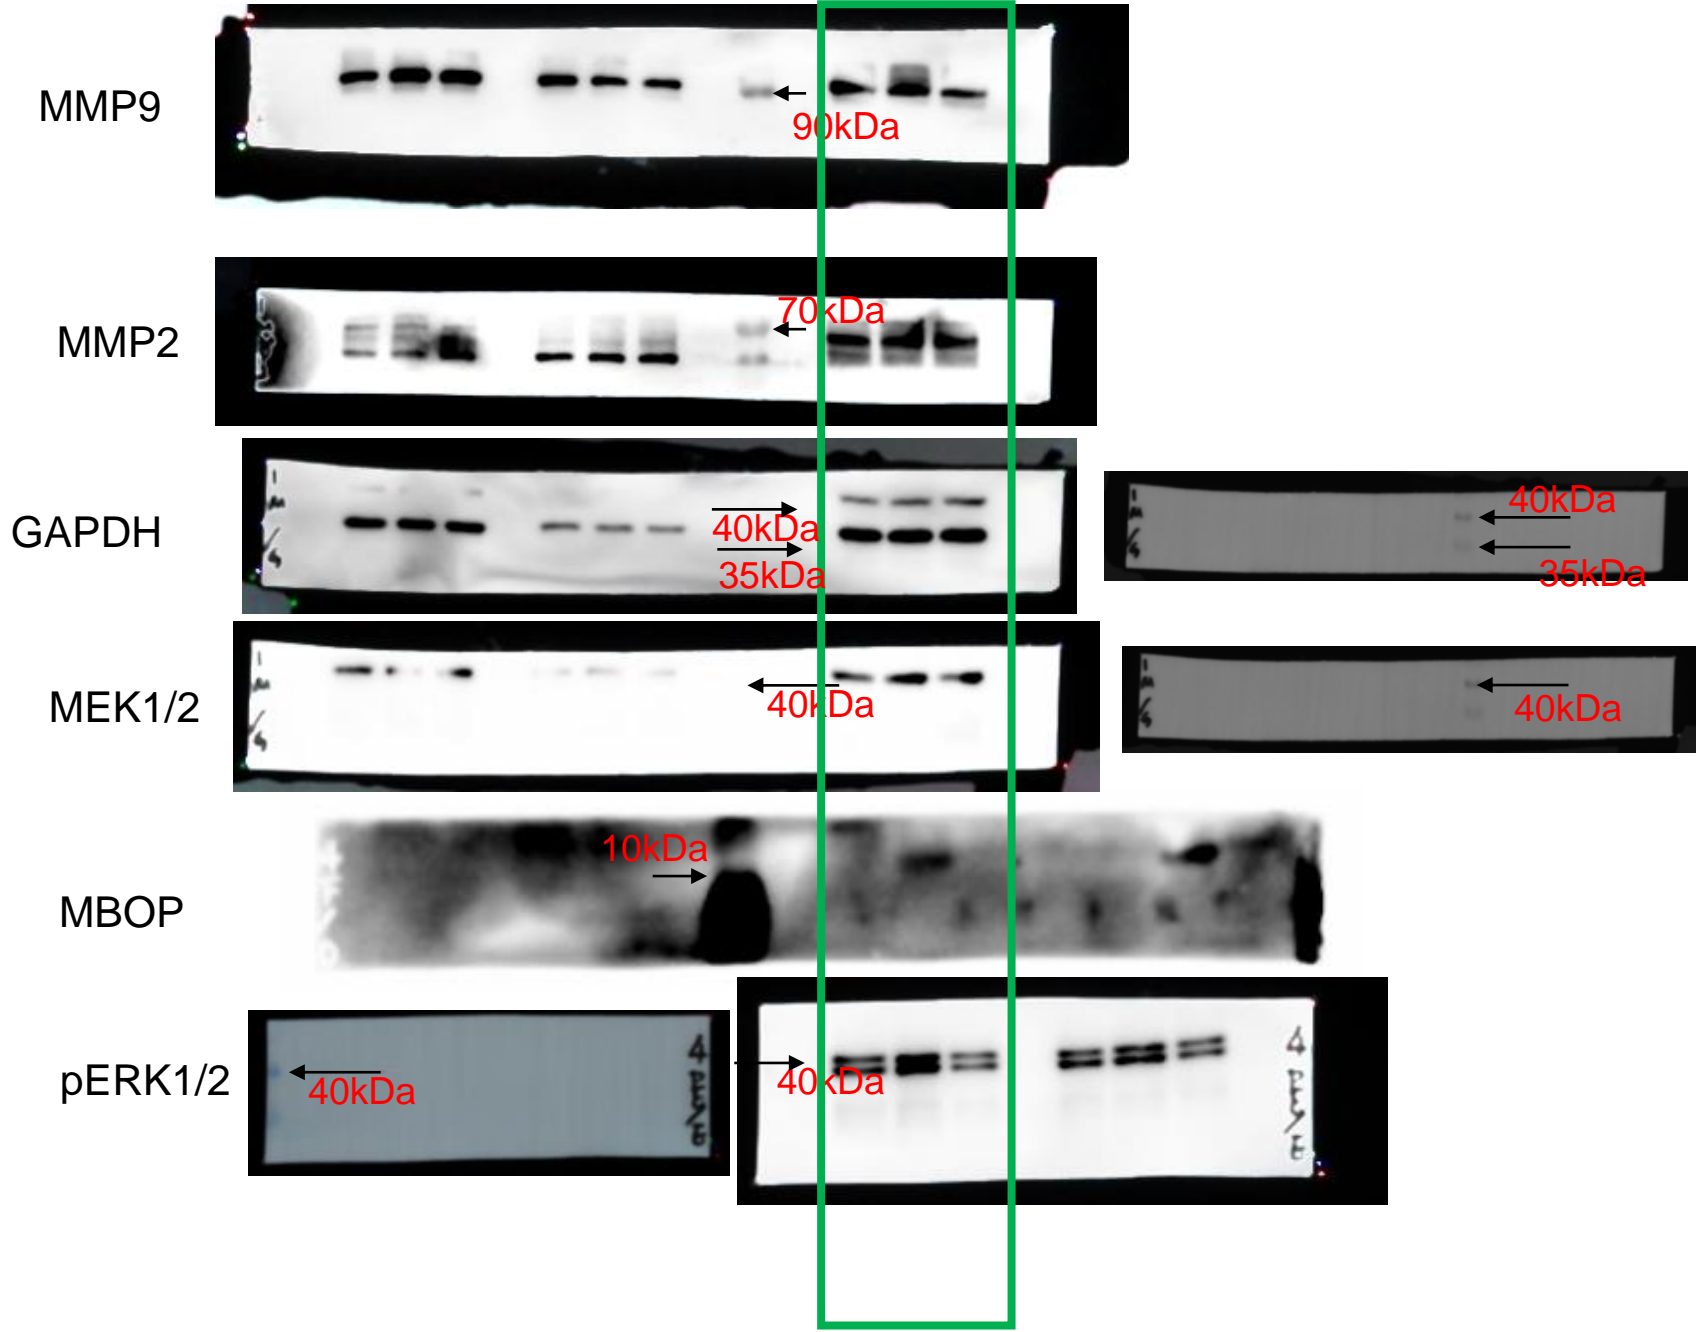



Fig. 5B RIGHT panel

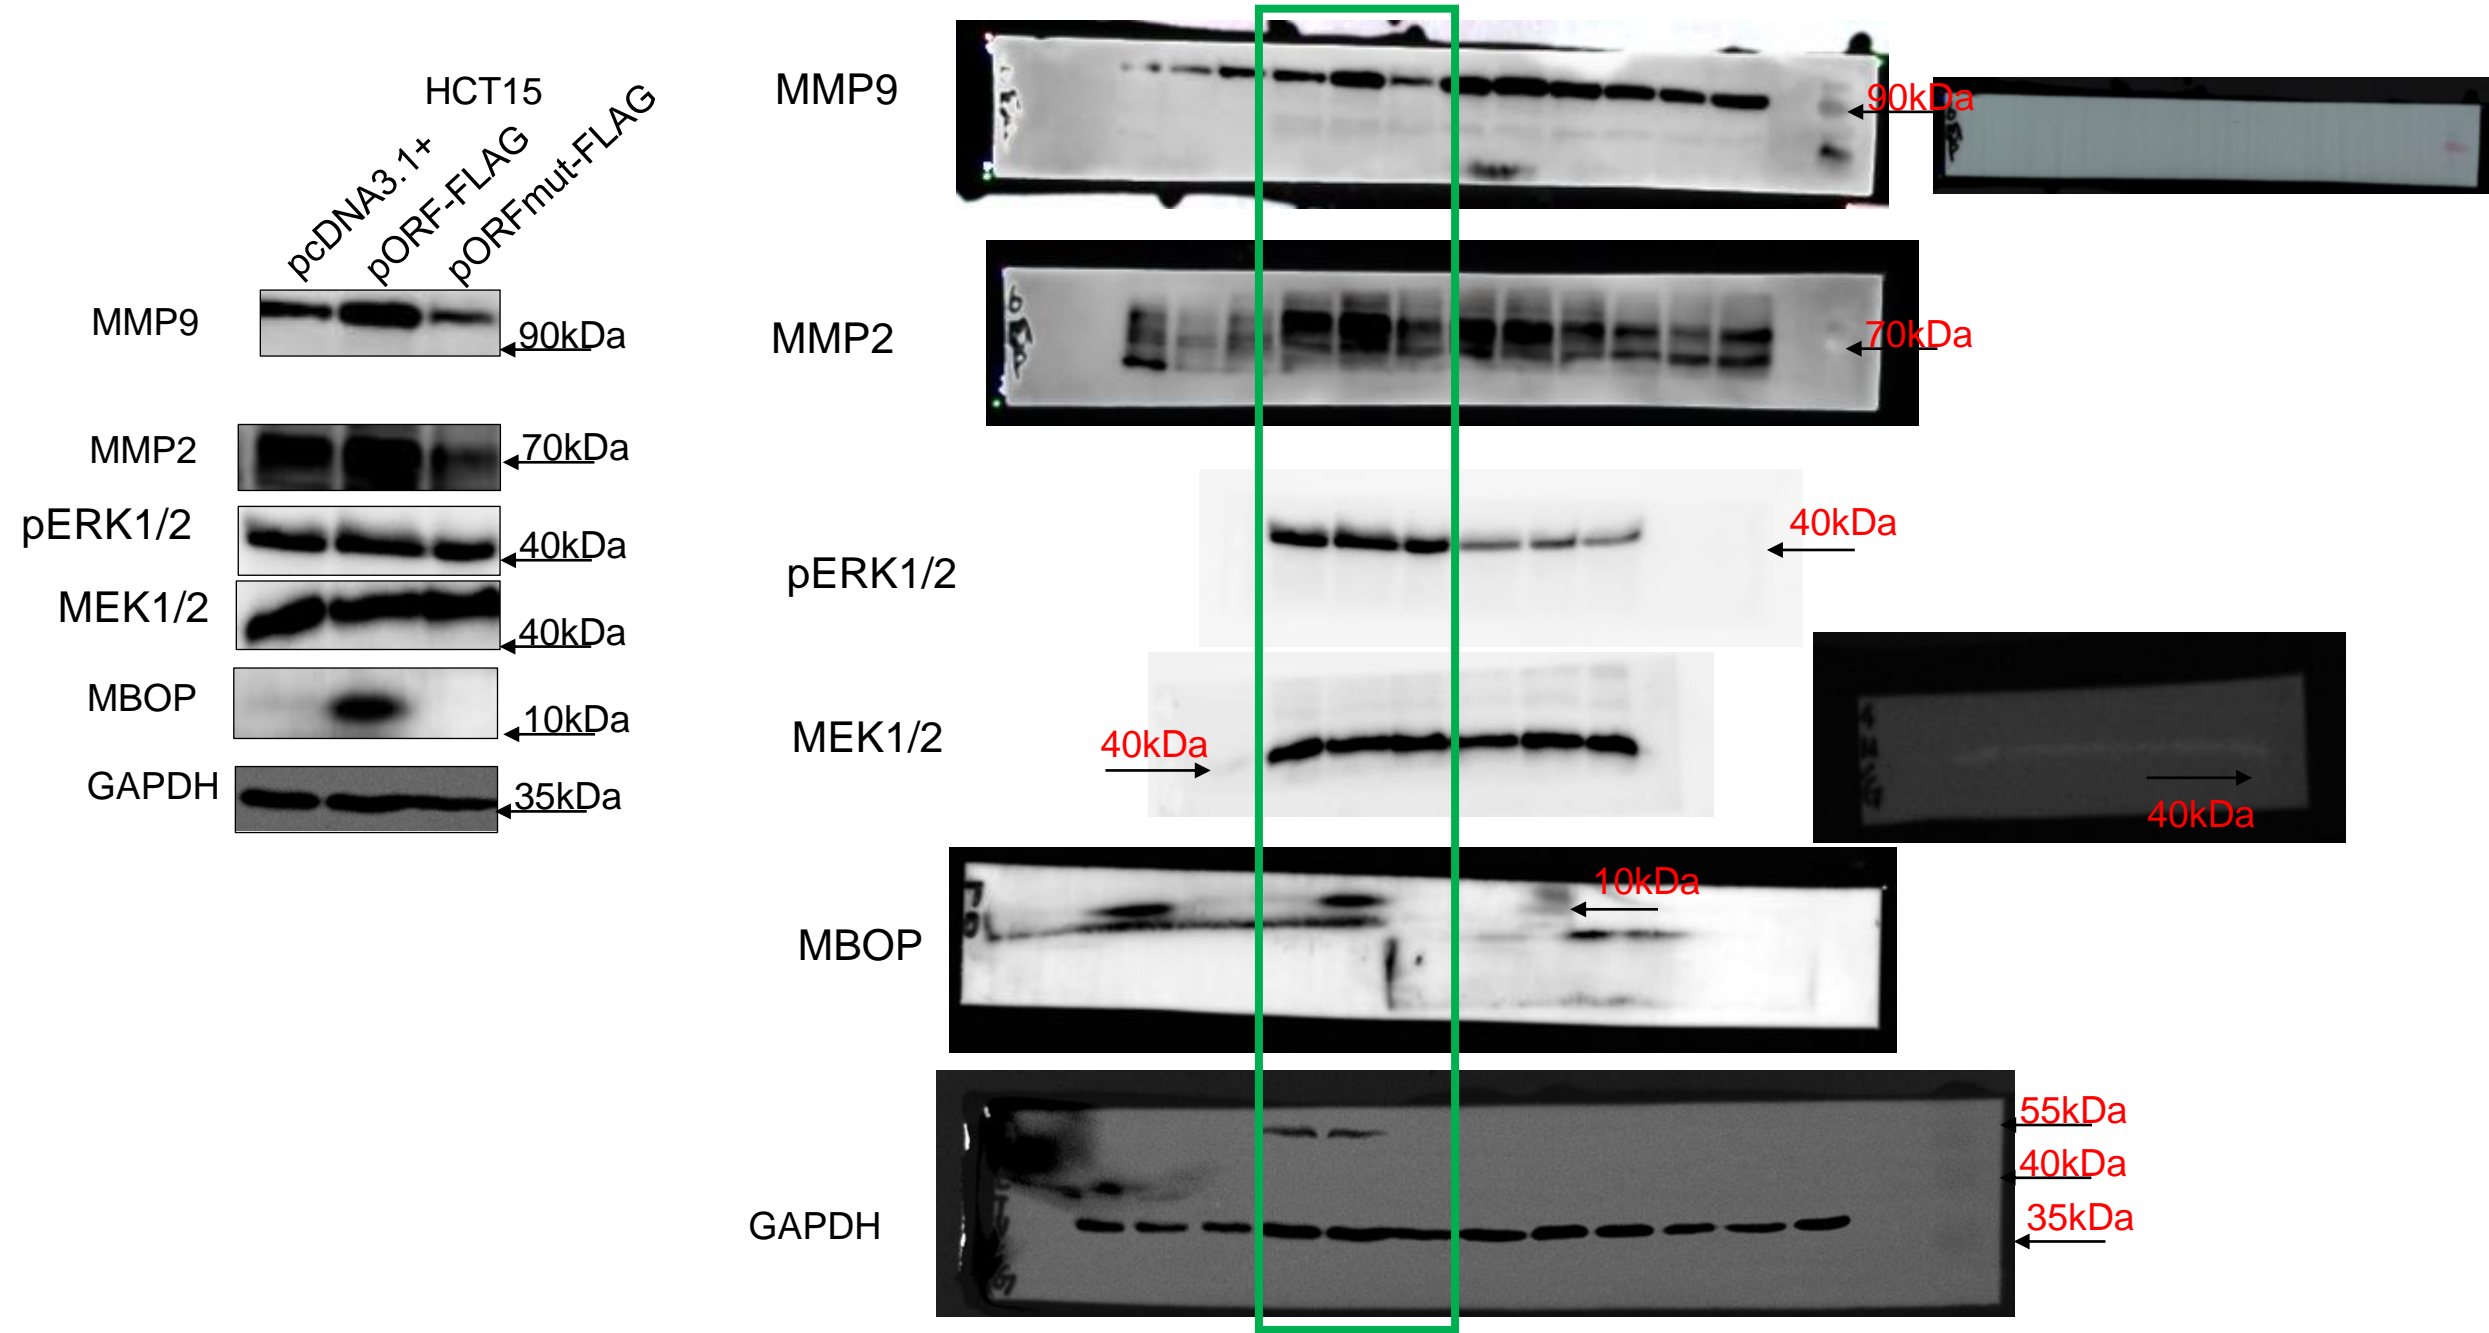



Fig. 5B LETF panel

| HCT116 | pcDNA3.1 | pORF-FLA | pORFmut-FLAG |
|--------|----------|----------|--------------|
| MMP9   | 97991    | 160487   | 90516        |
| MMP2   | 91827    | 124863   | 94603        |
| pERK   | 76516    | 90722    | 49964        |
| MEK    | 23041    | 36633    | 28007        |
| MBOP   | 115718   | 166193   | 106193       |
| GAPDH  | 93618    | 101434   | 108044       |
| MMP9/G | 1.046711 | 1.582182 | 0.83777      |
| Ratio1 | 1        | 1.511574 | 0.800383     |
| MMP2/G | 0.980869 | 1.230978 | 0.875597     |
| Ratio2 | 1        | 1.254987 | 0.892675     |
| pERK/G | 0.817321 | 0.894394 | 0.462441     |
| Ratio3 | 1        | 1.094299 | 0.565801     |
| MEK/G  | 0.246117 | 0.361151 | 0.259218     |
| Ratio4 | 1        | 1.467395 | 1.053232     |
| MBOP/G | 1.236066 | 1.638435 | 0.982868     |
| Ratio5 | 1        | 1.325524 | 0.795158     |

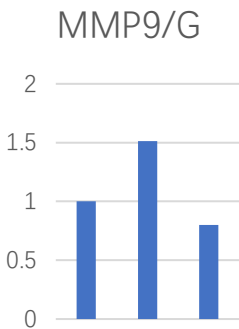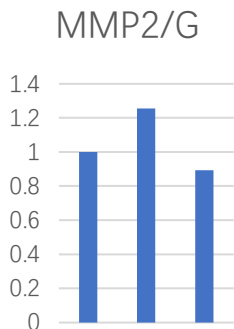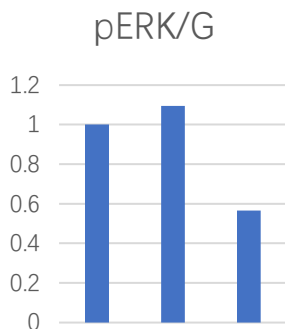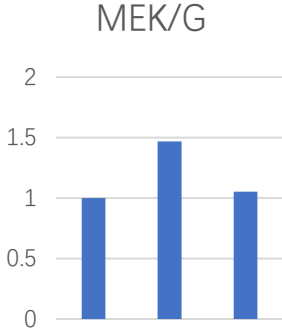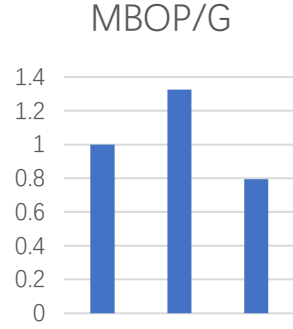

Fig. 5B RIGHT panel

| HCT15  | pcDNA3.1 | pORF-FLA | pORFmut-FLAG |
|--------|----------|----------|--------------|
| MMP9   | 55220    | 84879    | 42808        |
| MMP2   | 118646   | 166067   | 102514       |
| pERK   | 276341   | 348763   | 219093       |
| MEK    | 319979   | 369248   | 316648       |
| MBOP   | 125205   | 333368   | 122178       |
| GAPDH  | 321706   | 328406   | 318262       |
| MMP9/G | 0.171647 | 0.258458 | 0.134506     |
| Ratio1 | 1        | 1.505747 | 0.783615     |
| MMP2/G | 0.368803 | 0.505676 | 0.322106     |
| Ratio2 | 1        | 1.371129 | 0.873382     |
| pERK/G | 0.858986 | 1.061987 | 0.688405     |
| Ratio3 | 1        | 1.236326 | 0.801415     |
| MEK/G  | 0.994632 | 1.124364 | 0.994929     |
| Ratio4 | 1        | 1.130433 | 1.000299     |
| MBOP/G | 0.389191 | 1.015109 | 0.383891     |
| Ratio5 | 1        | 2.608257 | 0.986383     |

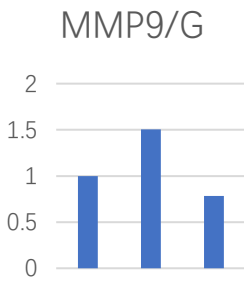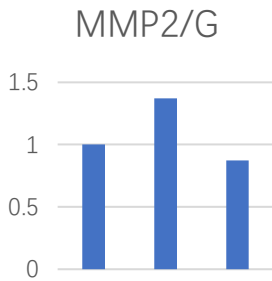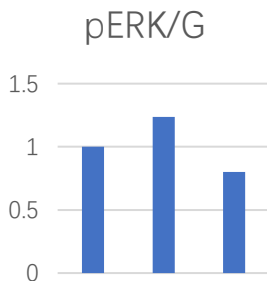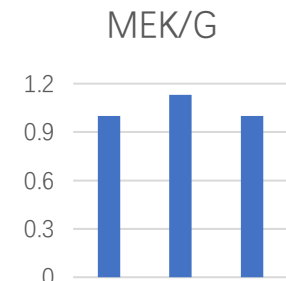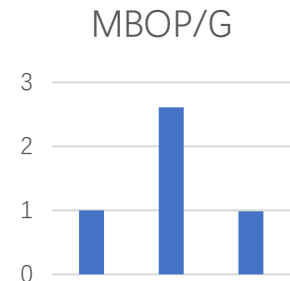

Fig. 5C

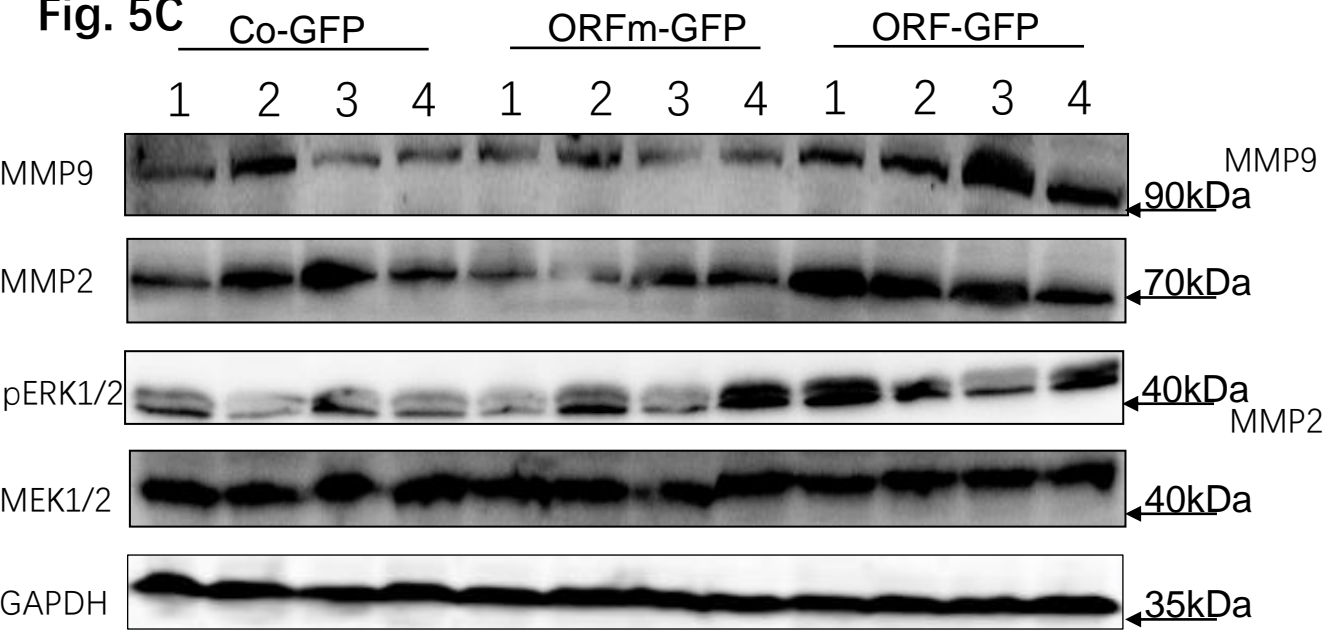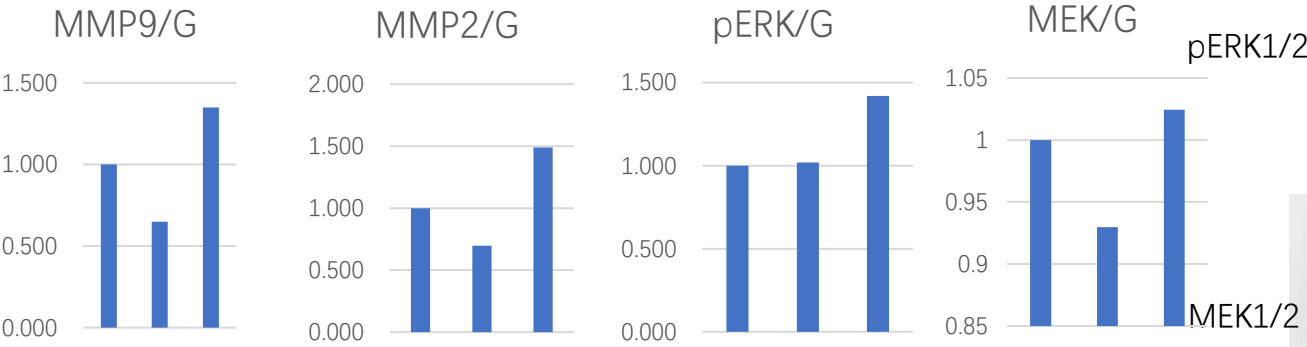

|         | co-GFP    | ORFm-GFP   | ORF-GFP   |
|---------|-----------|------------|-----------|
| MMP9    | 953662    | 636150     | 1214527   |
| MMP2    | 493569    | 354188     | 694467    |
| pERK1/2 | 840178    | 879569     | 1125396   |
| MEK1/2  | 983365    | 940154     | 951449    |
| GAPDH   | 382707    | 393520     | 361475    |
| MMP9/G  | 2.4918854 | 1.61656333 | 3.3599198 |
| Ratio1  | 1.000     | 0.649      | 1.348     |
| MMP2/G  | 1.290     | 0.900      | 1.921     |
| Ratio2  | 1.000     | 0.698      | 1.490     |
| pERK/G  | 2.195     | 2.235      | 3.113     |
| Ratio3  | 1.000     | 1.018      | 1.418     |
| MEK/G   | 2.569     | 2.389      | 2.632     |
| Ratio4  | 1         | 0.92978781 | 1.0243748 |

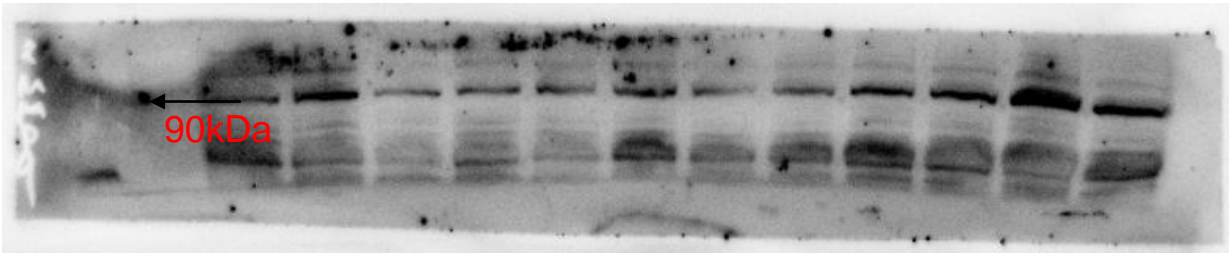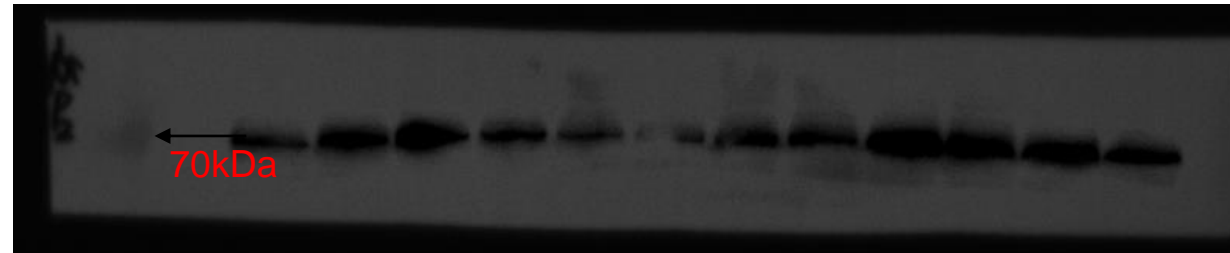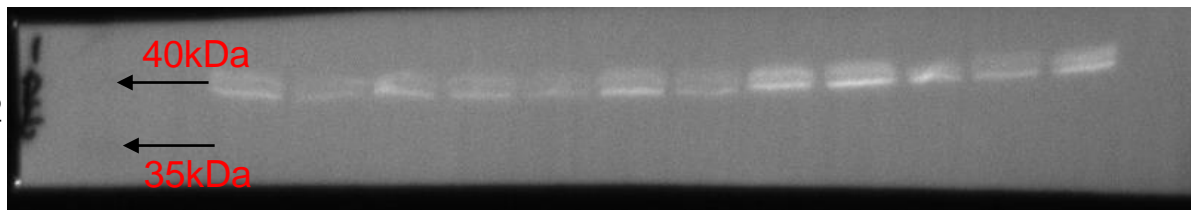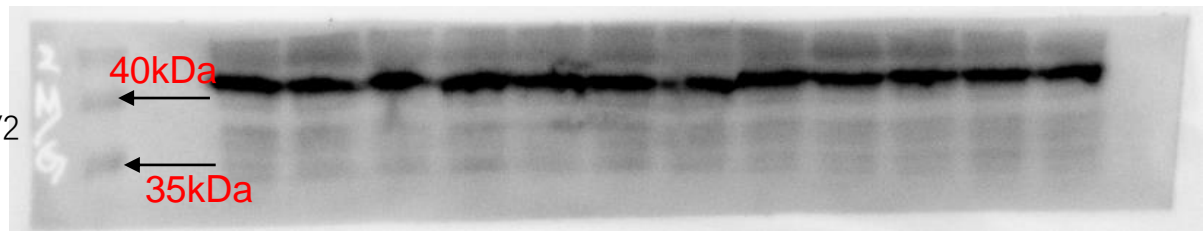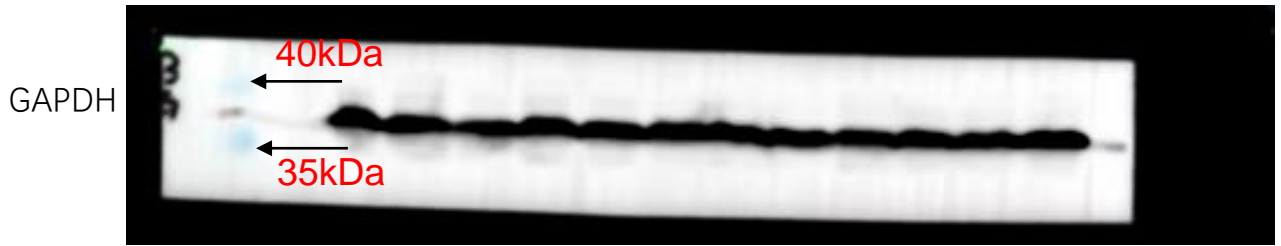

Fig. 5D

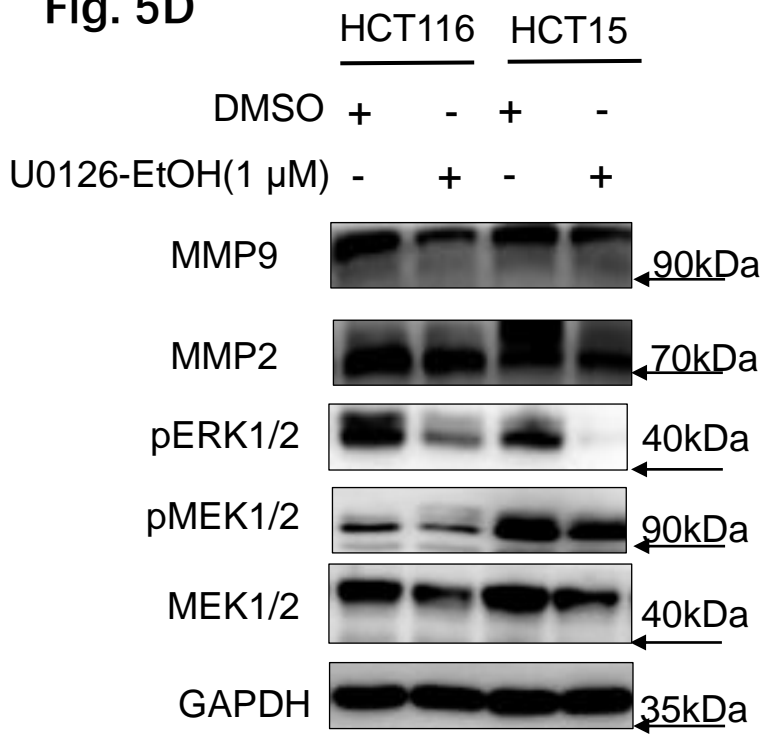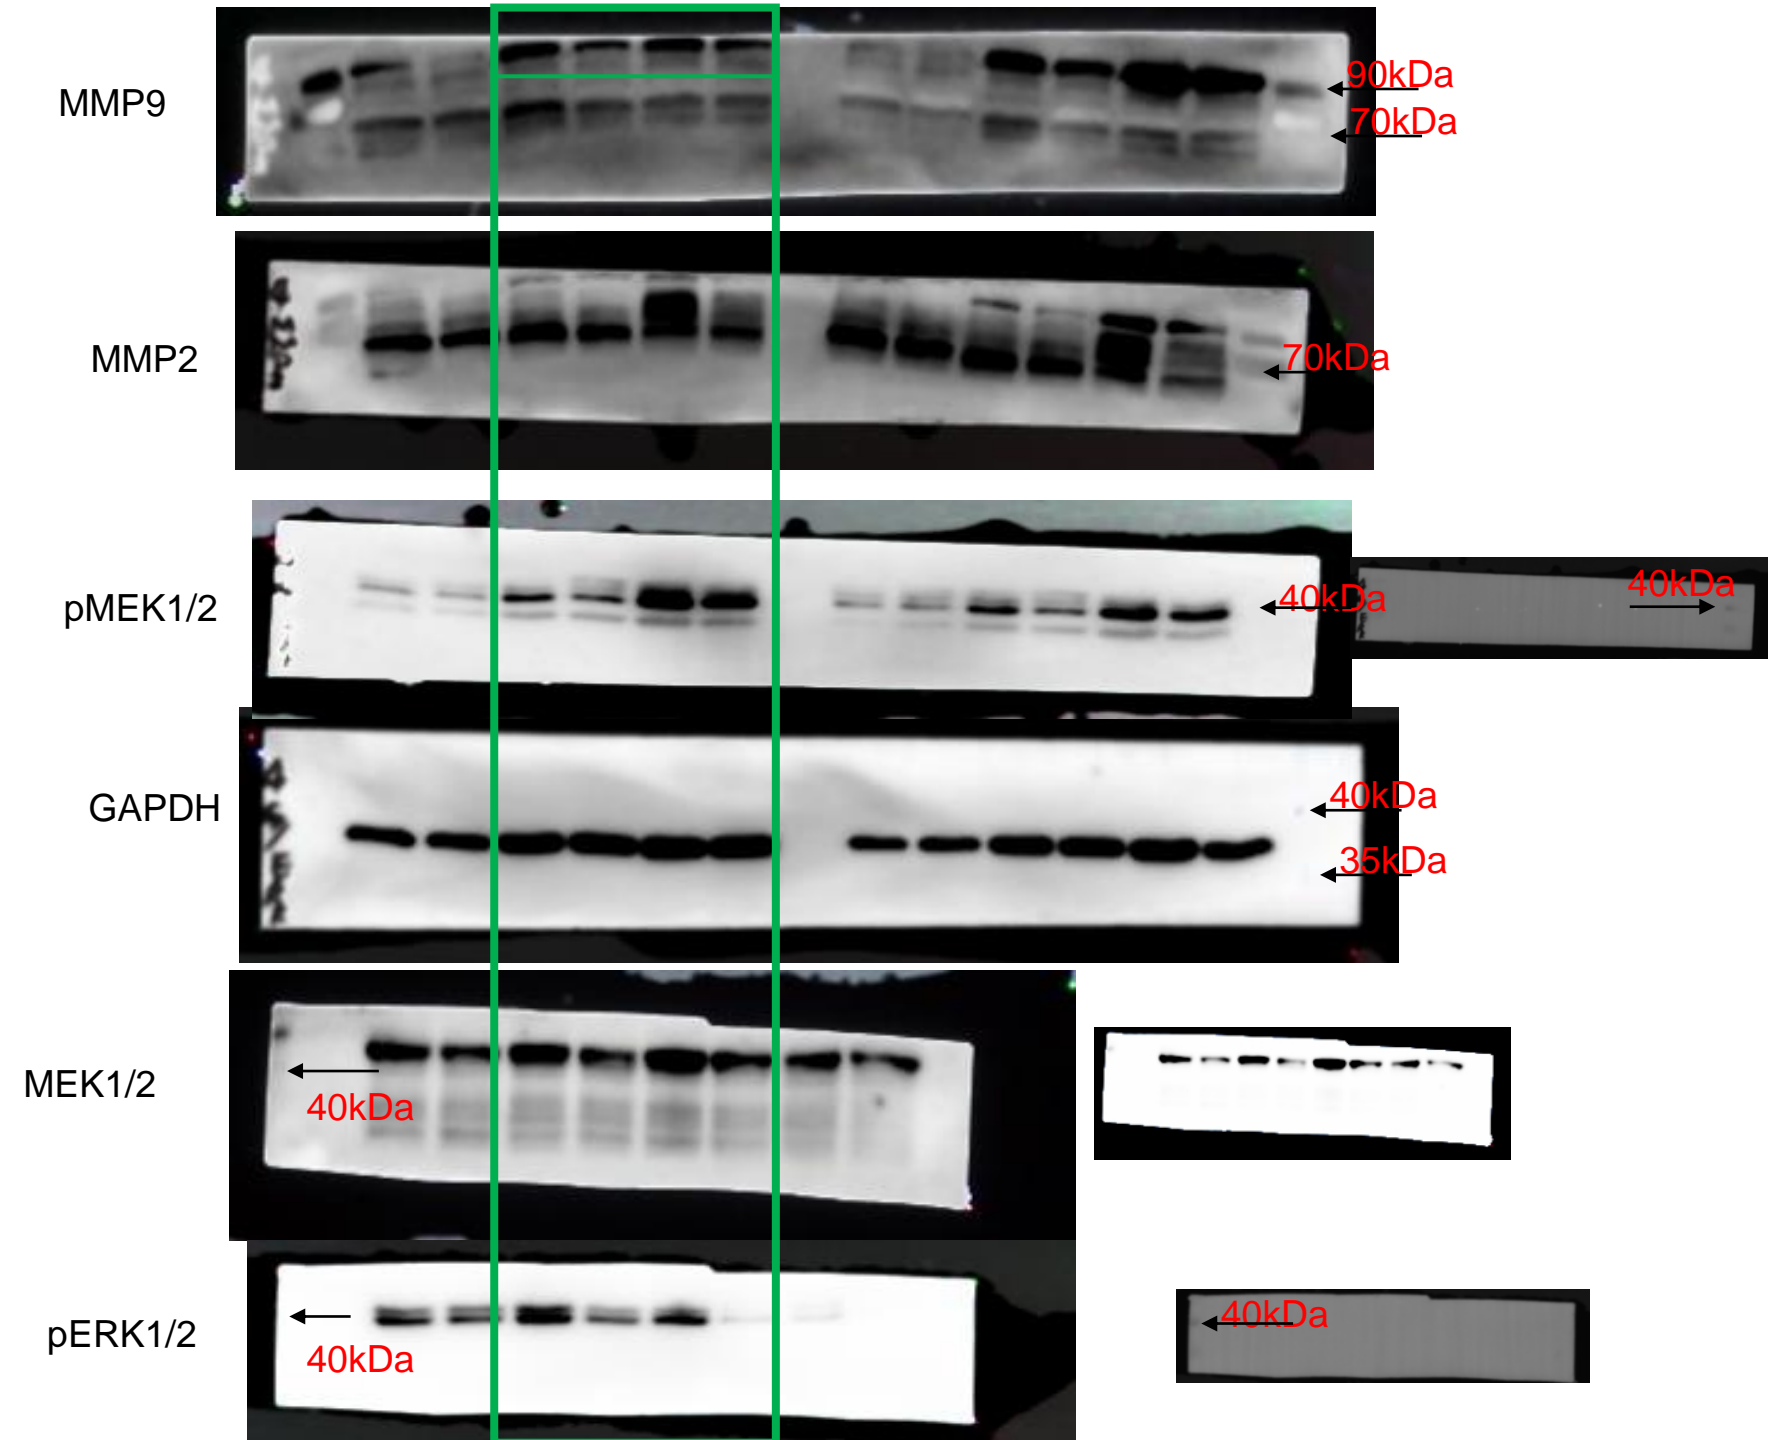

Fig. 5D

|            | DMSO      | U0126-EtOH | DMSO      | U0126-EtOH |
|------------|-----------|------------|-----------|------------|
| MMP9       | 86236     | 46614      | 73919     | 53710      |
| MMP2       | 66910     | 58407      | 75857     | 59973      |
| pERK       | 75989     | 43810      | 60401     | 11723      |
| pMEK       | 79357     | 67006      | 149779    | 137147     |
| MEK        | 74004     | 52150      | 93797     | 64529      |
| GAPDH      | 137307    | 134766     | 121209    | 122094     |
| MMP9/GAPDH | 0.6280525 | 0.34588843 | 0.6098475 | 0.439907   |
| Ratio1     | 1         | 0.55073174 | 1         | 0.721339   |
| MMP2/GAPDH | 0.4873022 | 0.43339566 | 0.6258364 | 0.491203   |
| Ratio2     | 1         | 0.88937765 | 1         | 0.784875   |
| pERK/GAPDH | 0.5534241 | 0.32508199 | 0.4983211 | 0.096016   |
| Ratio3     | 1         | 0.58740125 | 1         | 0.192679   |
| pMEK/GAPDH | 0.5779531 | 0.49720256 | 1.2357086 | 1.12329    |
| Ratio4     | 1         | 0.86028191 | 1         | 0.909025   |
| MEK/GAPDH  | 0.5389674 | 0.38696704 | 0.7738452 | 0.528519   |
| Ratio5     | 1         | 0.71797853 | 1         | 0.682978   |

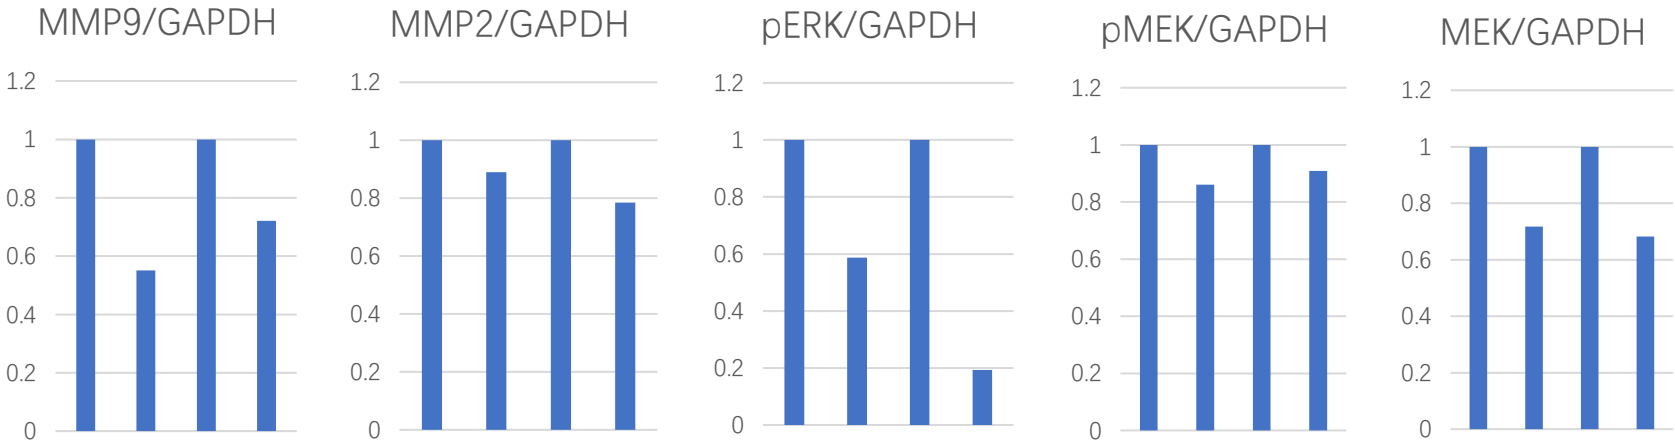

Fig. 5E-HCT116

|                  |  | pcDNA3.1+ | pORF-FLAG | pORFmut-FLAG | pcDNA3.1+ | pORF-FLAG | pORFmut-FLAG |
|------------------|--|-----------|-----------|--------------|-----------|-----------|--------------|
| DMSO             |  | +         | +         | +            | -         | -         | -            |
| U0126-EtOH(1 μM) |  | -         | -         | -            | +         | +         | +            |

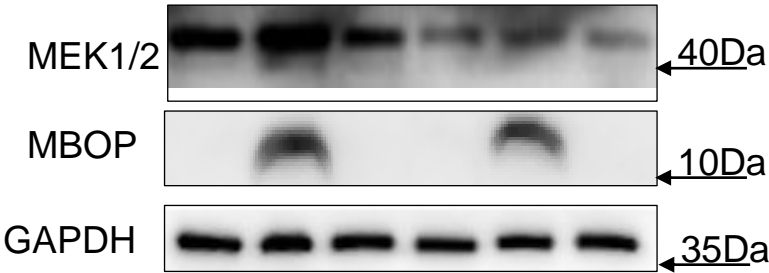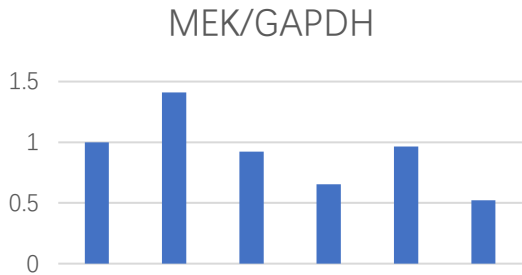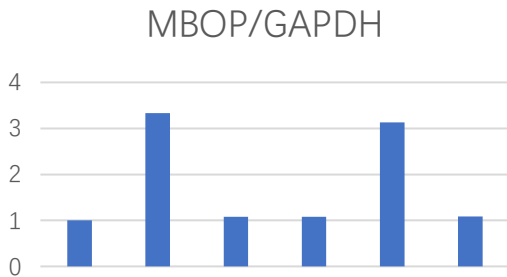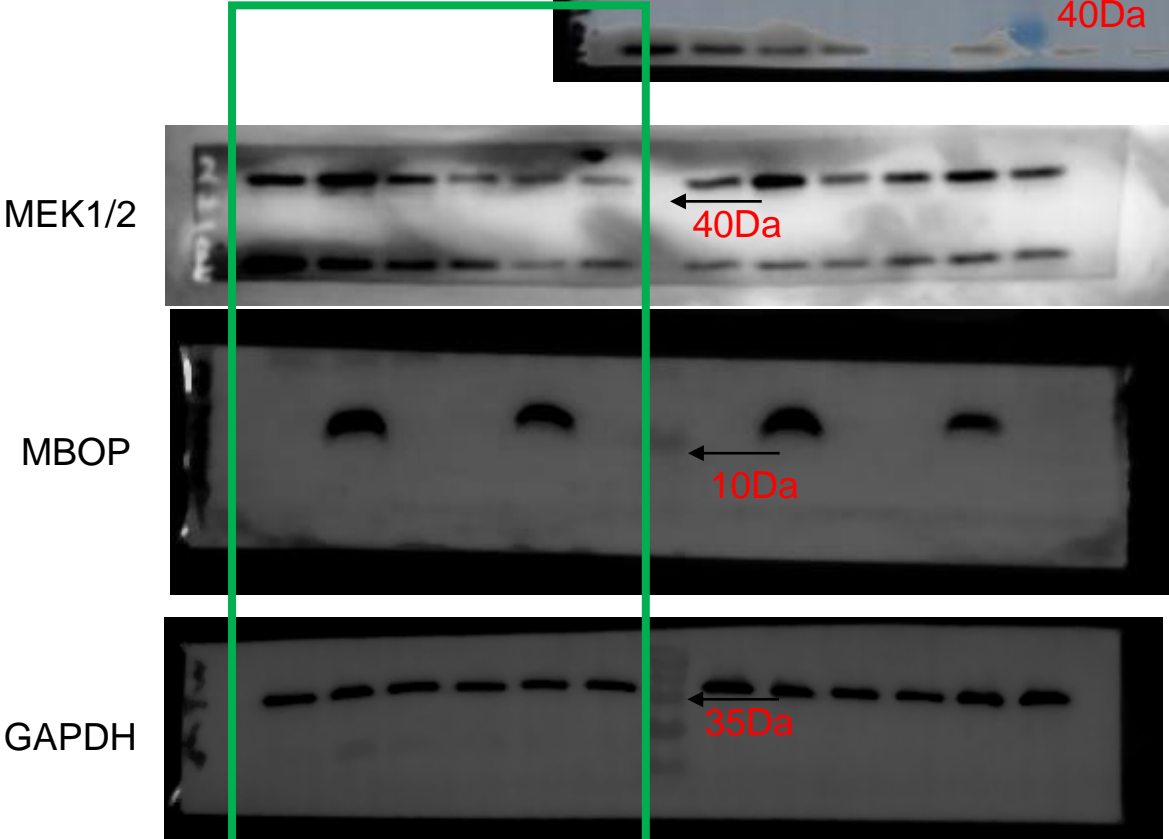

ImageJ straightened the GAPDH band

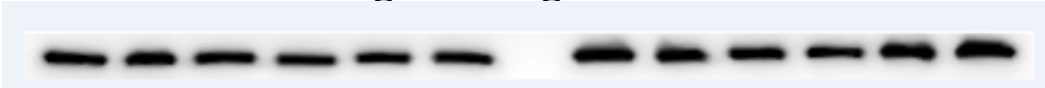

|            | pcDNA3.1+ | pORF-FLAG  | pORFmut-FL | pcDNA3.1  | pORF-FLA  | pORFmut-FLAG |
|------------|-----------|------------|------------|-----------|-----------|--------------|
|            | DMSO      | DMSO       | DMSO       | U0126-EtC | U0126-EtC | U0126-EtOH   |
| MEK1/2     | 41706     | 50896      | 33290      | 22815     | 32337     | 18957        |
| MBOP       | 27935     | 80604      | 26030      | 29024     | 71918     | 26550        |
| GAPDH      | 45570     | 39456      | 39387      | 38209     | 36624     | 39729        |
| MEK/GAPDH  | 0.9152074 | 1.28994323 | 0.8452027  | 0.597111  | 0.882946  | 0.477158     |
| Ratio1     | 1         | 1.40945458 | 0.9235095  | 0.652432  | 0.964749  | 0.521366     |
| MBOP/GAPDH | 0.6130129 | 2.04288321 | 0.660878   | 0.759612  | 1.963685  | 0.668278     |
| Ratio2     | 1         | 3.33252865 | 1.0780816  | 1         | 2.585117  | 0.879762     |

Fig. S4B-HCT15

|                  | pcDNA3.1+ | pORF-FLAG | pORFmut-FLAG | pcDNA3.1+ | pORF-FLAG | pORFmut-FLAG |
|------------------|-----------|-----------|--------------|-----------|-----------|--------------|
| DMSO             | +         | +         | +            | -         | -         | -            |
| U0126-EtOH(1 μM) | -         | -         | -            | +         | +         | +            |

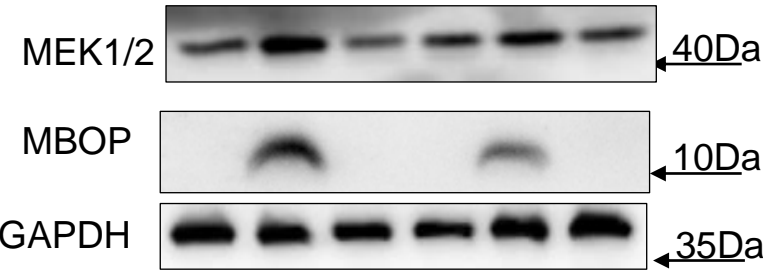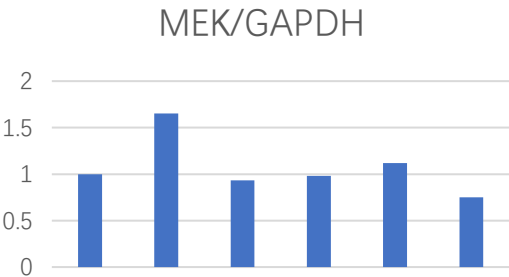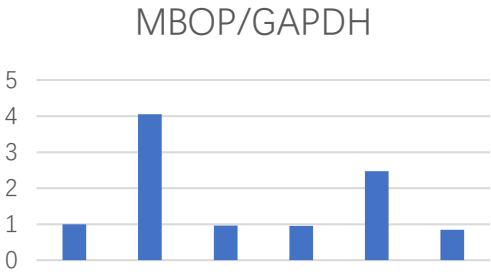

MEK1/2

MBOP

GAPDH

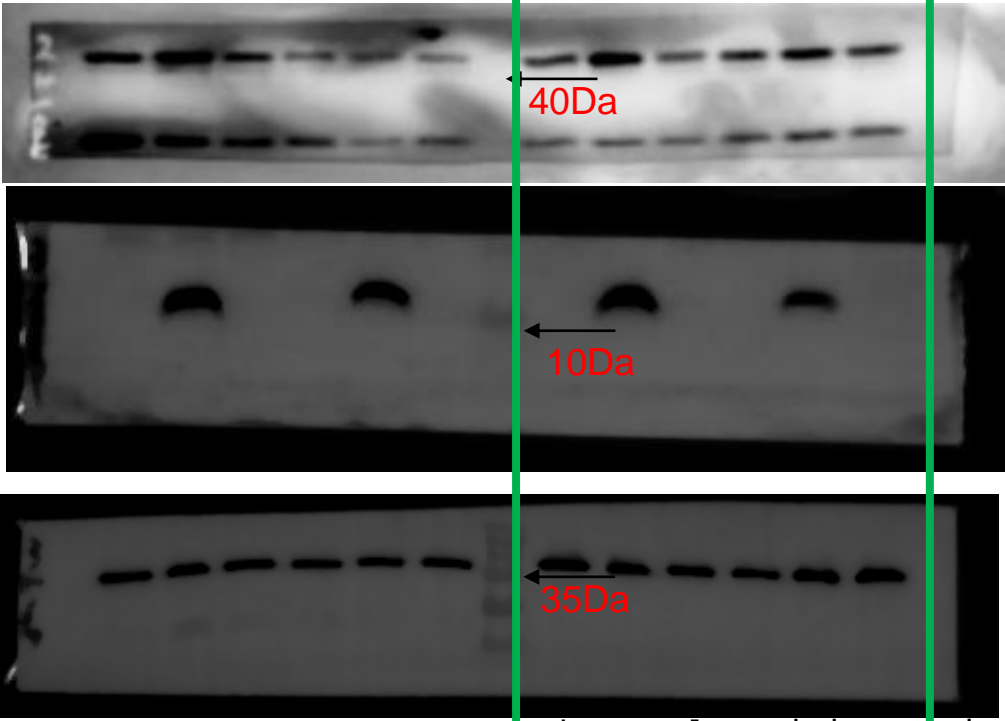

ImageJ straightened the right band

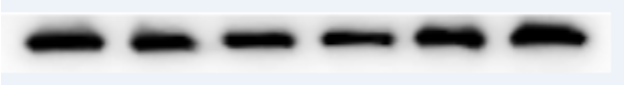

|            | pcDNA3.1+<br>DMSO | pORF-FLAG<br>DMSO | pORFmut-FL<br>DMSO | pcDNA3.1+<br>U0126-EtOH | pORF-FLA<br>U0126-EtOH | pORFmut-FLAG<br>U0126-EtOH |
|------------|-------------------|-------------------|--------------------|-------------------------|------------------------|----------------------------|
| MEK1/2     | 59893             | 81671             | 50249              | 45836                   | 60613                  | 45378                      |
| MBOP       | 23284             | 77923             | 20102              | 17296                   | 51925                  | 19913                      |
| GAPDH      | 53075             | 43787             | 47618              | 41365                   | 47920                  | 53465                      |
| MEK/GAPDH  | 1.1284597         | 1.8651883         | 1.0552522          | 1.108087                | 1.264879               | 0.848742                   |
| Ratio1     | 1                 | 1.65286209        | 0.9351262          | 0.981946                | 1.12089                | 0.752124                   |
| MBOP/GAPDH | 0.4387            | 1.77959212        | 0.4221513          | 0.418131                | 1.083577               | 0.372449                   |
| Ratio2     | 1                 | 4.05651312        | 0.9622779          | 0.953114                | 2.469972               | 0.848984                   |



Fig. S4D

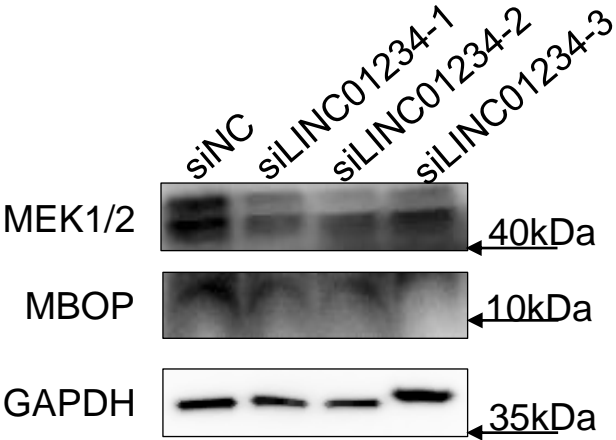

|            | siNC      | siLINC01234-1 | siLINC01234-2 | siLINC01234-3 |
|------------|-----------|---------------|---------------|---------------|
| MEK1/2     | 63203     | 31386         | 34907         | 46555         |
| MBOP       | 148609    | 113823        | 98009         | 86266         |
| GAPDH      | 45307     | 39118         | 35208         | 51327         |
| MEK/GAPDH  | 1.3949942 | 0.80234163    | 0.9914508     | 0.907027      |
| RATIO1     | 1         | 0.5751577     | 0.7107204     | 0.650202      |
| MBOP/GAPDH | 3.280045  | 2.90973465    | 2.7837139     | 1.680714      |
| RATIO2     | 1         | 0.88710204    | 0.8486816     | 0.512406      |

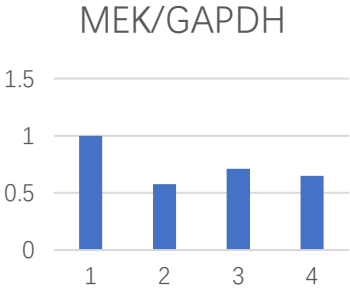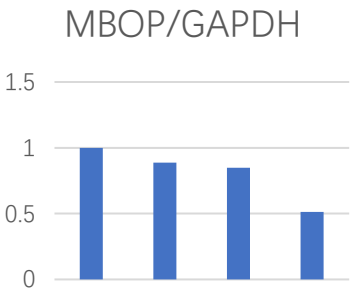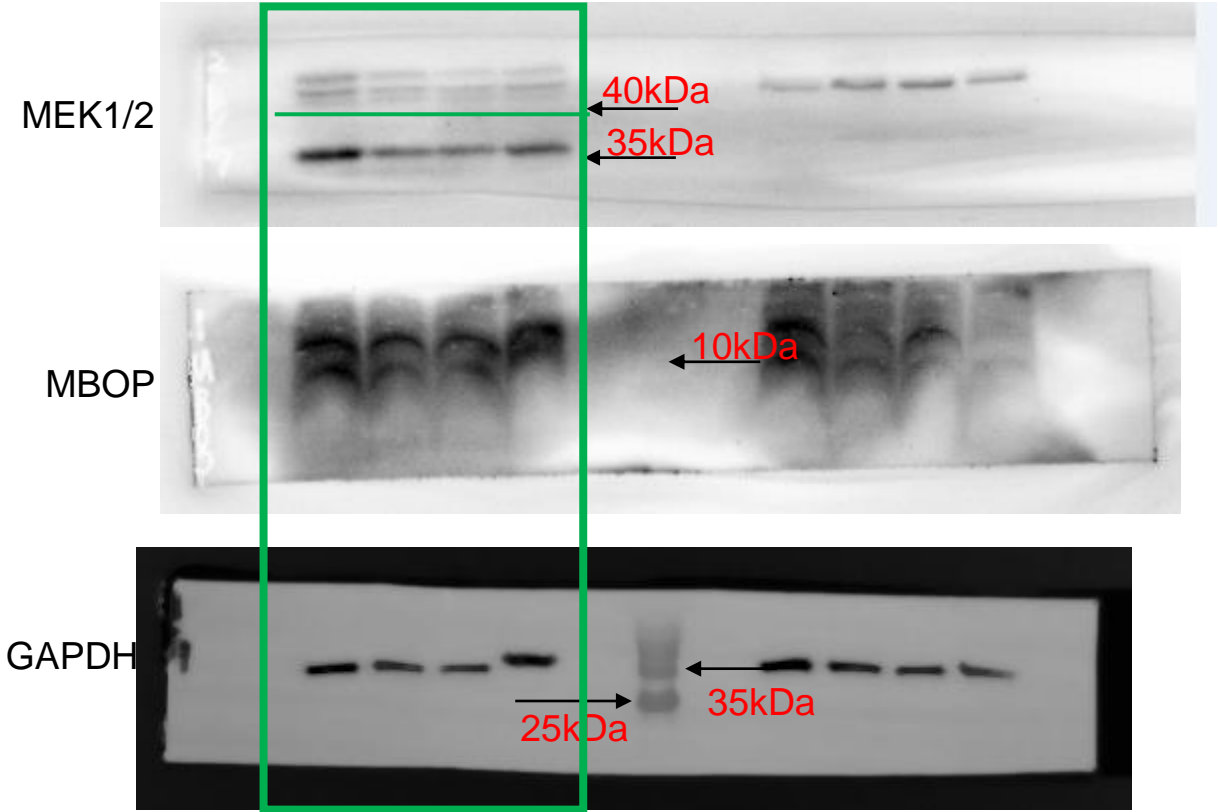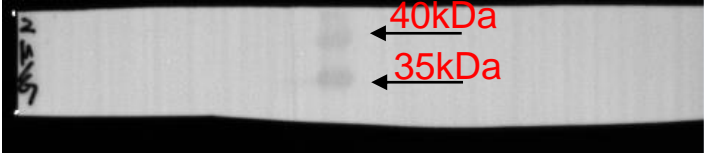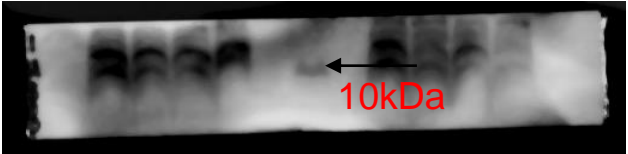

Fig. S4E

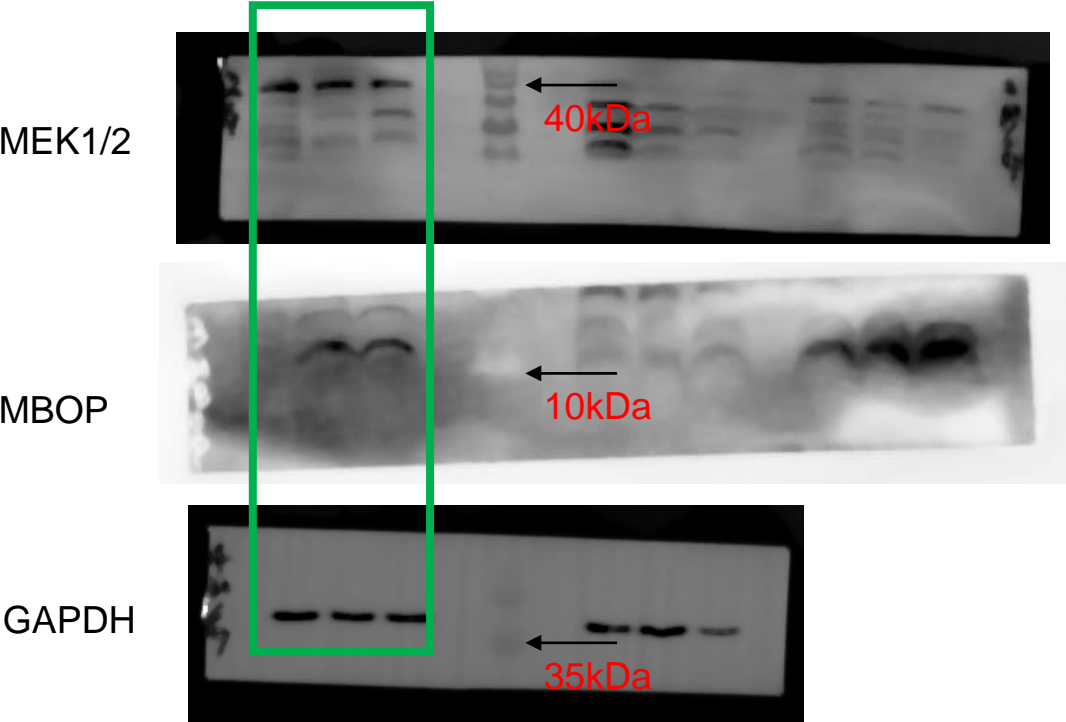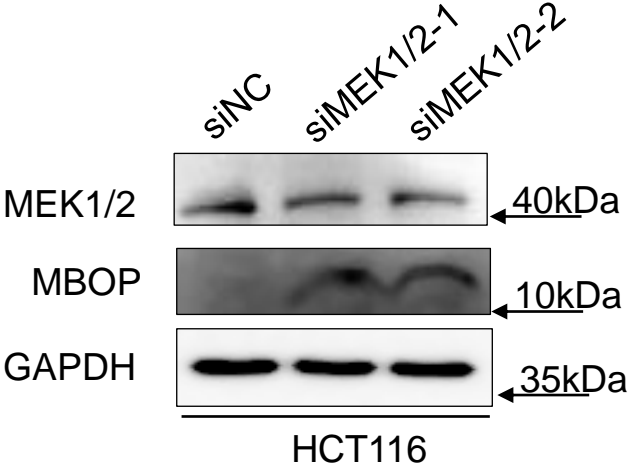

MEK/GAPDH

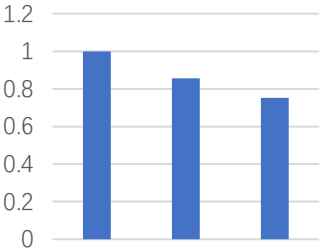

MBOP/GAPDH

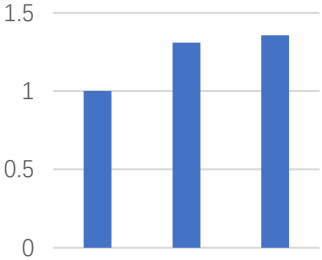

|            | siNC      | siMAP2K1-1 | siMAP2K1-1 |
|------------|-----------|------------|------------|
| MEK1/2     | 24458     | 19550      | 17016      |
| MBOP       | 112174    | 137094     | 140588     |
| GAPDH      | 29980     | 27962      | 27689      |
| MEK/GAPDH  | 0.8158105 | 0.69916315 | 0.6145401  |
| RATIO1     | 1         | 0.85701657 | 0.7532877  |
| MBOP/GAPDH | 3.7416278 | 4.90286818 | 5.0773954  |
| RATIO2     | 1         | 1.31035702 | 1.3570017  |



Fig. S4E

|            | pcDNA3.1+ | pMEK-HA    |
|------------|-----------|------------|
| MEK1/2     | 26006.000 | 55712.000  |
| MBOP       | 231200    | 186415     |
| GAPDH      | 19346.000 | 19169.000  |
| MEK/GAPDH  | 1.3442572 | 2.90635923 |
| RATIO1     | 1         | 2.16205589 |
| MBOP/GAPDH | 11.950791 | 9.72481611 |
| RATIO2     | 1         | 0.81373829 |

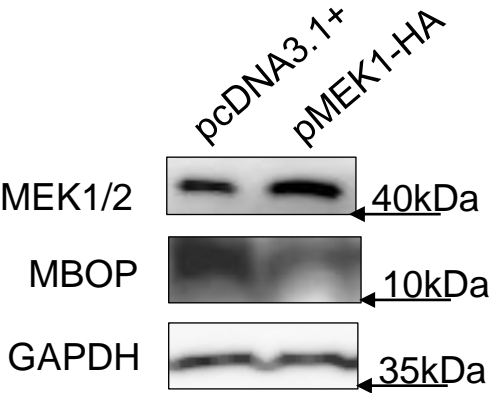

MEK/GAPDH

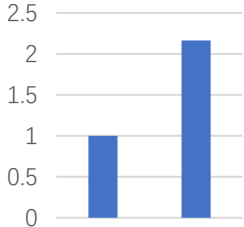

MBOP/GAPDH

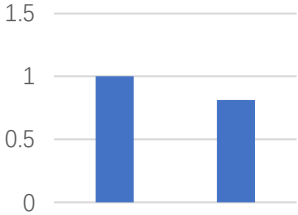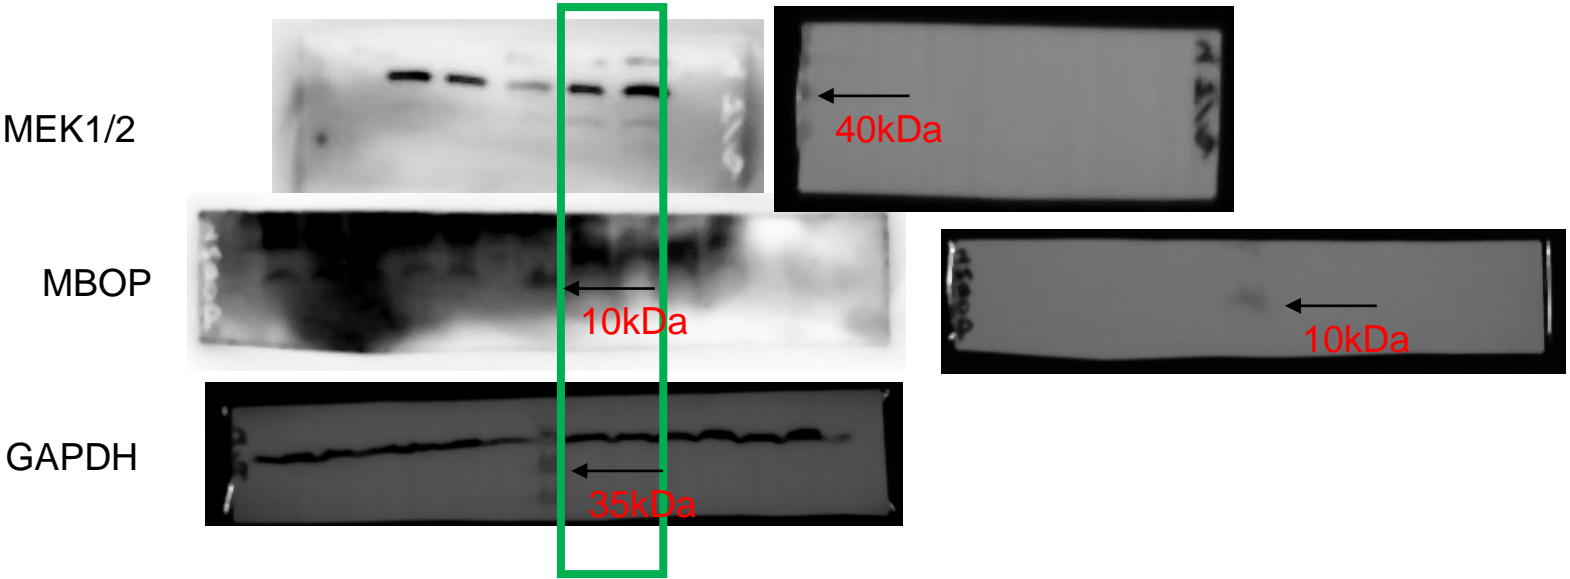

Fig. 6A

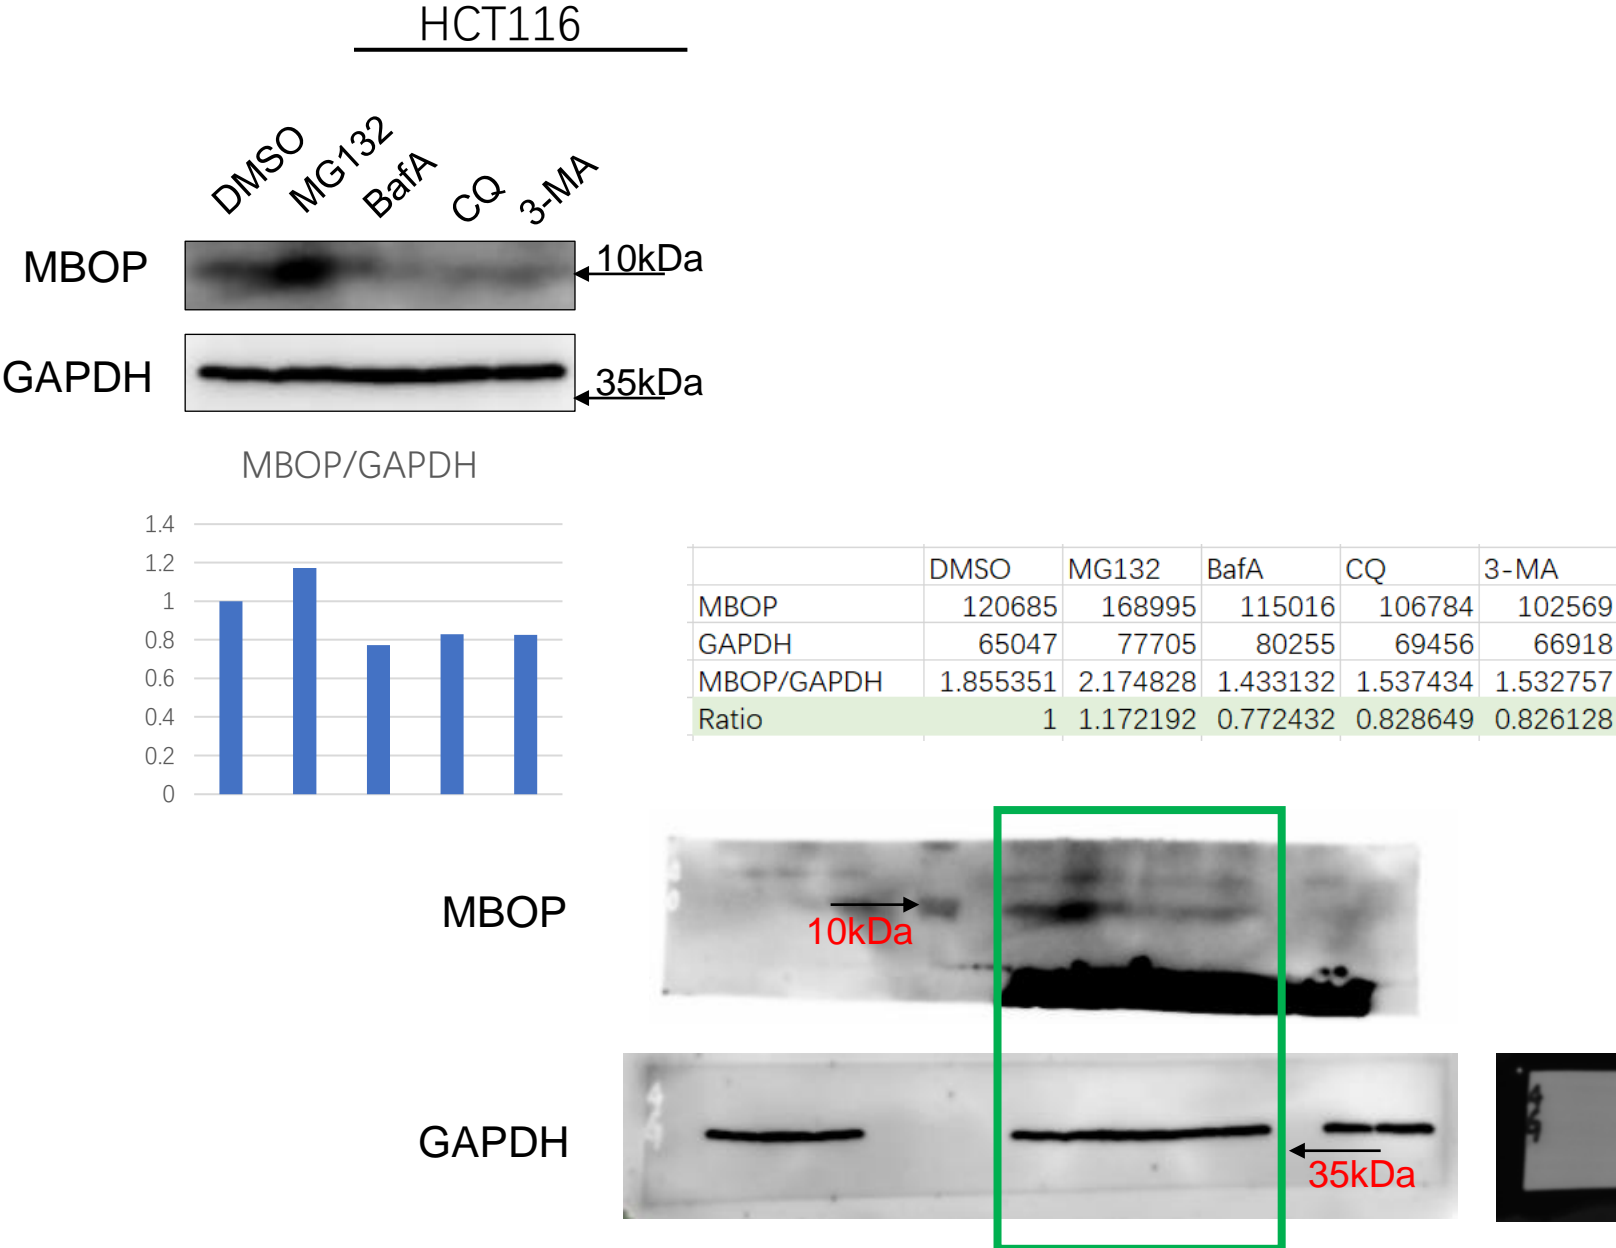

Fig. 6B

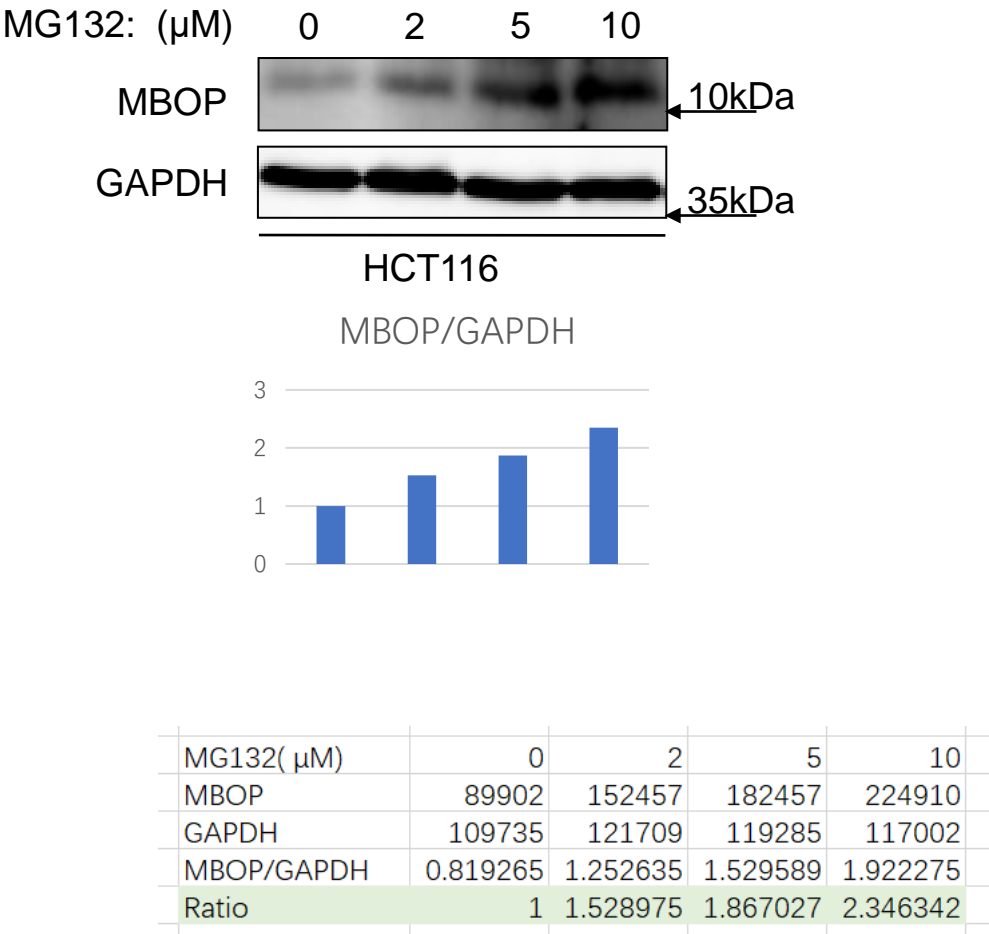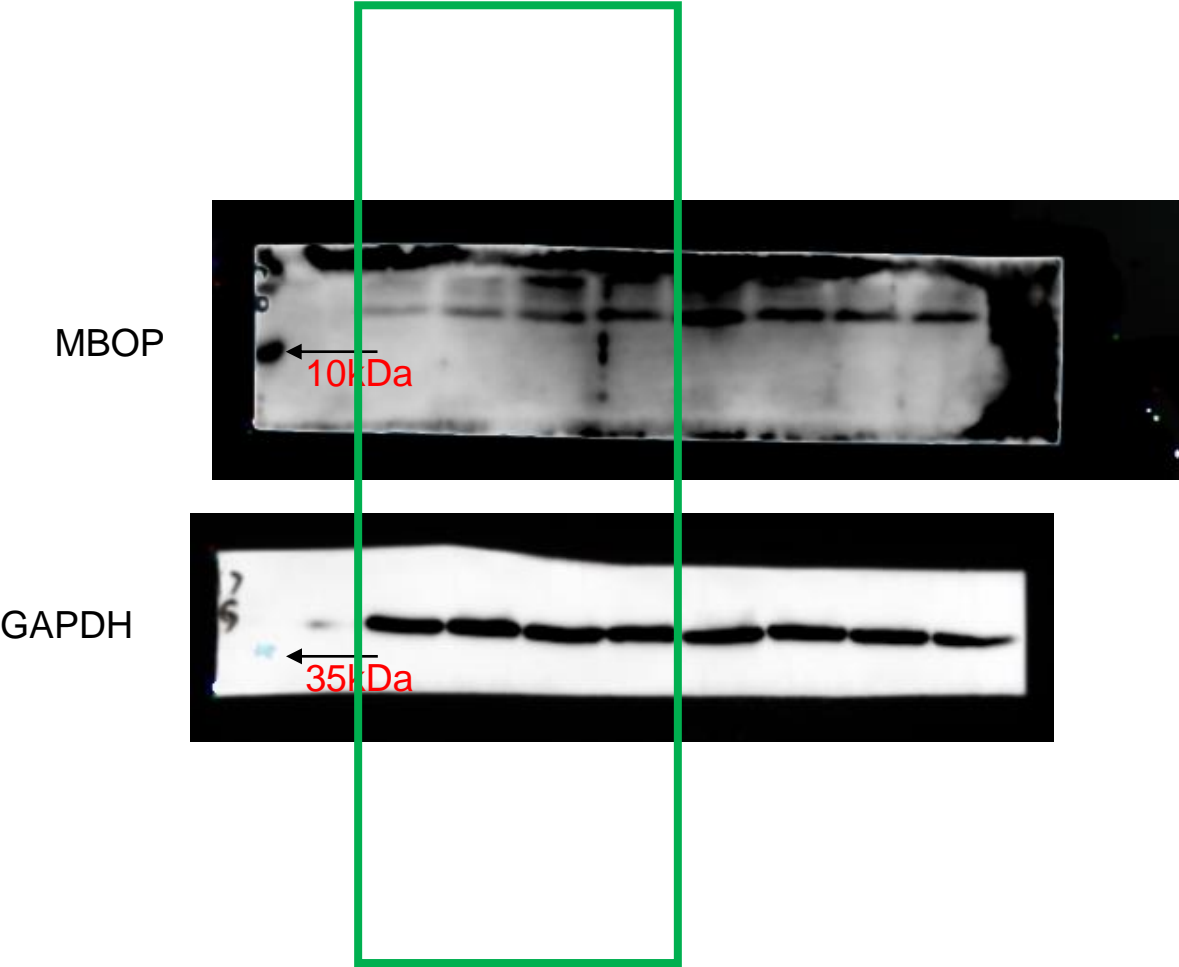

Fig. 6C right panel

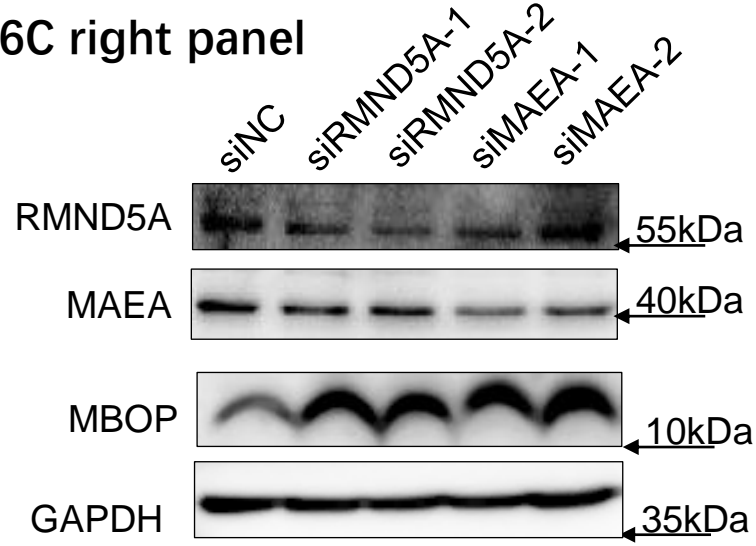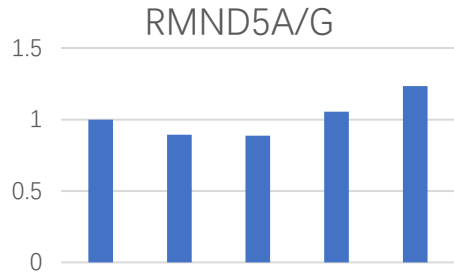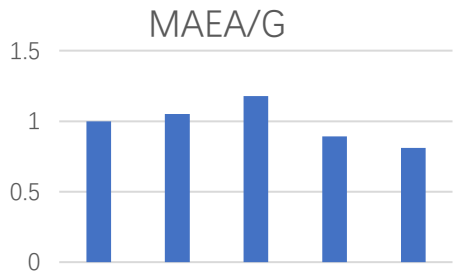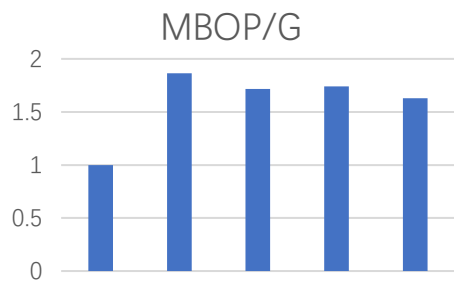

|              | siNC     | siRMND5A | siRMND5A | siMAEA-1 | siMAEA-2 |
|--------------|----------|----------|----------|----------|----------|
| RMND5A       | 296504   | 240512   | 234891   | 283844   | 380625   |
| MAEA         | 665691   | 635141   | 700666   | 538524   | 560997   |
| MBOP         | 85921    | 145151   | 131736   | 135478   | 145663   |
| GAPDH        | 63803    | 57864    | 57040    | 57845    | 66350    |
| RMND5A/GAPDH | 4.64718  | 4.156505 | 4.118005 | 4.906976 | 5.736624 |
| RATIO1       | 1        | 0.894415 | 0.88613  | 1.055904 | 1.234431 |
| MAEA/GAPDH   | 10.43354 | 10.97644 | 12.28377 | 9.309776 | 8.455117 |
| RATIO2       | 1        | 1.052035 | 1.177335 | 0.892293 | 0.810379 |
| MBOP/GAPDH   | 1.346661 | 2.508485 | 2.309537 | 2.342087 | 2.195373 |
| RATIO3       | 1        | 1.862745 | 1.71501  | 1.739181 | 1.630235 |

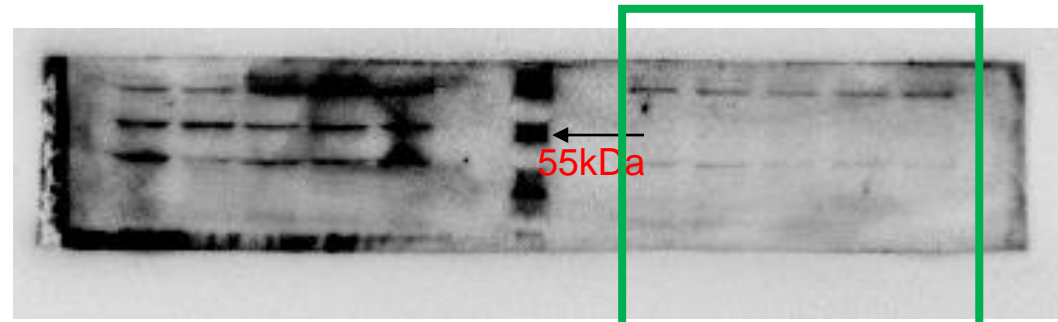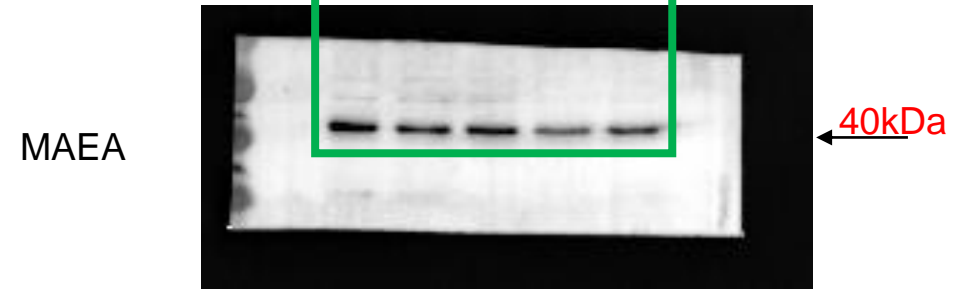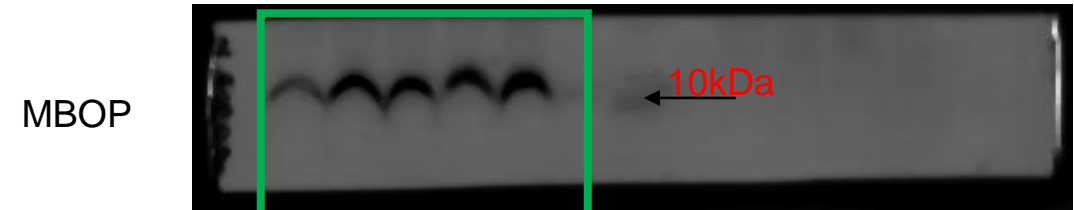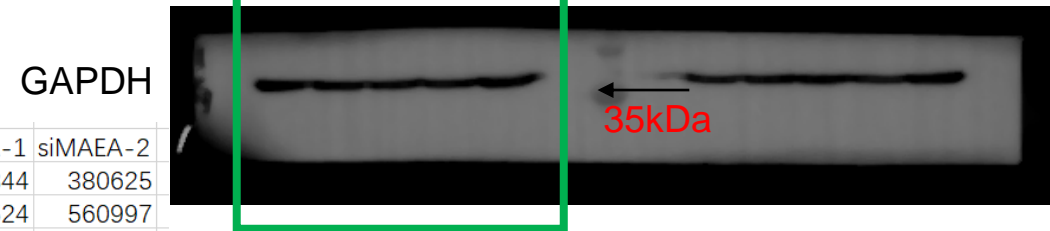

Fig. 6D

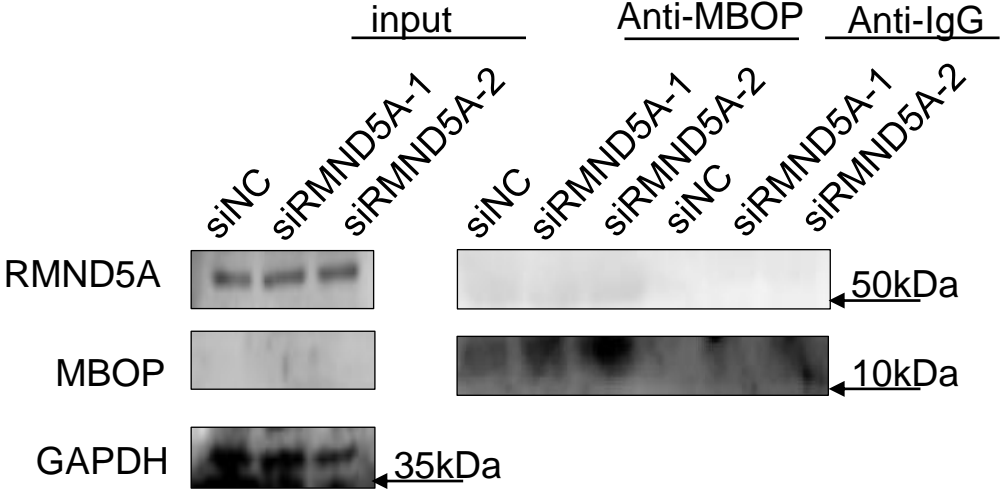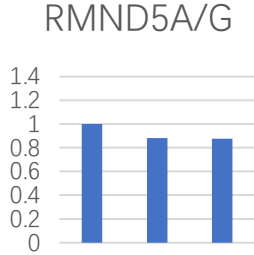

|          | siNC     | siRMND5A | siRMND5A-2 |
|----------|----------|----------|------------|
| RMND5A   | 47082    | 42810    | 39585      |
| GAPDH    | 119894   | 123790   | 115203     |
| RMND5A/G | 0.392697 | 0.345828 | 0.343611   |
| RATIO    | 1        | 0.880648 | 0.875003   |

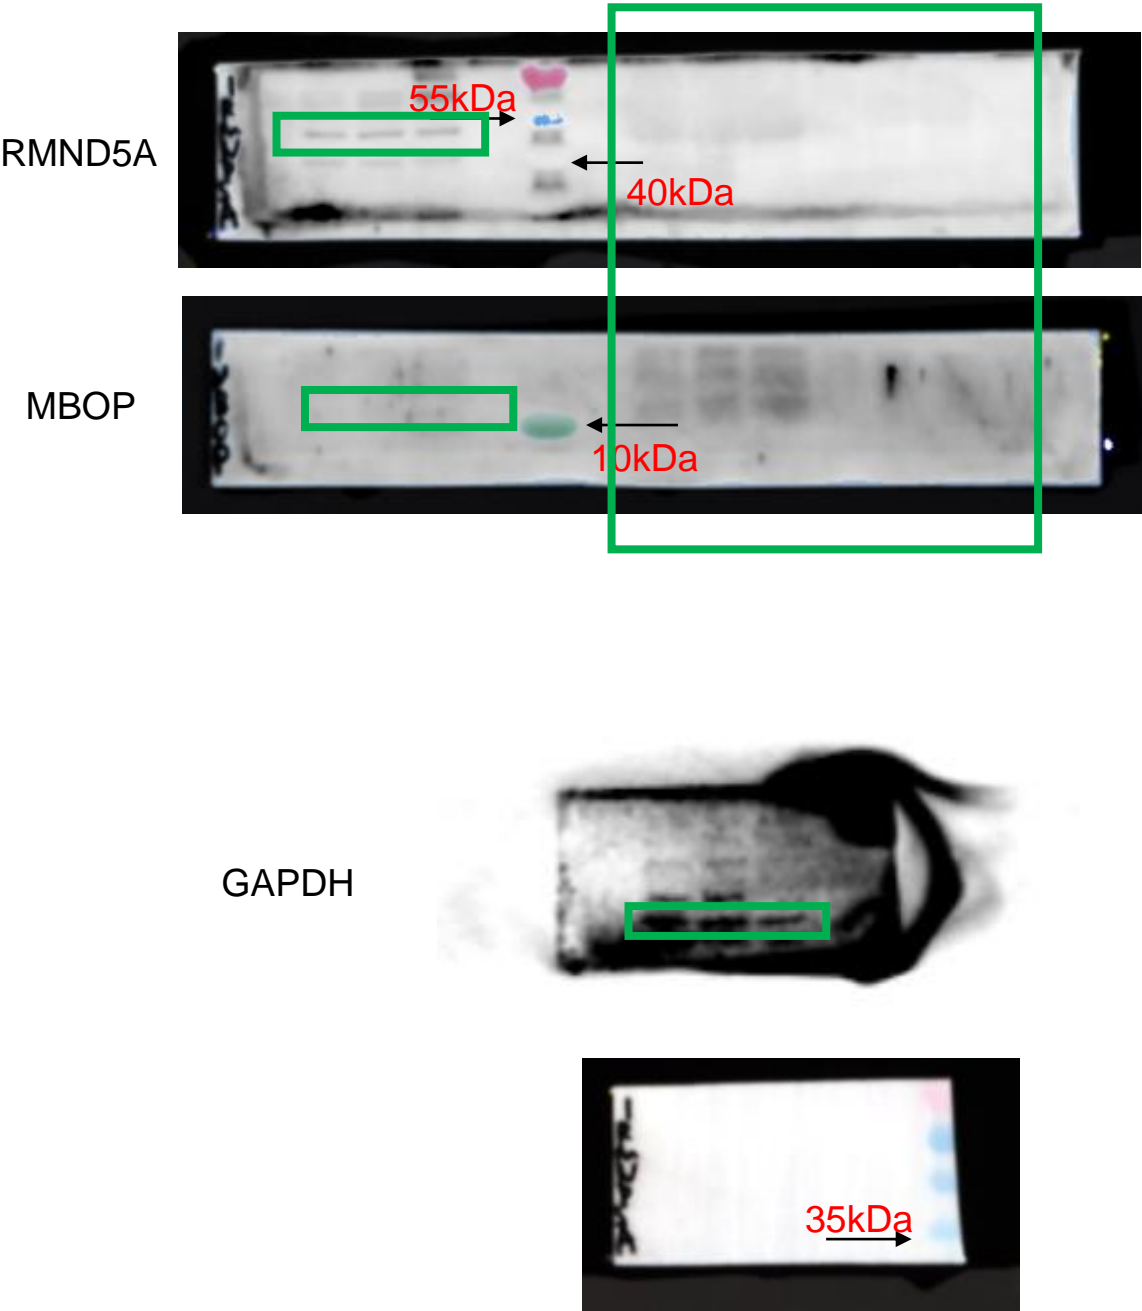

Fig. 6D

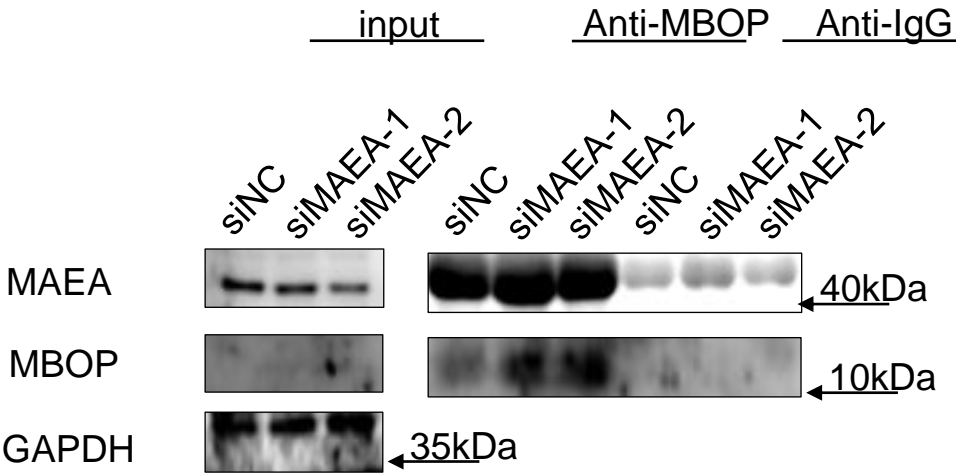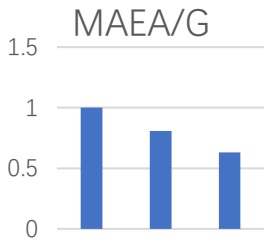

|        | siNC     | siMAEA-1 | siMAEA-2 |
|--------|----------|----------|----------|
| MAEA   | 81853    | 61301    | 49913    |
| GAPDH  | 164566   | 152450   | 159223   |
| MAEA/G | 0.497387 | 0.402106 | 0.313479 |
| RATIO  | 1        | 0.808436 | 0.630251 |

GAPDH

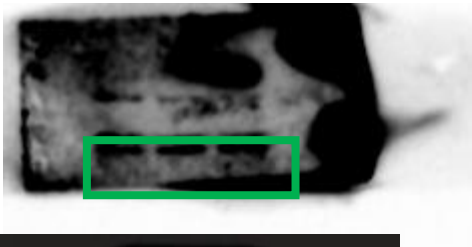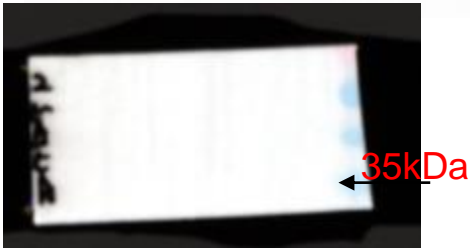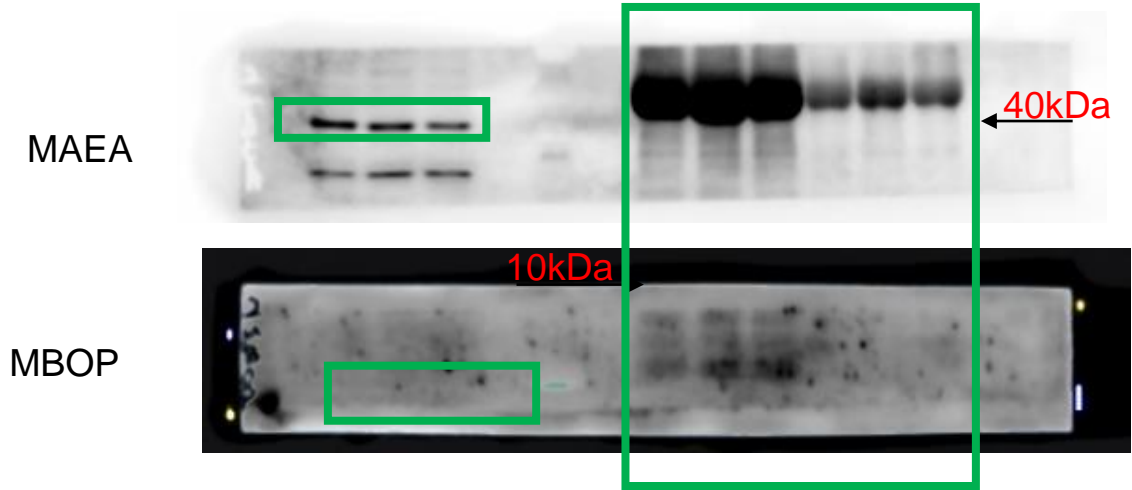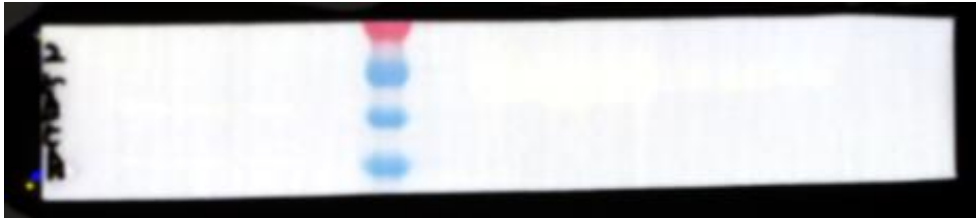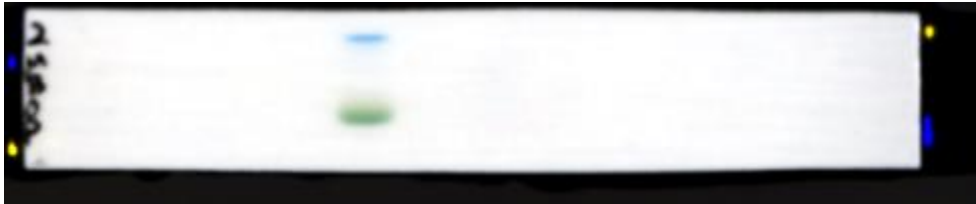

Supplement: s1 [file s1]
