# Supplementary material for: Oncopeptide MBOP Encoded by LINC01234 Promotes Colorectal Cancer through MAPK Signaling Pathway
Source: MDPI journal article supplement (doi:10.3390/cancers14092338), 2022-05-09
Supplement: s1 [file s1]

Supplementary Figures

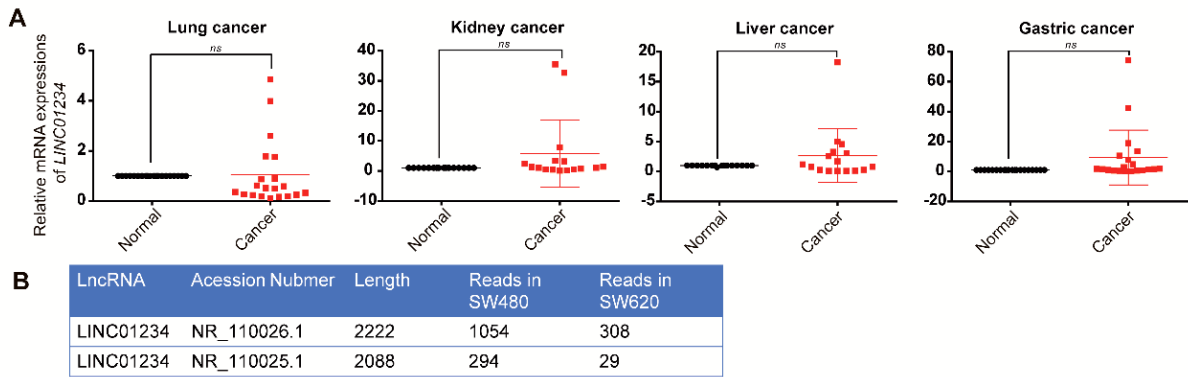

**Figure S1. *LINC01234* has ribosome binding sites across several perspectives (A).** Expression of *LINC01234* in lung cancer ( $n=20$ ), kidney cancer ( $n=16$ ), liver cancer ( $n=16$ ) and gastric cancer tissues ( $n=20$ ), and data are represented as mean  $\pm$  SD. **(B).** GSE139407 showed ribosome reads of *LINC01234* in colorectal cancer (CRC) cell lines SW480 and SW620.

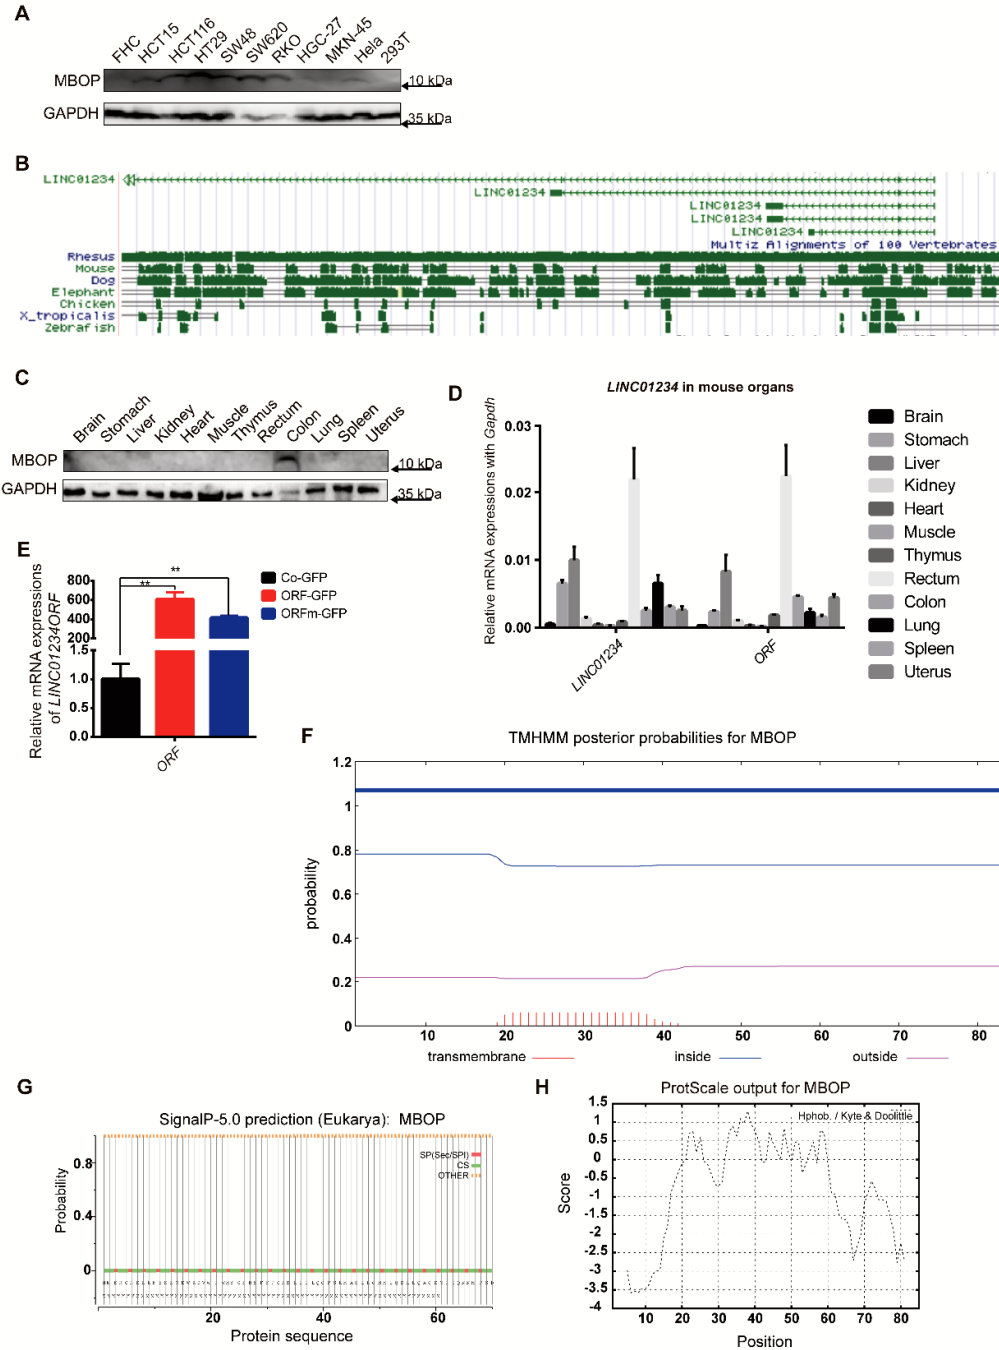

**Figure S2. *LINC01234* encodes an endogenous peptide highly expressed in CRC (A).** The expression of MBOP in various cell lines, including normal colonic epithelial cell line FHC, CRC cell lines HCT15, HCT116, HT29, SW48, SW620 and RKO, gastric cancer cell lines HGC-27 and MKN-45, cervical cancer cell line HeLa, and embryonic kidney cell 293T. CRC cell lines showed higher expression of MBOP compared with other kinds of cell lines. (B). The conservation situation of *LINC01234ORF* in UCSC browser, and only rhesus monkeys shared similar sequence coverage with humans. (C). MBOP expressions in organs of a female BALB/c nude mouse, the colon showed a positive signal. (D). The mRNA expression of *LINC01234* and *LINC01234ORF* in organs of a female BALB/c nude mouse, data are represented as mean  $\pm$  SD. (E). The expression situations of *LINC01234ORF* in lentiviral transfected cell lines HT29, data are represented as mean  $\pm$  SD,  $**p < 0.005$ . (F). Transmembrane

Hidden Markov Model server 2.0, (G). SignalP-5.0 server and (H). ProtScale all figured out there was no transmembrane region in MBOP.

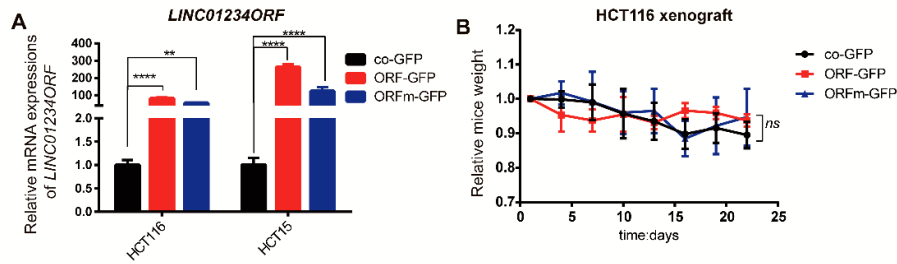

**Figure S3. MBOP promotes CRC progression through cell migration and proliferation (A).** The expression situations of *LINC01234ORF* in lentiviral transfected cell lines HCT116 and HCT15, data are represented as mean  $\pm$  SD, \*\* $p < 0.005$ , \*\*\*\* $p < 0.0001$ . (B). The relative mice weight of three groups, mice weight tended to decrease in all three groups, but no remarkable difference was observed.

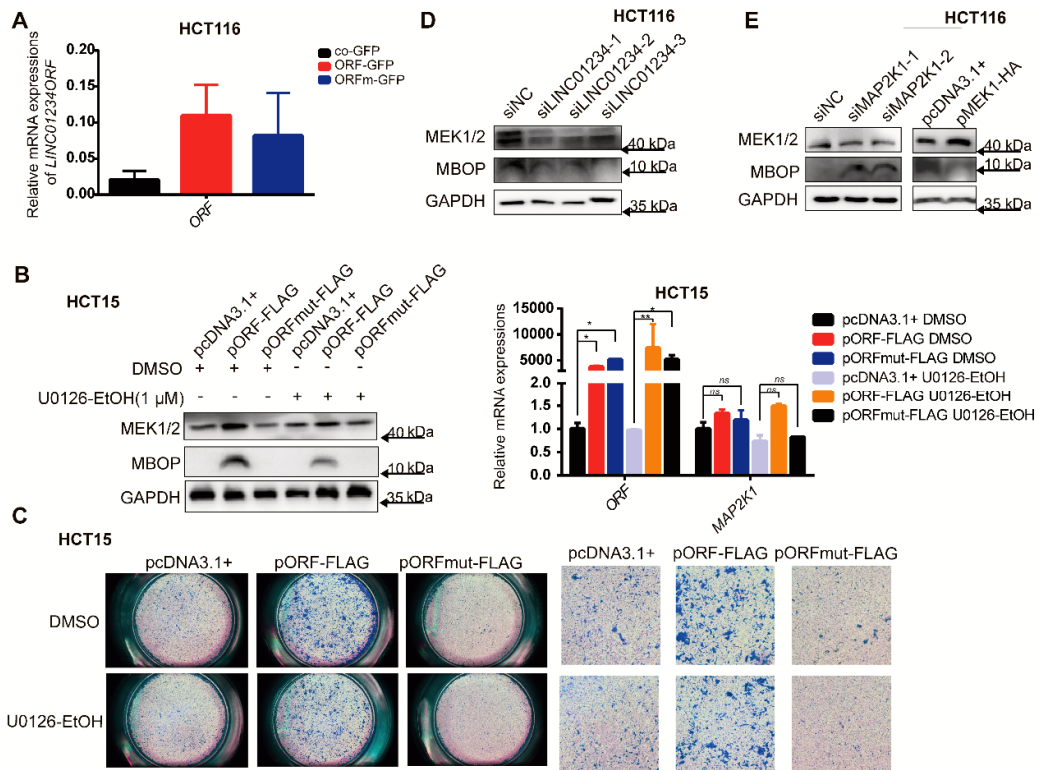

**Figure S4. The MBOP/MEK1/pERK/MMP2/MMP9 axis in CRC (A)** The relative expression of *LINC01234ORF* in tumors burdened by mice, which was represented as mean  $\pm$  SD. (B). HCT15 cells were transfected with plasmids pcDNA3.1+, pORF-FLAG, and pORFmut-FLAG, followed by treatments of DMSO and U0126-EtOH. The overexpression of MEK1 and MBOP brought by U0126-EtOH, whereas the *MAP2K1* showed no significant alterations. Data are represented as mean  $\pm$  SD, \* $p < 0.05$ , \*\* $p < 0.005$ . (C) The pro-migration effect driven by the transfection of pORF-FLAG could be partially reversed by U0126-EtOH.

(D). Knockdown of MBOP through siRNAs targeting *LINC01234* decreased the protein expression of MEK1. Note: Same siRNA-treated HCT116 samples from Fig. S4D were used to detect the expression of MBOP in Figure 2C. (E). Knockdown of MEK1 with siMAP2K1 increased the expression of MBOP while overexpression of MEK1 decreased the expression of MBOP.
