# Supplementary material for: Oncopeptide MBOP Encoded by LINC01234 Promotes Colorectal Cancer through MAPK Signaling Pathway
Source: Cancers (Basel). 2022 May 9;14(9):2338. doi: 10.3390/cancers14092338 (PMC9100262; doi:10.3390/cancers14092338)
Supplement: Supplementary file 1 [file cancers-14-02338-s001.zip]

Archive with 8 entries (8 files):
- File S1 Supplementary western blot results.pdf
- Supplementary figures-MBOP.pdf
- Table S1 ORF prediction in lncRNAs.xlsx
- Table S2 Verification of LINC01234ORF.xlsx
- Table S3 Mass spectrometry of CRC tissue 21.xlsx
- Table S4 266 Candidate interacting proteins.xlsx
- Table S5 Paired cancer tissue sapmles from patients.xlsx
- Table S6 Primers and siRNA used in this research.xlsx
