# Supplementary material for: Oncopeptide MBOP Encoded by LINC01234 Promotes Colorectal Cancer through MAPK Signaling Pathway
Source: Cancers (Basel). 2022 May 9;14(9):2338. doi: 10.3390/cancers14092338 (PMC9100262; doi:10.3390/cancers14092338)
Supplement: Supplementary file 1 [file cancers-14-02338-s001.zip › Table S1 ORF prediction in lncRNAs.xlsx]

## Sheet: Sheet1
No.	lncRNA	ORF
1	BCAR4/tv1	atgtaccaacctatccaaacttatccatggatgaatctatccagaagacg ggagttccgatgcttgtcttgctctgaatgtctgcttgtcacctgcttag ggttatcgactgtgattctgggactcattgttgttctacaggacccctct gactctgtggttttctctactggattaacaatgatagccataggtgcttt ttttgttgtcctcactggagtgacagccctgtgtacggttacagtcgacg agaacttgcagaaaaccacgaggctaagactaggagtgatacgaaaaagc ggaagtctccaaggaactacagagccttccatgactcactcaataatcgc tagcacctcgctgtag
2	CDKN2B-AS1/tv7	atgttggccagactggtcttgaactctcgacctcgtgattcgcccgcctc ggcctcccaaagtgctgggattacaggtgtgagacaccacacccggcgga tagagagaattttgacagtatcttacagacagcaagttgaacattgtggg atgcatgagctattgaggcctttgcagctttctgctacatggaggctagg gccagagtcaagatttatgctttgcagcacactggtcagctgtttttgca aatcagattaa
3	GAS5/tv9	atgacttgcttgggtaaggacatgaagacagttcctgtcataccttttaa agggtttttaatgaccacaacaagcaagcatgcagcttactgcttgaaag ggtcttgcctcacccaagctagagtgcagtggcctttgaagcttactaca gcctcaaacttctgggctcaagtgatcctcagcctcccagtggtctttgt agactgcctgatggagtctcatggcacaagaagattaaaacagtgtctcc aattttaa
4	GAS5/tv14	atgattgaagaaatgcagacctgttatcctaaactagggtttttaatgac cacaacaagcaagcatgcagcttactgcttgaaagggtcttgcctcaccc aagctagagtgcagtggcctttgaagcttactacagcctcaaacttctgg gctcaagtgatcctcagcctcccagtggtctttgtagactgcctgatgga gtctcatggcacaagaagattaaaacagtgtctccaattttaa
5	HOTAIR/tv1	atgaggaaaagggaaaatctagggaacgggagtacagagagaataatccg ggtcctagctcgccacatgaacgcccagagaacgctggaaaaacctgagc gggtgccggggcagcacccggctcgggtcagccactgccccacaccgggc ccaccaagccccgcccctcgcggccaccggggcttccttgctcttcttat catctccatctttatgatgaggcttgttaacaagaccagagagctggcca agcacctctatctcagccgcgcccgctcagccgagcagcggtcggtgggg ggactgggaggcgctaattaa
6	HOTAIR/tv2	atgaggaaaagggaaaatctagggaacgggagtacagagagaataatccg ggtcctagctcgccacatgaacgcccagagaacgctggaaaaacctgagc gggtgccggggcagcacccggctcgggtcagccactgccccacaccgggc ccaccaagccccgcccctcgcggccaccggggcttccttgctcttcttat catctccatctttatgatgaggcttgttaacaagaccagagagctggcca agcacctctatctcagccgcgcccgctcagccgagcagcggtcggtgggg ggactgggaggcgctaattaa
7	MEG3/tv1	atggaagctgcggaagaggccctgatggggcccaccatcccggacccaag tcttcttcctggcgggcctctcgtctccttcctggtttgggcggaagcca tcacctggatgcctacgtgggaagggacctcgaatgtgggaccccagccc ctctccagctcgaaatccctccacagccacggggacaccctgcacctatt cccacgggacaggctggacccagagactctggacccggggcctccccttg agtag
8	MIR31HG	atgactggtctacgtgggggtgtgaagtccccttactccacctgtgaaga gtcttcccagtttcagaccaccctcccagcctcctgttattggctaaggc cattttgtgactacactgcaggtagagatggattcctggaaatacctcct caaggccagtgtagagccctcaatcacccactgcccccagcttctccttc tcccatctcctgcaccaagcaggtctccaggtgttccagctgctga
9	MIR2052HG	atgatccagagacaaaggtggcagctttggagcaagtggagagccagaaa aggatccagaactggagtggaagctgaagctatgccatcttttatgtctg atgaggcagtttcatctgatttgaagatgatgaagaaaagttctttgcaa ggttgcttattgaatattactgggaaaacaggaaaattaggaggaatgtt ctggagtgatttatctttttcatcaggggcccgcgttcagtccagccacc agatcaacacattctccaaactcattaactttggagaggctacccagagt tcctga
10	LINC00520	atgaatgagctttggcattggaaaaacctgggttcaaatcctggctactc tacttcctgtgtcagttgcttcacttttctaaatataaattgtgttcctt ctgttttggcttctaggaaaccccgagccaaacgtatggccacctctgac cactcgaccagcccagcatggtgtacatttctgggtagcttatcacgcct tccaagcattgcctttatcttccttctccccatcaagcctgtattgtttt ccttttga
11	CYTOR	atgactggatggtcgctgctttttaagtttcaaattgacattccagacaa gcggtgcctgagcccgtgcctgtcttcagatcttcacagcacagttcctg ggaaggtggagccaccagcctctccttgtcctggaggctggaagtgcaaa aggaaggtgtcggcaagatcgtttttttctgagagctctctccttggctt gcagatggcagcctgctcctggcacagtcttttctctactcatgcccaaa gttacggaggacccagcaaccatctcctgcagcccctggaaacctcttga
12	NEAT1	atggtgggtacaccggtagtgctcttttgttcttgcttcgtttttttaaa cttgaactttacttcgttagatttcataatactttcttggcattctagta agaggaccctgaggtgggagttgtgggggacggggagaaggggacagctt ggcaccggtcccgtgggcgttgcagtgtgggggatgggggtatgcagctt ggcactggtactgggagggatgagggtgaagaaggggagagggttggtta gagatacagtgtgggtggtgggggtggtaggaaatgcaggttga
13	LINC01089/tv4	atggaattaaatggccaaagcagtaaacagtcctcagcgaagccgccttt ttgcctacccaaccctggaaagtttgcagaagtggaaggagcagaacgtg agggtgtaacttacaaaaaggttctgggccggagaaggggcgacgttcgg gcaccccccgaatggacaatctttccttctgtcaacggcaggggcaggcc tagtttgactctgacagtcctcccactaaggaattcctggtga
14	LINC01089/tv5	atgcccagttcctcagtgggcccagcgcggcccagcctccgaggaagctc tgagcagctggcttggctccgaggtatttttagctacagatccagccccc ctccatcaccacaacagtcgagtccaaatcaaacgcgctccaggcaggtg gggctggggttctgccagcctcctggccagcaggggtgggtgggcagact ggggccagtatcagctgttctgcctggacccaggccgggctgggaaggca cacttgtgcttatttcccgcctccacttctgtgcaagcttgtgctgtcat aagcagagatcacagccccatttcttggatggagaaagtggacactga
15	LINC01234/tv1	atgaaagagagagggagagaaaggaaggaagagaaggagggagaatggaa ggatgtatggatttggatgtatgggttccattccttctaccctggcaaaa gcttactcatccttcagtgtccatccaaaatggcatctcttcttgggcac catctccagagtctcctgcaagcaggtagctacatcccacaaaacaacca cccatctgaccatgcaagtgtgtgggggaatgaagaccagcccaggaatc tgagatga
16	FGF14-AS2	atgggtaaagccaggaggaagcccgtgcctggcccgttgggctccctcct cctcagagccgaagcagtccacactcggaacccagcttcacccggattac cgaggggttccacgcctggaggcagagctgcagcgtgggcccgctcgcgg ctttgcagaaaacaaataatgacacacttctctggaagcccggggcctgg gcccagagccgtggcttctgccaaactttctggtcccggacaccaactcc ccgcctctcagcccgaggccacagcggcccagcaccctgcaccttttaaa gtggctccaaaaaggagaaagccaaatagatcagggtggtag
17	PTPRG-AS1/tv1	atgccatccatctgcagttgtgacaagcaaaaaagtctccagacatggcc aaatgtcccctggggggcaaaatcacccccaattgagaactactgctcta aactatggagtctcactctgtcacccaggatggagtacagtggcgtgatc tcggctcactgcaagctccgcctcctgggttcatgccattctcctgcctt agcctcccgagtagctgggactacaggcgcctgccaccacgcccggctaa tttttgtatttttagtagagacagggtttcaccgcattagccaggatggt ctcgatctcctgacctcgtga
18	PTPRG-AS1/tv2	atgatttcacttttgacagaagctgtccctcaaaagcaaacatgcaatag aagaaacagatctcaatggagtctcactctgtcacccaggatggagtaca gtggcgtgatctcggctcactgcaagctccgcctcctgggttcatgccat tctcctgccttagcctcccgagtagctgggactacaggcgcctgccacca cgcccggctaatttttgtatttttagtagagacagggtttcaccgcatta gccaggatggtctcgatctcctgacctcgtga
19	NBAT1	atgagaatgcacagcaagcggcagacaatcacccggcattcggcatctct ttcttttcacgcgctccctcgctccgcctttctccagctctgccttctca ggcagatacatcagataccttgtttatccatcttcagctccactctgagg gcgcagacgcacgattccgggatcgggtgcaccacggcgaagcccaggcg ggagacggcaggagcagctcagatgaagaaactgaaacccacagagatga agtaa
20	NKILA	atgctgccagagctctcccagaaagaccaggaggcttgttctggagaagt caagcccagggatgtggctcaggctggtccaagctctttggaggagtcca agcgtgcccagcccagagggaggttcagaggcactgaccgtcttctgttt gggaggagaagctcactcttggagccacagccagcactaggtcaggaccc aggccccggcccaggagtggggcaatacccagcgtctaccccagatggca ccctgctgtga
21	SPRY4-IT1	atgcccagtggagccatcggatgctgcatcgtccccagagagccaagtca tcgtgggccaagctcccatccccatgtctggcctcaactgcaggcccaga tgttgacagctgcctctggagggttatgggagcctgtgaatgccaacatc cccattgcctgcagcggctgctcccatcctggcttcctggtgggactttt ccatgaattggggaatctgctttctgattccaaggcctattaa
22	FOXCUT	atgctaaagcagctgtggacttgcagcctccctcctgtgtgtgcagagcc cccaggaatcactgccccagtgcagcaggagaagcgccttccctcatgcc ctaagcctgccttttctgttgtcccccagctcctgggccaggtggagccc cccctgaagctggtttctacctgccctcgcctccccactgcagcccacag ttcggctttcagggctgaacccagagcccagaggatggagaagccagaaa gcggggaggtaagggagagggcgtctaggcacaccacagaggtgattggg ctgtga
23	CCDC26/tv1	atggaaagattgtgcctgcagcctggcctgttgcccacagcggtctacct gccacactgggaaagatcgagcagagacagagaagaaaaggaggctccat ttttcaggctgctctcccgcaggctcatgttttgtgttcatgccaggcag agaacacaaaatgttccaataaataagtatcaaaggttagtggtgaaaat gaaggaggaggaggcattgcgtgaaaaactaaacatgcaaaatattacac acaaagagaaccaaaatgcaggttcactggaaatgatagacaatatgtta aaacaagaggagagaagagagctgaaataa
24	SNHG7/tv2	atgtgggcccagccctgtgccaggaggctggctggaataaaggtacagat agaggcctcaccccctctgggaccactggcactcagggtgtttgcagcct cagagcccacctgcccccagggccacagctgcatctcctgccctgctgtc attacagggatgggcaggctggcatgggggcagccgctgcccctgcctgg gtgttgctgtgtattcctgccggccaggggccactgccaggaccacgcct cccttttcatatcccgattcttaagttctgctattgtggtattctggtgg agaaaaaagaaccgcgtggctgtttttgaactgcctggaacctaa
25	SBF2-AS1	atgcacacacatgttcagtgctgtactattcacaatagcaaagacatgga gtcaacctatatgcccatcaacggtagactggataaagaaaatatggtac atatacaccatggaatactacacagccataaaaagaatgagcttatgtcc tttgcagtaacacagctgaagcaaactaacacaggaatggaaaaccaaat actgcatattctcacttataagtgggagctaaacattgagtacacatgga cacaaagaaaggaatag
26	PCAT6	atgaggcgctcctcgcgttccttccgggctccaggtgtccgtgagcctcc cttccgccctggcctccggtctctgccttgctcgtgcttctaccaccacc cttcccctcccaacccggtggatcctctcgtctcccccagtctccagtgc accggctttccctcgtcctctgcgcagtccatctcagctcatctctccaa ttcaatgccatcatctctcctcaccatctctcggtgccctggaatgtttg ctgtcagatgtcccctgtga
27	LINC00115	atgtggcttgtcttccatcgtccccaccctcgcccctcttggcccctcag ggcagccctgggattcggcagacgccagtcctccctgagatgcttccccg tccttccctccgccaggccctacgtctccgcaaaccccacgcttcggggt ggccgcctcagacaggaccctgagtccgagactggggtaggggacctgcc cgatcctgtaacaaccctcgtgcttctgcacaatcgcctcccactagcgg tgactgttgggtgtctaccttcccggtgtcccactgagaagcgggctcct ccttggcaggggcttcttcattgcctcgctgtggatgtcgaggtggggca ggagagtgaggagaaaacagagaggagggaggtagagccaac…
28	DRAIC	atgaagcccgtgaactcaactcctgagaaggacgcagcagagcgagagaa aagatggaataaaaaggcctacctcattgggctcgtgtgggtgaggagaa ctgaagagtctgagagcgcggcacgagccagaggctacggaaaacactgc cctcctacactccaccttggagagacccagaaaagaacaagcttcatttg taaaaaaggaaaacaactcaggcaatgggggtggcttaaaggcactctac agtgtgcagatgccttccacttcttccatctgccctgtctctccaagaac ccctatggccccggtctcagaacagagctgagtgcagaaatgaaaatcta tggctctgtgttccaaaacgatgaagaatttcaagatggtgg…
29	CASC2/tv1	atgacacaggagaagatgtaccctcatctgttcagtgagagatgtgcaaa tcaacatcaacacagaactgctgaagaaaaaaaatatgtctctgaaaagc aacttattcactggagatgtgaggagccatccgcacatcacaattctata gacatcaaacgcatgaagcatttcggatctgctttaagactgaggcagac tttccatctggacacagccgaccatccatgtgtcattacaatgaatccag cacttccctggaagctggaagggtcaaattcaacttcaactctgccactt cctgcttaa
30	MIR4435-2HG/tv4	atgttctttgcagagggacaggaaaaaaaaaggatttttttttcttatca agagatactgtttcctcaaggagaaagggcatcagtccaaggcactggtt tgctcaaaaagattagtaaagaacaagcatattttgtctgtggtgacaac atgatctccccccccccactagtaaactcacagcatcagtacgcaggcag tgtgatgcattttcaaagttcctcacttttccagatccaacaggactctt gtgcacatactcggtgtttccatggcaaatccactgtgtatgaaaattag
31	LINC00635/tv2	atgaagaaatggagattactgaaaataattcattttggtatcttcttaca tcctgagagactaatctttccaagttcatctgaggctcctcttctccatg acaacctcatccagggatttcttcctgtcctggtgttttatgacatgtgg aaggggactgtagcaggtgatctccaaagtctctggagacttactaatgt gcatcctcatctcgcttgtaaggataatagccttcctccaaacctcacac acttttggaggagatcactttttttaaagtgcatggaaatgttttga
32	MIR7-3HG	atgccgggaatgaggctggtttgcaggttggcgcatggacattttcccag aaagggacagagacggcgaagtttgacggtctggaaagcagagaccagca gggctgactgcttgggagcaccaaatatccggacagcgcctctcgggagg tccgagaagagaaccgcgatctgtttcagcaccggggctcaggacagttc ccagcgggctccgtttcgtctccagaaccctggacagctcctccagcttg gaatgcactccctccacctccaaccagagctccccacaactgaccctgcc ttcttctgcaagctccatttcatcaagggaaacgatccttattgcctcac catttcccacgtgaagtctgtattgacattctcatag
