# Supplementary material for: Oncopeptide MBOP Encoded by LINC01234 Promotes Colorectal Cancer through MAPK Signaling Pathway
Source: Cancers (Basel). 2022 May 9;14(9):2338. doi: 10.3390/cancers14092338 (PMC9100262; doi:10.3390/cancers14092338)
Supplement: Supplementary file 1 [file cancers-14-02338-s001.zip › Table S2 Verification of LINC01234ORF.xlsx]

## Sheet: Sheet1
Accession	Description	Score	Coverage	# Proteins	# Unique Peptides	# Peptides	# PSMs	# AAs	MW [kDa]	calc. pI
LINC01234ORF	sequence	500.459	91.4	1	5	5	350	93	10.9643	6.68311
	A2	Sequence	# PSMs	# Proteins	# Protein Groups	Protein Group Accessions	Modifications	ΔCn	XCorr	Charge	MH+ [Da]	RT [min]	# Missed Cleavages
	High	mASLLGHHLQSLLQAGSYIPQNNHPSDHASVWGNEDQPR	18	1	1	01234O	M1(Oxidation)	0	5.63792	4	4321.11	97.6253	0
	High	mASLLGHHLqSLLQAGSYIPQNNHPSDHASVWGnEDQPR	46	1	1	01234O	M1(Oxidation); Q10(Deamidated); N34(Deamidated)	0	5.51891	4	4323.06	101.507	0
	High	MASLLGHHLQSLLQAGSYIPQNNHPSDHASVWGNEDQPR	15	1	1	01234O		0	4.81732	4	4305.1	103.208	0
	High	MASLLGHHLqSLLQAGSYIPQNNHPSDHASVWGnEDQPR	45	1	1	01234O	Q10(Deamidated); N34(Deamidated)	0	4.7475	5	4307.09	102.392	0
	High	mASLLGHHLqSLLQAGSYIPQNnHPSDHASVWGnEDQPR	4	1	1	01234O	M1(Oxidation); Q10(Deamidated); N23(Deamidated); N34(Deamidated)	0	4.72021	4	4324.09	99.6487	0
	High	mASLLGHHLQSLLQAGSYIPQNNHPSDHASVWGnEDQPR	99	1	1	01234O	M1(Oxidation); N34(Deamidated)	0	4.07254	4	4322.11	98.8934	0
	High	MASLLGHHLQSLLqAGSYIPqNNHPSDHASVWGNEDqPR	19	1	1	01234O	Q14(Deamidated); Q21(Deamidated); Q37(Deamidated)	0	3.90586	5	4308.08	109.675	0
	High	MASLLGHHLqSLLQAGSYIPQNNHPSDHASVWGNEDQPR	73	1	1	01234O	Q10(Deamidated)	0	3.63845	5	4306.09	105.242	0
	High	DVWIWmYGFHSFYPGK	3	1	1	01234O	M6(Oxidation)	0	3.62095	2	2048.96	131.967	0
	High	DVWIWMYGFHSFYPGK	2	1	1	01234O		0	3.55943	2	2032.95	136.321	0
	High	SLLILQcPSK	5	1	1	01234O	C7(Carbamidomethyl)	0	3.49695	2	1158.67	55.9388	0
	High	nLRDYKDDDDK	2	1	1	01234O	N1(Deamidated)	0	2.22628	2	1397.62	16.4186	2
	Medium	SLLILqcPSK	1	1	1	01234O	Q6(Deamidated); C7(Carbamidomethyl)	0	1.42271	2	1159.65	59.4084	0
	Medium	KEEKEGEWK	17	1	1	01234O		0	1.35827	2	1162.56	22.6411	2
	Medium	NLRDYKDDDDK	1	1	1	01234O		0	0.947525	2	1396.64	33.0233	2
