# Supplementary material for: Oncopeptide MBOP Encoded by LINC01234 Promotes Colorectal Cancer through MAPK Signaling Pathway
Source: Cancers (Basel). 2022 May 9;14(9):2338. doi: 10.3390/cancers14092338 (PMC9100262; doi:10.3390/cancers14092338)
Supplement: Supplementary file 1 [file cancers-14-02338-s001.zip › Table S3 Mass spectrometry of CRC tissue 21.xlsx]

## Sheet: 21C
Accession	Description	Score	Coverage	# Proteins	# Unique Peptides	# Peptides	# PSMs	# AAs	MW [kDa]	calc. pI
21C	protein	0	82.35	1	3	3	7	85	9.96993	8.20654
	A2	Sequence	# PSMs	# Proteins	# Protein Groups	Protein Group Accessions	Modifications	ΔCn	XCorr	Charge	MH+ [Da]	ΔM [ppm]	RT [min]	# Missed Cleavages
	High	EGEWKDVWIWmYGFHSFYPGK	1	1	1	21C	M11(Oxidation)	0	0.969861	3	2678.21	-3.90297	67.8927	1
	High	SLLILQcPSKmASLLGHHLqSLLQAGSYIPQNNHPSDHASVWGNEDQPR	4	1	1	21C	C7(Carbamidomethyl); M11(Oxidation); Q20(Deamidated)	0	0.969334	6	5461.65	-6.10322	113.791	1
	High	SLLILQcPSKmASLLGHHLQSLLQAGSYIPqNNHPSDHASVWGNEDqPR	1	1	1	21C	C7(Carbamidomethyl); M11(Oxidation); Q31(Deamidated); Q47(Deamidated)	0	0.964642	6	5462.64	-4.49449	109.116	1
	High	SLLILqcPSK	1	1	1	21C	Q6(Deamidated); C7(Carbamidomethyl)	0	0.656821	2	1159.65	8.55789	21.4952	0

## Sheet: 21N
Accession	Description	Score	Coverage	# Proteins	# Unique Peptides	# Peptides	# PSMs	# AAs	MW [kDa]	calc. pI
21N	protein	0	61.18	1	2	2	9	85	9.96993	8.20654
	A2	Sequence	# PSMs	# Proteins	# Protein Groups	Protein Group Accessions	Modifications	ΔCn	XCorr	Charge	MH+ [Da]	ΔM [ppm]	RT [min]	# Missed Cleavages
	High	SLLILQcPSKMASLLGHHLqSLLQAGSYIPQNNHPSDHASVWGNEDQPRNLR	6	1	1	21N	C7(Carbamidomethyl); Q20(Deamidated)	0	1.25017	5	5828.86	-9.08637	137.757	2
	High	SLLILQcPSKMASLLGHHLQSLLQAGSYIPQNNHPSDHASVWGNEDQPRNLR	2	1	1	21N	C7(Carbamidomethyl)	0	1.19091	3	5827.9	-5.01852	135.58	2
	High	SLLILqcPSK	1	1	1	21N	Q6(Deamidated); C7(Carbamidomethyl)	0	0.859987	2	1159.65	6.87366	20.2006	0
