# Supplementary material for: Oncopeptide MBOP Encoded by LINC01234 Promotes Colorectal Cancer through MAPK Signaling Pathway
Source: Cancers (Basel). 2022 May 9;14(9):2338. doi: 10.3390/cancers14092338 (PMC9100262; doi:10.3390/cancers14092338)
Supplement: Supplementary file 1 [file cancers-14-02338-s001.zip › Table S4 266 Candidate interacting proteins.xlsx]

## Sheet: Sheet1
ProteinID	ProteinName	UniquePepCount	CoverPercent	MW
P35579	Myosin-9	22	0.1102	226530
E5RHW4	Erlin-2	7	0.1834	37725
Q15365	Poly(rC)-binding protein 1	7	0.177	37497.4
Q1RMG2	Adenosylhomocysteinase	7	0.219	33810.7
Q9BQE3	Tubulin alpha-1C chain	6	0.1091	49894.8
A0A087WZN1	Isocitrate dehydrogenase [NAD] subunit, mitochondrial	6	0.1214	42410.5
Q4G0W6	TMOD2 protein	6	0.1336	34522.9
P08865	40S ribosomal protein SA	6	0.1559	32853.7
Q4LE79	DSP variant protein	5	0.0177	265192
Q5T4U5	Medium-chain specific acyl-CoA dehydrogenase, mitochondrial	5	0.0969	50270.1
A0A087X2I1	26S proteasome regulatory subunit 10B	5	0.0819	45796.5
Q15366	Poly(rC)-binding protein 2	5	0.1315	38579.7
D6RH20	28S ribosomal protein S27, mitochondrial	5	0.1438	34458
D3DNB2	Sec61 alpha 1 subunit (S. cerevisiae), isoform CRA_c	4	0.0714	52264.1
A0A087WVQ9	Elongation factor 1-alpha 1	4	0.0736	50140.3
A0A024R482	Epididymis secretory sperm binding protein	4	0.1	46290.6
O15372	Eukaryotic translation initiation factor 3 subunit H	4	0.1023	39929.9
A0A384NL63	Epididymis secretory sperm binding protein	4	0.0873	39594.5
Q13247	Serine/arginine-rich splicing factor 6	4	0.1134	39586.3
A0A024RDF4	Heterogeneous nuclear ribonucleoprotein D (AU-rich element RNA binding protein 1, 37kDa), isoform CRA_e	4	0.0948	32834.2
H0YJG7	Activator of 90 kDa heat shock protein ATPase homolog 1	4	0.1574	23696.7
A0A343J4V6	MHC class I antigen	4	0.1492	20967
A0A2U7N6N9	MHC class I antigen	4	0.1492	20967
A0A0E3DCV9	MHC class I antigen	4	0.1934	20905.6
A0A0A0MTS7	Titin	3	0.0005	3.99461e+06
A0A024R6B5	Heat shock 70kDa protein 2, isoform CRA_a	3	0.0391	70020.1
Q6IAX5	Eukaryotic translation initiation factor 3 subunit E	3	0.0652	52205.2
O14929	Histone acetyltransferase type B catalytic subunit	3	0.043	49512
O15427	Monocarboxylate transporter 4	3	0.0731	49468.8
Q53EU6	Glycerol-3-phosphate acyltransferase 3	3	0.0599	48704.6
Q15070	Mitochondrial inner membrane protein OXA1L	3	0.0506	48547.3
Q92947	Glutaryl-CoA dehydrogenase, mitochondrial	3	0.0411	48126.6
B4DVN3	E3 ubiquitin-protein transferase MAEA	3	0.0608	45073.4
Q49AJ9	RPL3 protein	3	0.1076	28581.2
Q7RTM4	Spectrin-like protein of the nuclear envelope and Golgi	2	0.0014	966330
A6NKT7	RanBP2-like and GRIP domain-containing protein 3	2	0.0068	197485
V5YQL4	Adenosylhomocysteinase	2	0.0145	130895
Q96N66	Lysophospholipid acyltransferase 7	2	0.0254	52764.3
P17706	Tyrosine-protein phosphatase non-receptor type 2	2	0.0289	48472.7
O75616	GTPase Era, mitochondrial	2	0.0435	48349.5
D3DU01	Transmembrane protein 49, isoform CRA_b	2	0.031	47553.6
A0A494C1L1	3-beta-hydroxysterol Delta (14)-reductase	2	0.0365	46925.5
Q9ULX3	RNA-binding protein NOB1	2	0.0364	46674.4
P82933	28S ribosomal protein S9, mitochondrial	2	0.0379	45834.3
P00738	Haptoglobin	2	0.0419	45204.8
P31689	DnaJ homolog subfamily A member 1	2	0.0302	44867.7
Q9H871	E3 ubiquitin-protein transferase RMND5A	2	0.0384	43992.1
P08559	Pyruvate dehydrogenase E1 component subunit alpha, somatic form, mitochondrial	2	0.0462	43295.2
P12277	Creatine kinase B-type	2	0.0367	42643.8
Q8TBM8	DnaJ homolog subfamily B member 14	2	0.0501	42515.2
Q9BX40	Protein LSM14 homolog B	2	0.0286	42070.2
A0A024RCX4	Mitochondrial carrier homolog 1 (C. elegans), isoform CRA_c	2	0.054	41543.8
B4DFY5	Mitogen-activated protein kinase kinase 1, isoform CRA_d	2	0.0323	41378.3
P63096	Guanine nucleotide-binding protein G(i) subunit alpha-1	2	0.0537	40360.6
Q96BN8	Ubiquitin thioesterase otulin	2	0.0511	40262.5
Q9BQ04	RNA-binding protein 4B	2	0.0501	40149.2
B5BUD2	Replication factor C 2 isoform 1	2	0.0395	39184.9
Q5U676	Galactosylgalactosylxylosylprotein 3-beta-glucuronosyltransferase	2	0.0557	37827.8
P22626	Heterogeneous nuclear ribonucleoproteins A2/B1	2	0.0482	37429.2
B5MCX3	Septin-2	2	0.0436	36939.8
A0A024R401	cAMP responsive element binding protein 1	2	0.0469	36687.7
A0A024RDZ9	PCI domain-containing protein	2	0.0445	33782.7
V9GYN7	DnaJ homolog subfamily B member 12	2	0.058	31119.5
P62424	60S ribosomal protein L7a	2	0.0489	29995.2
P16402	Histone H1.3	2	0.0905	22349.6
K7EJ57	Mitochondrial import receptor subunit TOM40 homolog	2	0.0935	21914.4
A0A0A0MSS4	Nuclear migration protein nudC	2	0.1353	15295.5
A0A494BZW6	Ciliogenesis and planar polarity effector 1	1	0.0026	259081
P12883	Myosin-7	1	0.0026	223095
Q6ZMW3	Echinoderm microtubule-associated protein-like 6	1	0.0041	217897
A0A3B3IUD7	Programmed cell death 11, isoform CRA_a	1	0.0037	208826
A0A2R8Y5P9	Protein Shroom3	1	0.0047	208047
A0A2R8YFZ7	Cytoplasmic dynein 1 heavy chain 1	1	0.0036	193496
A6NES4	Maestro heat-like repeat-containing protein family member 2A	1	0.0036	189559
O00750	Phosphatidylinositol 4-phosphate 3-kinase C2 domain-containing subunit beta	1	0.0061	184766
G3V1X8	A disintegrin and metalloproteinase with thrombospondin motifs 20	1	0.0053	169466
A0A1B0GVL4	Protein FAM193A	1	0.004	166370
P30622	CAP-Gly domain-containing linker protein 1	1	0.0056	162244
Q9UQ26	Regulating synaptic membrane exocytosis protein 2	1	0.0035	160401
Q8TEF1	FLJ00246 protein	1	0.004	157809
P02452	Collagen alpha-1(I) chain	1	0.0061	138940
H0Y843	EF-hand calcium-binding domain-containing protein 5	1	0.0051	136764
E9PE96	Protein piccolo	1	0.0082	136392
A0A384MDU2	Collagen, type I, alpha 2, isoform CRA_c	1	0.0081	129286
Q4KMR3	MYO1E variant protein	1	0.0045	127060
A0A3B3ISF6	Kelch domain-containing protein 7B	1	0.0057	126660
Q9NPG3	Ubinuclein-1	1	0.0044	121519
E9PGM9	RNA-binding protein 6	1	0.0091	113928
P86452	Zinc finger BED domain-containing protein 6	1	0.0072	109972
A0A0A0MRS8	Kinesin-like protein	1	0.0075	104024
P84550	SKI family transcriptional corepressor 1	1	0.0062	99829.4
A0A220T1R9	ANKLE2	1	0.0057	97532.4
Q2Q1W2	E3 ubiquitin-protein ligase TRIM71	1	0.0081	93383.8
Q6GQQ9	OTU domain-containing protein 7B	1	0.0083	92524.8
A0A0C4DGW7	Protein FAM47A	1	0.0064	89094.8
Q6P2Q0	ABCB9 protein	1	0.0091	84786.1
F8W7S5	Ribosome-binding protein 1	1	0.008	84325.2
Q6N043	Zinc finger protein 280D	1	0.008	84099
Q5BKZ8	HSPA12B protein	1	0.0146	75904.8
A0A024RBZ9	Serine/threonine-protein phosphatase with EF-hands	1	0.0092	75791.2
D3DQ79	Nexilin (F actin binding protein), isoform CRA_b	1	0.0131	72896.5
M0R3F1	Heterogeneous nuclear ribonucleoprotein U-like protein 1	1	0.0094	71610.5
A0A3B3ITU2	Zinc finger protein 676	1	0.0097	71383.7
A0A0S2Z4W6	Glutamine--fructose-6-phosphate transaminase (isomerizing)	1	0.0143	70931.8
V9HW42	Epididymis secretory protein Li 105	1	0.0119	69397.9
Q2TBA0	Kelch-like protein 40	1	0.0097	69256.6
Q9Y2M5	Kelch-like protein 20	1	0.0115	67953.9
B4DN07	Rho GTPase-activating protein 6	1	0.0099	67655.8
Q8WVR3	Microtubule-associated protein 11	1	0.0121	62596.2
Q6B4S3	Voltage-gated sodium channel Nav1.6	1	0.0129	60851.4
Q8NAF0	Zinc finger protein 579	1	0.016	60508.6
A0A1B0GUN0	Pleckstrin homology domain-containing family A member 7	1	0.0095	60194.8
A0A024R095	Chloride channel CLIC-like protein 1	1	0.01	56266.4
A0A384N6C2	Inosine-5'-monophosphate dehydrogenase	1	0.0233	55804.3
Q00536	Cyclin-dependent kinase 16	1	0.0121	55715
A1P3F0	STEAP family member 3, isoform CRA_b	1	0.0123	54600
Q96KP4	Cytosolic non-specific dipeptidase	1	0.0105	52877.8
A0A0K0Q2Z1	Antithrombin-III	1	0.0151	52541.7
P48735	Isocitrate dehydrogenase [NADP], mitochondrial	1	0.0199	50908.7
A0A024RBH7	Thymopoietin, isoform CRA_a	1	0.0176	50669.6
P01871	Immunoglobulin heavy constant mu	1	0.0132	49439.2
Q9BX95	Sphingosine-1-phosphate phosphatase 1	1	0.0136	49107.2
D3DXC9	Serine hydroxymethyltransferase	1	0.018	49061.5
Q96C92	Endosome-associated-trafficking regulator 1	1	0.0138	47960.7
H0YIC4	Citrate synthase	1	0.0165	47872.6
P22830	Ferrochelatase, mitochondrial	1	0.0142	47861.7
O00231	26S proteasome non-ATPase regulatory subunit 11	1	0.0213	47463.2
Q7L0Y3	tRNA methyltransferase 10 homolog C	1	0.0248	47346.4
P49674	Casein kinase I isoform epsilon	1	0.0313	47314.6
A0A0A0MQU0	WD repeat-containing protein 18	1	0.021	46909.1
O75874	Isocitrate dehydrogenase [NADP] cytoplasmic	1	0.0314	46658.8
P26440	Isovaleryl-CoA dehydrogenase, mitochondrial	1	0.0235	46650.3
Q70YC5	Protein ZNF365	1	0.0172	46541.5
A6NGH8	Ankyrin repeat domain-containing protein 61	1	0.0239	46140
W0HJ78	Apolipoprotein B mRNA editing enzyme catalytic polypeptide-like 3B	1	0.0183	45951.8
Q75L23	26S proteasome AAA-ATPase subunit RPT1	1	0.0147	45831.2
Q13572	Inositol-tetrakisphosphate 1-kinase	1	0.0217	45620.5
P51398	28S ribosomal protein S29, mitochondrial	1	0.0276	45565.9
A0A0S2Z5C3	PAK1 interacting protein 1 isoform 1	1	0.0204	43963.3
A0A024R9I0	V-type proton ATPase subunit C	1	0.0183	43941.1
A0A024RC55	Lactadherin	1	0.0233	43122.5
Q92604	Acyl-CoA:lysophosphatidylglycerol acyltransferase 1	1	0.0216	43088.9
P31483	Nucleolysin TIA-1 isoform p40	1	0.0233	42962.7
Q9UH62	Armadillo repeat-containing X-linked protein 3	1	0.0211	42500.1
Q53RZ9	GPN-loop GTPase	1	0.0294	41739.6
A0A0A0MS54	cAMP-dependent protein kinase catalytic subunit beta	1	0.0252	41307.9
A0A5F9UP49	45 kDa calcium-binding protein	1	0.0254	40936.2
P40938	Replication factor C subunit 3	1	0.0197	40555.9
Q4VAK3	OFD1 protein	1	0.0177	40361.9
A0A024R355	Three prime histone mRNA exonuclease 1, isoform CRA_b	1	0.0258	40063.5
E5KTM5	rRNA adenine N(6)-methyltransferase	1	0.026	39542.5
Q9NZL4	Hsp70-binding protein 1	1	0.0279	39302.4
A0JLQ5	Brix domain-containing protein 2	1	0.0209	39169.4
P61962	DDB1- and CUL4-associated factor 7	1	0.0205	38925.8
Q15293	Reticulocalbin-1	1	0.0211	38889.5
H3BM60	Codanin-1	1	0.0259	37928.3
F8VWH9	ADP-ribosylation factor GTPase-activating protein 1	1	0.0265	37108.6
Q8WVY7	Ubiquitin-like domain-containing CTD phosphatase 1	1	0.0189	36804.2
Q96IZ0	PRKC apoptosis WT1 regulator protein	1	0.0382	36567.1
F8VVM2	Phosphate carrier protein, mitochondrial	1	0.0216	36160.8
D6RF48	Syntaxin-18	1	0.026	35420.3
Q9Y4A9	Olfactory receptor 10H1	1	0.0157	35254.1
Q6IB29	EBNA1 binding protein 2	1	0.0261	34851.6
S4R350	Alpha-1,3-glucosyltransferase	1	0.0266	34611.7
A0A0C4DGZ6	Ribonucleoside-diphosphate reductase subunit M2 B	1	0.0303	34488.2
A0A024R2V4	Coiled-coil domain containing 51, isoform CRA_a	1	0.0265	33656.9
A0A024R8X4	Fe2OG dioxygenase domain-containing protein	1	0.0305	33067.7
A0A2R8YEY5	DNA-directed RNA polymerases I and III subunit RPAC1	1	0.0344	32917.4
A0A0S2Z491	Nucleophosmin	1	0.0306	32574.7
A8MXD5	Glutaredoxin domain-containing cysteine-rich protein 1	1	0.0207	32293.3
O60812	Heterogeneous nuclear ribonucleoprotein C-like 1	1	0.0307	32142
Q99943	1-acyl-sn-glycerol-3-phosphate acyltransferase alpha	1	0.0353	31716.2
Q5T8R3	Monocarboxylate transporter 1	1	0.0405	31689
H0YF92	Putative sodium-coupled neutral amino acid transporter 10	1	0.0235	31647.5
K7EKP8	Cytosolic acyl coenzyme A thioester hydrolase	1	0.0287	30791.8
E9PPM8	2-deoxy-D-ribose 5-phosphate aldolase	1	0.0218	30516.8
Q5SZE4	Ceramide synthase 2	1	0.0361	29842.3
Q9BSF4	Mitochondrial import inner membrane translocase subunit Tim29	1	0.0231	29233
D6RID8	General transcription factor IIH subunit 2-like protein	1	0.0356	28483.5
D9YZV7	Tropomyosin 1 (Alpha) isoform 6	1	0.0245	28385.2
E1B6W4	Arginine/serine-rich coiled-coil protein 2	1	0.0254	28216.5
Q9Y6H3	Mitochondrial inner membrane protease ATP23 homolog	1	0.0285	28080.2
M0R0I0	BRISC and BRCA1-A complex member 1	1	0.0489	24626.2
A0A0D9SF20	Polypyrimidine tract binding protein 1, isoform CRA_e	1	0.0508	21912.9
K7ENJ4	ATP synthase subunit alpha, mitochondrial	1	0.0503	21338.6
K7EKB6	Thimet oligopeptidase	1	0.0511	20589
A0A087WW88	Charged multivesicular body protein 2b	1	0.0335	20431.2
H3BMS6	Sulfide:quinone oxidoreductase, mitochondrial	1	0.0442	19942.6
A0A0C4DGN4	Zymogen granule protein 16 homolog B	1	0.0506	19600.2
F6X3N5	Guanine nucleotide-binding protein G(I)/G(S)/G(T) subunit beta-1	1	0.0491	18339.6
Q9UJZ2	Cytovillin 2	1	0.0329	18196
P0DP25	Calmodulin-3	1	0.047	16837.4
H0YBU8	39S ribosomal protein L43, mitochondrial	1	0.0541	16566.6
C9J8F3	Fructose-bisphosphate aldolase	1	0.0537	16340.4
A0A5F9ZGW5	Aprataxin	1	0.0652	15410.3
C9J2P2	DnaJ homolog subfamily B member 6	1	0.0543	14874.3
F5H176	Nucleosome-remodeling factor subunit BPTF	1	0.0511	14663.1
C9J2X8	Origin recognition complex subunit 4	1	0.0859	14506.6
C9JTJ8	Serpin B8	1	0.0645	13927.6
H7C0X1	Leucine-zipper-like transcriptional regulator 1	1	0.0413	13210.4
A2N0T1	VH6DJ protein	1	0.0588	12910
J3QKR0	COP9 signalosome complex subunit 3	1	0.0603	12782.5
K7ERU2	KN motif and ankyrin repeat domain-containing protein 2	1	0.0492	12773.4
H9ZYJ2	Thioredoxin	1	0.0857	11737.4
A0A1B0GW42	Heterogeneous nuclear ribonucleoprotein F	1	0.0612	11079.5
A6XGL2	Insulin	1	0.0714	10958.7
Q86WI7	Integrase interactor 1 protein isoform E	1	0.0787	10077.2
Q9UN38	Leucine zipper-like protein	1	0.0857	7864.09
L8E745	Alternative protein PCBP2	1	0.0952	7182.45
A9P3T2	Nonfunctional Rhesus blood group D antigen	1	0.0984	6644.72
H0YC85	Calcium-activated potassium channel subunit beta-4	1	0.2045	5309.84
H0YDG8	RNA-binding protein 4B	1	0.25	2426.62
F6KPG5	Albumin
Q8WVW5	Uncharacterized protein
F4ZW62	NF45
Q9Y6E3	26S proteasome non-ATPase regulatory subunit 13
A8K674	cDNA FLJ75516, highly similar to Xenopus tropicalis ubiquitin C, mRNA
A0A140VJF3	Testicular tissue protein Li 27
A0A384NQ21	Epididymis secretory sperm binding protein
B4DI06	2',3'-cyclic-nucleotide 3'-phosphodiesterase
A8KAQ6	cDNA FLJ76490, highly similar to Homo sapiens ancient ubiquitous protein 1 (AUP1), transcript variant 2, mRNA
B4E052	cDNA FLJ52378, highly similar to Tubulin beta-7 chain
B4E352	cDNA FLJ54953, highly similar to Heterogeneous nuclear ribonucleoprotein G
D5H3U0	MHC class I antigen
O62918	MHC class I antigen
G5E9C7	Dual-specificity mitogen-activated protein kinase kinase 2
S4TZE2	MHC class I antigen
A0A1C8DSL8	MHC class I antigen
A0A384MEF1	Actin-depolymerizing factor
F6IQ78	HLA class I antigen
Q6ZP37	cDNA FLJ26554 fis, clone LNF01773, highly similar to Galactokinase
A0A5C2GDN1	IGH + IGL c107_heavy_IGHV3-74_IGHD7-27_IGHJ4
A8K556	cDNA FLJ78217
A8K9B2	cDNA FLJ76725, highly similar to Homo sapiens L-2-hydroxyglutarate dehydrogenase (L2HGDH), mRNA
F8LSV7	MHC class I
Q6DU50	HLA-E
A8K8Q4	DNA ligase
Q9P2E8	E3 ubiquitin-protein ligase MARCHF4
A0A5C2GVY7	IG c1013_light_IGKV3-11_IGKJ4
A8K4T7	cDNA FLJ77111, highly similar to Homo sapiens microtubule-associated protein 1A (MAP1A), mRNA
A8K9U2	cDNA FLJ77474, highly similar to Homo sapiens ankyrin repeat and SOCS box-containing 6 (ASB6), transcript variant 1, mRNA
A8K607	cDNA FLJ76855, highly similar to Homo sapiens exportin 7 (XPO7), mRNA
A8KA77	cDNA FLJ78669, highly similar to Homo sapiens tetratricopeptide repeat domain 21B (TTC21B), mRNA
B3KSU9	cDNA FLJ37014 fis, clone BRACE2010203, highly similar to Zinc phosphodiesterase ELAC protein 2
B4DG35	cDNA FLJ56905, highly similar to ADP-dependent glucokinase
B3KNB4	cDNA FLJ14168 fis, clone NT2RP2001440, highly similar to 14-3-3 protein gamma
B3KVD4	cDNA FLJ16429 fis, clone BRACE3008238, highly similar to Zinc finger and BTB domain-containing protein 4
B3KVB3	cDNA FLJ16332 fis, clone SYNOV2016837, highly similar to Sphingosine kinase 1
B4DIW8	cDNA FLJ61282, highly similar to Mitochondrial 28S ribosomal protein S5
B4DMJ6	60S ribosomal protein L4
B4DSS0	cDNA FLJ59300, highly similar to Homo sapiens peroxisome proliferative activated receptor, gamma, coactivator-related 1, mRNA
B4DKM6	cDNA FLJ54305, highly similar to Serum paraoxonase/arylesterase 2
B4DS26	cDNA FLJ50636, highly similar to Transcription factor 8
B7Z4W6	cDNA FLJ55495, highly similar to Ethanolamine-phosphate cytidylyltransferase
B7Z5W1	Junctional adhesion molecule 1
B4DUQ1	Heterogeneous nuclear ribonucleoprotein K
E5KN55	Peptidyl-prolyl cis-trans isomerase D
O00184	Hunc18b2
Q14329	Farnesyl pyrophosphate synthetase like-4 protein
Q3B7W4	C10orf118 protein
O14660	GARS-AIRS-GART
Q6ZRK5	cDNA FLJ46283 fis, clone TESTI4031173
Q6ZS99	Nucleolin
Q7KZ24	Nuclease sensitive element binding protein-1
Q7KZ41	Reverse transcriptase domain-containing protein
Q9NV86	cDNA FLJ10873 fis, clone NT2RP4001730, weakly similar to UDP-GLUCOSE:GLYCOPROTEIN GLUCOSYLTRANSFERASE
