# Supplementary material for: Oncopeptide MBOP Encoded by LINC01234 Promotes Colorectal Cancer through MAPK Signaling Pathway
Source: Cancers (Basel). 2022 May 9;14(9):2338. doi: 10.3390/cancers14092338 (PMC9100262; doi:10.3390/cancers14092338)
Supplement: Supplementary file 1 [file cancers-14-02338-s001.zip › Table S5 Paired cancer tissue sapmles from patients.xlsx]

## Sheet: colorectal cancer
Number	Sex	Age	Subtype (Cancer type)	TNM stage	Location
1	Male	63	protruded	T4N0M0	Rectum
2	Female	63	protruded	T4N3M0	Rectum
3	Female	76	ulcerative	T4N2M0	Rectum
4	Male	53	ulcerative	T4N0M0	Rectum
5	Male	60	protruded	T4N0M0	Rectum
6	Female	54	protruded	T2N0M0	Rectum
7	Male	62	protruded	T4N0M0	Rectum
8	Female	58	protruded	T4N2M0	Rectum
9	Female	62	protruded	T4N2M0	Rectum
10	Female	65	protruded	T4N0M1	Rectum
11	Female	67	protruded	T4N1M0	Rectum
12	Female	55	ulcerative	T4N1M0	Rectum
13	Female	65	protruded	T2N1MO	Rectum
14	Female	72	infiltrative	T4N0M0	Transverse colon
15	Male	38	protruded	T4N3M1	Rectum
16	Male	46	protruded	T4N1M1	Transverse colon
17	Male	63	ulcerative	T4N0M0	Rectum
18	Male	71	ulcerative	T3N0M0	Rectum
19	Male	56	ulcerative	T2N0M0	Rectum
20	Male	55	protruded	T4N1M0	Ascending colon
21	Female	37	protruded	T4N3M0	Ascending colon
22	Male	62	ulcerative	T4N1M0	Transverse colon
23	Male	65	infiltrative	T4N0M0	Ascending colon
24	Female	37	protruded	T2N0M0	Rectum
25	Male	61	protruded	T4N1M0	Rectum
26	Female	79	protruded	T3N0M0	Rectum
27	Female	43	infiltrative	T4N2M0	Rectum
28	Male	61	ulcerative	T4N1M0	Rectum
29	Male	55	protruded	T2N0M0	Rectum
30	Male	46	protruded	T4N1M0	Rectum

## Sheet: lung cancer
Number	Number	Sex	Age	Subtype (Cancer type)	TNM stage	Location
1	1	Male	53	Peripheral adenocarcinoma	T1N0M1	Left upper lobe lung
2	2	Male	53	Peripheral squamous cell carcinoma	T2N1M0	Lower left lobe lung
3	3	Male	72	Peripheral adenocarcinoma	T1N0M0	Lower left lobe lung
4	4	Male	75	Central squamous cell carcinoma	T2N0M0	Lower left lobe lung
5	5	Male	67	Central squamous cell carcinoma	T2N1M0	Right middle lobe lung
6	6	Female	69	Peripheral adenocarcinoma	T3N1M1	Right upper lobe lung
7	7	Male	65	Central squamous cell carcinoma	T3N1M0	Right lower lobe lung
8	8	Female	72	Peripheral adenocarcinoma	T1N0M0	Right upper lobe lung
9	9	Female	58	Peripheral adenocarcinoma	T2N0M0	Left lower lobe lung
10	10	Male	73	Central squamous cell carcinoma	T3N0M0	Left lower lobe lung
11	11	Male	54	Central squamous cell carcinoma	T2N1M0	Left upper lobe lung
12	12	Female	53	Central adenocarcinoma	T2N0M0	Left lower lobe lung
13	13	Male	48	Central adenosquamous carcinoma	T2N0M0	Right upper lobe lung
14	14	Male	62	Central squamous cell carcinoma	T1N0M0	Right upper lobe lung
15	15	Male	67	Peripheral adenocarcinoma	T1N0M0	Left upper lobe lung
16	16	Male	64	Peripheral adenocarcinoma	T2N0M0	Right upper lobe lung
17	17	Male	66	Peripheral adenocarcinoma	T1N0M0	Left lower lobe lung
18	18	Male	62	Peripheral adenocarcinoma	T2N0M0	Right lower lobe lung
19	19	Female	63	Peripheral adenocarcinoma	T1N0M0	Right upper lobe lung
20	20	Female	69	Peripheral adenocarcinoma	T1N0M0	Left lower lobe lung

## Sheet: kidney cancer
Number	Sex	Age	Subtype (Cancer type)	TNM stage
1	Female	70	Chromophobe cell renal cell carcinoma	T1bN0M0
2	Male	28	Papillary renal cell carcinoma	T1aN0M0
3	Male	53	Chromophobe cell renal cell carcinoma	T1bN0M0
4	Female	52	Clear cell renal cell carcinoma	T1aN0M0
5	Male	57	Clear cell renal cell carcinoma	T1aN0M0
6	Male	54	Clear cell renal cell carcinoma	T1aN0M0
7	Male	57	Clear cell renal cell carcinoma	T1aN0M0
8	Female	44	Clear cell renal cell carcinoma	T1aN0M0
9	Male	50	Clear cell renal cell carcinoma	T1aN0M0
10	Male	55	Clear cell renal cell carcinoma	T3N0M0
11	Female	50	Clear cell renal cell carcinoma	T1aN0M0
12	Male	56	Clear cell renal cell carcinoma	T1bN0M0
13	Male	36	Clear cell renal cell carcinoma	T2bN0M0
14	Male	52	Clear cell renal cell carcinoma	T1aN0M0
15	Male	50	Advanced renal cell carcinoma	T1bN0M0
16	Male	52	Clear cell renal cell carcinoma	T1bN0M0

## Sheet: liver cancer
Number	Sex	Age	Subtype (Cancer type)	TNM stage
1	Female	67	Intrahepatic cholangiocarcinoma	T1N0M0
2	Male	67	Thick beam+Solid	T2N0M0
3	Female	69	Thin beam +Pseudo-glandular casts	T1N0M0
4	Male	69	Thick beam+Solid	T1N0M0
5	Male	46	Thick beam	T1N0M0
6	Male	67	Solid	T1N0M0
7	Male	61	Thin beam +Solid	T1N0M0
8	Male	70	Thin beam +Pseudo-glandular casts	T1N0M0
9	Male	67	Solid	T1N0M0
10	Male	73	Thick and Thin beam +Pseudo-glandular casts	T1N0M0
11	Male	54	Thick beam+Solid	T1N0M0
12	Male	38	Thick and Thin beam +Solid	T1N0M0
13	Male	68	Nodular	T1N0M0
14	Male	48	Nodular	T1N0M0
15	Male	74	Nodular+Pseudo-glandular casts	T1N0M0
16	Male	75	Nodular	T1N0M0

## Sheet: gastric cancer
Number	Sex	Age	Subtype (Cancer type)	TNM stage	Location
1	Male	72	Gastric cancer	T3N2M0	lesser curvature of stomach
2	Male	81	Gastric cancer	T3N3M0	cardia (of stomach)
3	Female	83	Gastric cancer	T4N2M1	cardia (of stomach)
4	Female	70	Gastric cancer	T3N2M0	gastric antrum
5	Male	74	Gastric cancer	T2N3M0	cardia (of stomach)
6	Male	80	Gastric cancer	T3N1M0	gastric antrum
7	Male	84	Gastric cancer	T3N1M0	gastric antrum
8	Male	64	Gastric cancer	T3N3M0	gastric antrum
9	Male	73	Gastric cancer	T3N3M0	lesser curvature of stomach
10	Male	54	Gastric cancer	T4N3M1	gastric antrum, lesser curvature of stomach
11	Male	69	Gastric cancer	T4N3M0	cardia (of stomach)
12	Male	70	Gastric cancer	T4N2M1	cardia (of stomach),lesser curvature of stomach
13	Female	82	Gastric cancer	T4N3M1	cardia (of stomach)
14	Male	71	Gastric cancer	T3N0M0	lesser curvature of stomach
15	Female	65	Gastric cancer	T4N3M1	cardia (of stomach)
16	Male	78	Gastric cancer	T4N3M1	cardia (of stomach)
17	Male	86	Gastric cancer	T4N3M1	gastric antrum, lesser curvature of stomach
18	Male	69	Gastric cancer	T4N2M1	cardia (of stomach)
19	Male	60	Gastric cancer	T1N0M0	gastric antrum
20	Male	54	Gastric cancer	T4N3M1	gastric antrum, lesser curvature of stomach
