# Supplementary material for: Oncopeptide MBOP Encoded by LINC01234 Promotes Colorectal Cancer through MAPK Signaling Pathway
Source: Cancers (Basel). 2022 May 9;14(9):2338. doi: 10.3390/cancers14092338 (PMC9100262; doi:10.3390/cancers14092338)
Supplement: Supplementary file 1 [file cancers-14-02338-s001.zip › Table S6 Primers and siRNA used in this research.xlsx]

## Sheet: Primers
Primers for RT-qPCR	Forward	Reverse
GAPDH	GCACCGTCAAGGCTGAGAAC	TGGTGAAGACGCCAGTGGA
LINC01234	CAGGGTACCCCAAGCAAGTC	GGGGTGAGAAGAGACAAGCG
LINC01234ORF	TACCCTGGCAAAAGCTTACTCA	CCCACACACTTGCATGGTC
MAP2K1	ACGCCCATCCAGCTGAACCC	TCCCGTTAACTGCAGAGCCGTC
MAEA	AACGAGAACAATCCGCCCAT	ACTTCTTTGGTTCTCGGGCACAC
RMND5A	TGGAACCACAAATCAGCGAGA	TATCAGCCCACTGGTTTGCAT
Gapdh	TGTGTCCGTCGTGGATCTGA	TTGCTGTTGAAGTCGCAGGAG
U6	CTCGCTTCGGCAGCACA	AACGCTTCACGAATTTGCGT

## Sheet: siRNA
siRNAs	Forward	Reverse
siLINC01234-1	CCUCGGUCUCAGUUUCUCCAUUUAU	AUAAAUGGAGAAACUGAGACCGAGG
siLINC01234-2	AGUUGAACCAAUCACUGUGCAUUUG	CAAAUGCACAGUGAUUGGUUCAACU
siLINC01234-3	GGAGAAUGGAAGGAUGUAUTT	AUACAUCCUUCCAUUCUCCTT
siRMND5A-1	GCACUUCUUUCGACAAGGATT	UCCUUGUCGAAAGAAGUGCTT
siRMND5A-2	GGGAUUGAGAACUCACCAUTT	AUGGUGAGUUCUCAAUCCCTT
siMAEA-1	CCAGCUGGGAAACAAUUCUTT	AGAAUUGUUUCCCAGCUGGTT
siMAEA-2	CCGCUCAGAAGAACAUUGATT	UCAAUGUUCUUCUGAGCGGTT
siMAP2K1-1	GGGAGAAGCACAAGAUCAUTT	AUGAUCUUGUGCUUCUCCCTT
siMAP2K1-2	GAGCAGAUUUGAAGCAACUTT	AGUUGCUUCAAAUCUGCUCTT
